# Supplementary material for: Expedient iron-catalyzed stereospecific synthesis of triazinesviacycloaddition of aziridines with diaziridines
Source: Royal Society of Chemistry journal article supplement (doi:10.1039/c9cc10089j), 2020-01-01

Supporting Information

**Expedient iron-catalyzed stereospecific synthesis of triazines *via* cycloaddition of aziridines with diaziridines**

**Table of Contents**

|    |                                                                                                                                           |         |
|----|-------------------------------------------------------------------------------------------------------------------------------------------|---------|
| 1  | General Information                                                                                                                       | S2      |
| 2  | Crystal Structure and Data of <b>3ai</b> and <b>3ik</b>                                                                                   | S3-S5   |
| 3  | Optimization of the Reaction Conditions                                                                                                   | S5-S6   |
| 4  | General Procedure for the Synthesis of [1,2,4]-Triazines                                                                                  | S6      |
| 5  | General Procedure for the Enantiospecific Synthesis of [1,2,4]-Triazines and HPLC Chromatograms of <b>3gp</b> , <b>3hp</b> and <b>3jp</b> | S6-S9   |
| 6  | Enantioselective Synthesis of [1,2,4]-Triazines using Chiral Ligands and HPLC Chromatograms                                               | S10-S12 |
| 7  | Characterization Data of <b>3aa-jp</b>                                                                                                    | S13-S30 |
| 8  | Intermolecular Competitive Experiments and Epimerization Reaction                                                                         | S30-S31 |
| 9  | Characterization Data of <b>4-7</b>                                                                                                       | S31-S34 |
| 10 | Large-scale synthesis of <b>3aa</b>                                                                                                       | S34     |
| 11 | References                                                                                                                                | S35     |
| 12 | NMR Spectra of <b>3aa-jp</b> and <b>4-7</b>                                                                                               | S36-S75 |

**General Information.** Alkenes, amines, (*S*)-(+)-2-phenylglycinol (99%), FeCl<sub>3</sub>•6H<sub>2</sub>O (>98%), FeCl<sub>2</sub>•4H<sub>2</sub>O (98%), Fe(acac)<sub>3</sub> (97%), Pd(dppf)Cl<sub>2</sub>•CH<sub>2</sub>Cl<sub>2</sub> (>99%), Pd(PPh<sub>3</sub>)<sub>4</sub> (99%) and 2,6-bis[(4*S*)-(-)-isopropyl-2-oxazolin-2-yl]pyridine (99%) were purchased from Aldrich and used as received. Fe(NO<sub>3</sub>)<sub>3</sub>•9H<sub>2</sub>O (98%) was purchased from Merck and FeCl<sub>3</sub> (96%) was purchased from Rankem. Diaziridines<sup>1</sup> and aziridines<sup>2,3</sup> were prepared according to reported procedure. (*R,R*)-(-)-*N,N'*-Bis(3,5-di-*tert*-butylsalicylidene)-1,2-cyclohexanediamine<sup>4</sup> and (1*R,2S*)-1-[(3,5-di-*tert*-butyl-2-hydroxybenzylidene)amino]-2-indanol<sup>5</sup> were prepared according to reported procedure. SRL silica gel G/GF 254 plates were used for analytical TLC and SRL silica gel (100-200 mesh) was used for column chromatography. NMR (<sup>1</sup>H, <sup>13</sup>C and <sup>19</sup>F) spectra were recorded with Bruker Ascend 400 MHz spectrometer using CDCl<sub>3</sub> as solvent and Me<sub>4</sub>Si as an internal standard. Chemical shifts ( $\delta$ ) and spin-spin coupling constant (*J*) are reported in ppm and in Hz, respectively, and other data are reported as follows: s = singlet, d = doublet, t = triplet, m = multiplet, q = quartet, dd = doublet of doublets. Melting points were determined using a Büchi B-540 apparatus and are uncorrected. FT-IR spectra were collected on Perkin Elmer IR spectrometer. Q-ToF ESI-MS instrument (model HAB 273) was used for recording mass spectra. Optical rotation was determined by using Rudolph autopol I automatic polarimeter. HPLC analysis was carried out using Waters-2489 with Daicel Chiralcel AD column using *iso*-propanol and hexane as eluent. Single crystal X-ray data of **3ai** was determined using Bruker SMART APEX-II CCD diffractometer, which is equipped with 1.75 kW sealed-tube Mo-K $\alpha$  irradiation and the crystal structure was solved by direct method using SHELXL-14 (Göttingen, Germany) and refined with full-matrix least squares on F<sup>2</sup> using SHELXL-14, while single crystal X-ray data of **3ik** was collected on a Bruker SMART APEX equipped with a CCD area detector using Mo/K $\alpha$  radiation and the structure was solved by direct method using SHELXL-16 (Göttingen, Germany).

## Crystal Structure and Data of 3ai

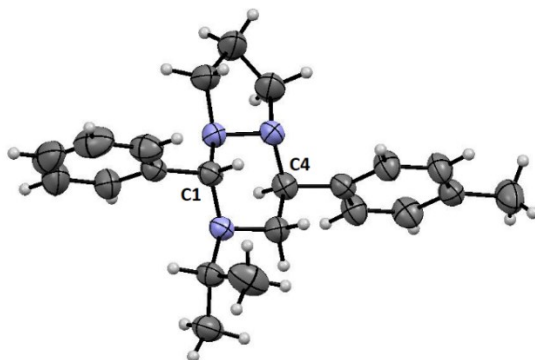

**Figure S1.** ORTEP diagram of 2-isopropyl-1-phenyl-4-(*p*-tolyl)hexahydro-6H-pyrazolo[1,2-*a*][1,2,4]triazine **3ai** (CCDC 1972128).

|                                                   |                                                                                                                                                    |
|---------------------------------------------------|----------------------------------------------------------------------------------------------------------------------------------------------------|
| Identification code                               | <b>3ai</b>                                                                                                                                         |
| Empirical formula                                 | 'C <sub>22</sub> H <sub>29</sub> N <sub>3</sub> '                                                                                                  |
| Formula weight                                    | 335.48                                                                                                                                             |
| Crystal habit, colour                             | block/Colorless                                                                                                                                    |
| Temperature, <i>T</i> /K                          | 293 K                                                                                                                                              |
| Wavelength, $\lambda/\text{\AA}$                  | 0.71073                                                                                                                                            |
| Crystal system                                    | 'monoclinic'                                                                                                                                       |
| Space group                                       | 'P 21/n'                                                                                                                                           |
| Unit cell dimensions                              | a = 16.2354(8) $\text{\AA}$<br>b = 5.8866(4) $\text{\AA}$<br>c = 20.5287(11) $\text{\AA}$<br>$\alpha = 90$<br>$\beta = 93.513(4)$<br>$\gamma = 90$ |
| Volume, $V/\text{\AA}^3$                          | 1958.3(2)                                                                                                                                          |
| <i>Z</i>                                          | 4                                                                                                                                                  |
| Calculated density, $\text{Mg}\cdot\text{m}^{-3}$ | 1.138                                                                                                                                              |
| Absorption coefficient, $\mu/\text{mm}^{-1}$      | 0.067                                                                                                                                              |
| $F(000)$                                          | 428                                                                                                                                                |
| $\theta$ range for data collection                | 2.51 to 25°                                                                                                                                        |
| Limiting indices                                  | -19 $\leq h \leq$ 19, -3 $\leq k \leq$ 7, -24 $\leq l \leq$ 21                                                                                     |
| Reflection collected / unique                     | 3450/2277                                                                                                                                          |
| Completeness to $\theta$                          | 99.9%                                                                                                                                              |
| Absorption correction                             | Multi-scan                                                                                                                                         |

|                                        |                                   |
|----------------------------------------|-----------------------------------|
| Max. and min. transmission             | 1.000 and 0.839                   |
| Refinement method                      | 'SHELXL-2014/7 (Sheldrick, 2014)' |
| Data / restraints / parameters         | 3450/0/ 229                       |
| Goodness-of-fit on $F^2$               | 1.024                             |
| Final $R$ indices [ $I > 2\sigma(I)$ ] | R1 = 0.0532, wR2 = 0.1448         |
| $R$ indices (all data)                 | R1 = 0.0846, wR2 = 0.1764         |

### Crystal Structure and Data of **3ik**

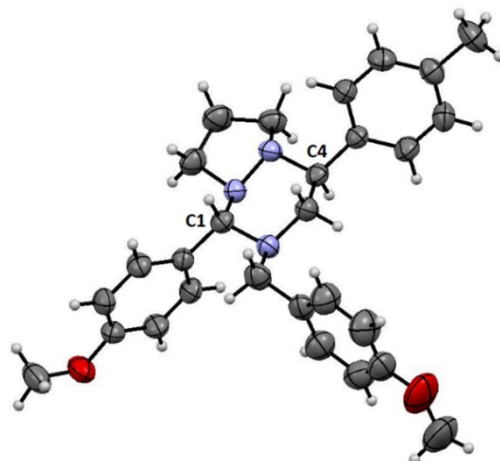

**Figure S2.** ORTEP diagram of 2-(4-methoxybenzyl)-1-(4-methoxyphenyl)-4-(*p*-tolyl)hexahydro-6H-pyrazolo[1,2-*a*][1,2,4]triazine **3ik** (CCDC 1972182).

|                                  |                                                                                                                                                                  |
|----------------------------------|------------------------------------------------------------------------------------------------------------------------------------------------------------------|
| Identification code              | <b>3ik</b>                                                                                                                                                       |
| Empirical formula                | 'C <sub>28</sub> H <sub>33</sub> N <sub>3</sub> O <sub>2</sub> '                                                                                                 |
| Formula weight                   | 443.57                                                                                                                                                           |
| Crystal habit, colour            | block/Colorless                                                                                                                                                  |
| Temperature, $T/K$               | 298 K                                                                                                                                                            |
| Wavelength, $\lambda/\text{\AA}$ | 0.71073                                                                                                                                                          |
| Crystal system                   | 'triclinic'                                                                                                                                                      |
| Space group                      | 'P -1'                                                                                                                                                           |
| Unit cell dimensions             | a = 6.1688(8) $\text{\AA}$<br>b = 10.0037(13) $\text{\AA}$<br>c = 20.560(3) $\text{\AA}$<br>$\alpha$ = 103.548(5)<br>$\beta$ = 91.180(5)<br>$\gamma$ = 95.599(5) |

|                                                   |                                                            |
|---------------------------------------------------|------------------------------------------------------------|
| Volume, $V/\text{\AA}^3$                          | 1226.4(3)                                                  |
| $Z$                                               | 2                                                          |
| Calculated density, $\text{Mg}\cdot\text{m}^{-3}$ | 1.201                                                      |
| Absorption coefficient, $\mu/\text{mm}^{-1}$      | 0.076                                                      |
| $F(000)$                                          | 476                                                        |
| $\theta$ range for data collection                | 2.23 to 25°                                                |
| Limiting indices                                  | $-7 \leq h \leq 7, -11 \leq k \leq 11, -23 \leq l \leq 23$ |
| Reflection collected / unique                     | 3951/2297                                                  |
| Completeness to $\theta$                          | 100%                                                       |
| Absorption correction                             | Multi-scan                                                 |
| Max. and min. transmission                        | 0.989 and 0.977                                            |
| Refinement method                                 | 'SHELXL-2016/6 (Sheldrick, 2016)'                          |
| Data / restraints / parameters                    | 3951/0/ 301                                                |
| Goodness-of-fit on $F^2$                          | 1.047                                                      |
| Final $R$ indices [ $I > 2\sigma(I)$ ]            | $R1 = 0.0668, wR2 = 0.1608$                                |
| $R$ indices (all data)                            | $R1 = 0.1299, wR2 = 0.2092$                                |

**Table S1.** Optimization of the reaction conditions<sup>a</sup>

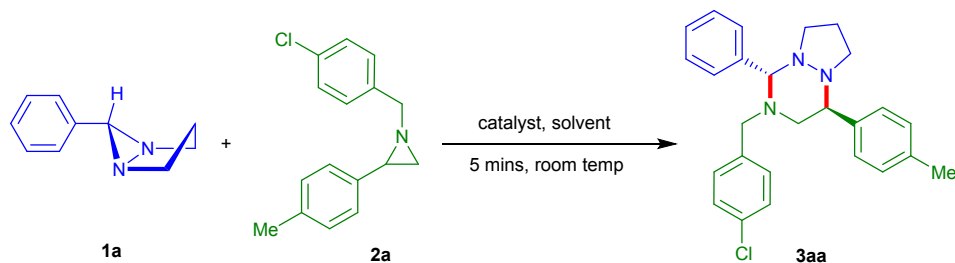

| Entry    | Catalyst (10 mol %)                                  | Solvent                             | Yield ( <b>3aa</b> , %) <sup>b</sup> |
|----------|------------------------------------------------------|-------------------------------------|--------------------------------------|
| <b>1</b> | <b>FeCl<sub>3</sub></b>                              | <b>CH<sub>2</sub>Cl<sub>2</sub></b> | <b>95</b>                            |
| 2        | FeCl <sub>3</sub> ·6H <sub>2</sub> O                 | CH <sub>2</sub> Cl <sub>2</sub>     | 79                                   |
| 3        | Fe(NO <sub>3</sub> ) <sub>3</sub> ·9H <sub>2</sub> O | CH <sub>2</sub> Cl <sub>2</sub>     | 32                                   |
| 4        | FeCl <sub>2</sub> ·4H <sub>2</sub> O                 | CH <sub>2</sub> Cl <sub>2</sub>     | n.r.                                 |
| 5        | Fe(acac) <sub>3</sub>                                | CH <sub>2</sub> Cl <sub>2</sub>     | n.r.                                 |
| 6        | FeCl <sub>3</sub>                                    | (CH <sub>2</sub> Cl) <sub>2</sub>   | 86                                   |
| 7        | FeCl <sub>3</sub>                                    | MeOH                                | 54                                   |
| 8        | FeCl <sub>3</sub>                                    | DMSO                                | n.r.                                 |
| 9        | FeCl <sub>3</sub>                                    | THF                                 | 72                                   |

|    |                   |                                 |      |
|----|-------------------|---------------------------------|------|
| 10 | FeCl <sub>3</sub> | Toluene                         | 81   |
| 11 | FeCl <sub>3</sub> | H <sub>2</sub> O                | n.r. |
| 12 | -                 | CH <sub>2</sub> Cl <sub>2</sub> | n.r. |

unsuccessful substrates

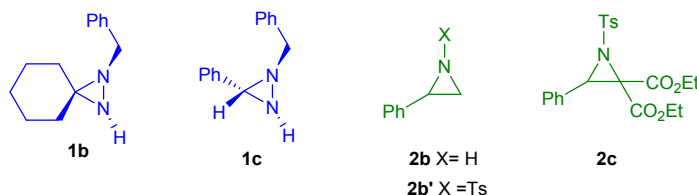

<sup>a</sup>Reaction conditions: **1a** (0.2 mmol), **2a** (0.2 mmol), catalyst (10 mol %), solvent (2 mL), 5 minutes, room temperature. <sup>b</sup>Isolated yield. n.r. = no reaction.

**General Procedure for the Synthesis of [1,2,4]-Triazines.** Diaziridine **1** (0.2 mmol), *N*-substituted aziridine **2** (0.2 mmol) and FeCl<sub>3</sub> (3 mg, 0.02 mmol) were stirred in dichloromethane (2.0 mL) at room temperature (25 °C) for 5 minutes. The reaction mixture was then diluted using dichloromethane (5 mL) and passed through a short pad of celite using dichloromethane (10 mL). Evaporation of the solvent gave a residue that was purified on silica gel column chromatography using ethyl acetate and hexane as an eluent to afford [1,2,4]-triazine motifs.

**General Procedure for the Synthesis of [1,2,4]-Triazines from cyclodimer **1i'**.** A mixture of cyclo-dimer **1i'** (0.1 mmol), *N*-alkyl aziridine **2** (0.2 mmol) and FeCl<sub>3</sub> (3 mg, 0.02 mmol) was stirred in dichloromethane (2.0 mL) at room temperature (25 °C) for 5 minutes. The purification was carried as above described in general procedure.

**General Procedure for the Enantiospecific Synthesis of [1,2,4]-Triazines.** A mixture of diaziridine **1** (0.2 mmol), (*S*)-1-benzyl-2-phenylaziridine **2p** (0.2 mmol) and FeCl<sub>3</sub> (3 mg, 0.02 mmol) was stirred in dichloromethane (2.0 mL) at room temperature (25 °C) for 5 minutes. The purification was performed as above presented in general procedure. The enantiomeric excess was determined using chiral HPLC.

## HPLC chromatograms

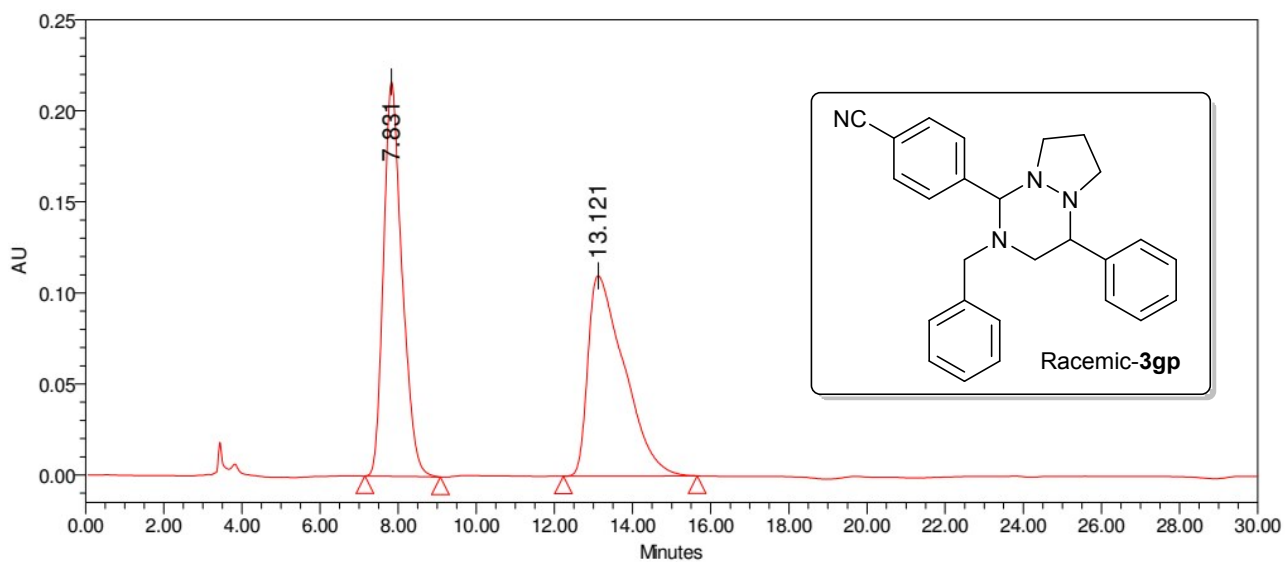

### Peak Results

|   | RT     | % Area |
|---|--------|--------|
| 1 | 7.831  | 50.09  |
| 2 | 13.121 | 49.91  |

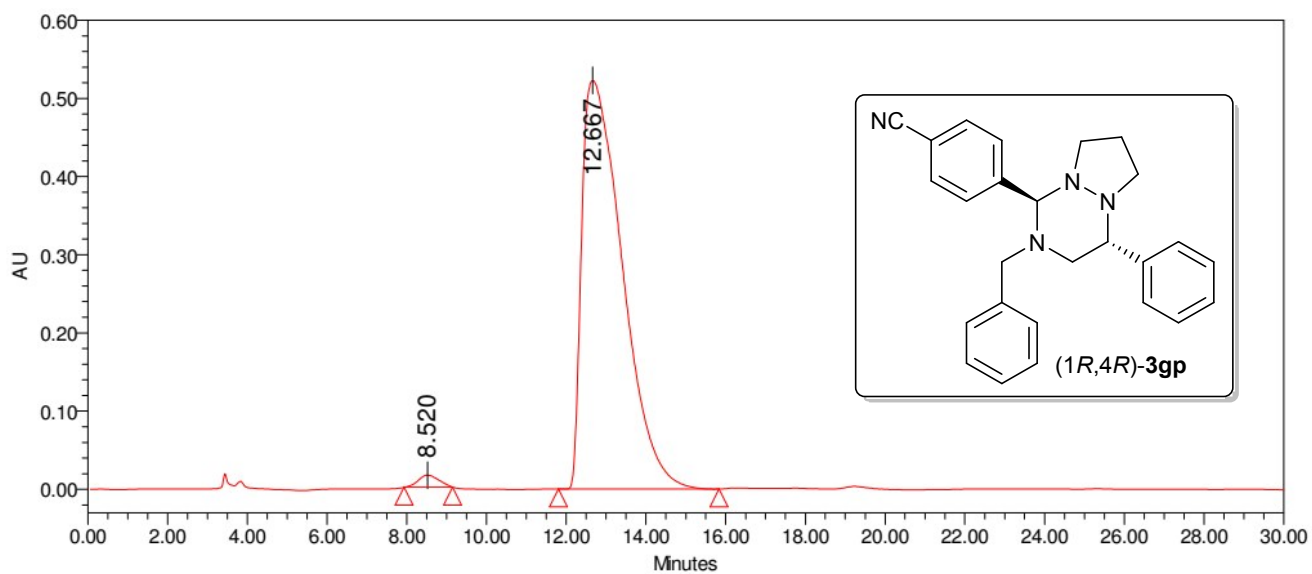

### Peak Results

|   | RT     | % Area |
|---|--------|--------|
| 1 | 8.520  | 1.49   |
| 2 | 12.667 | 98.51  |

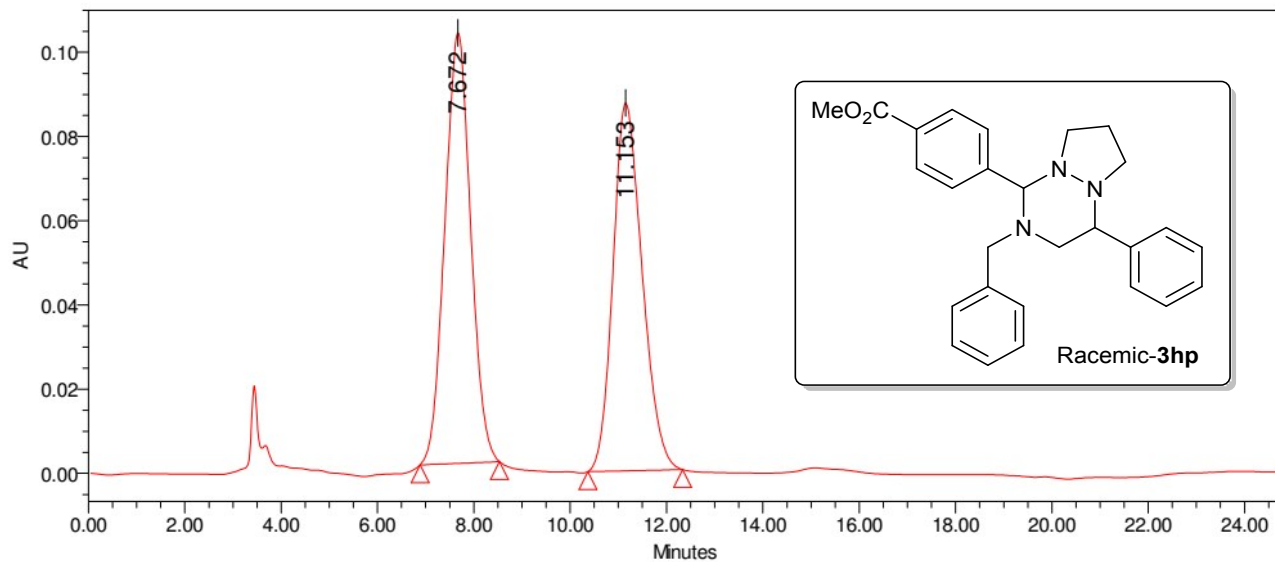

**Peak Results**

|   | RT     | % Area |
|---|--------|--------|
| 1 | 7.672  | 50.89  |
| 2 | 11.153 | 49.11  |

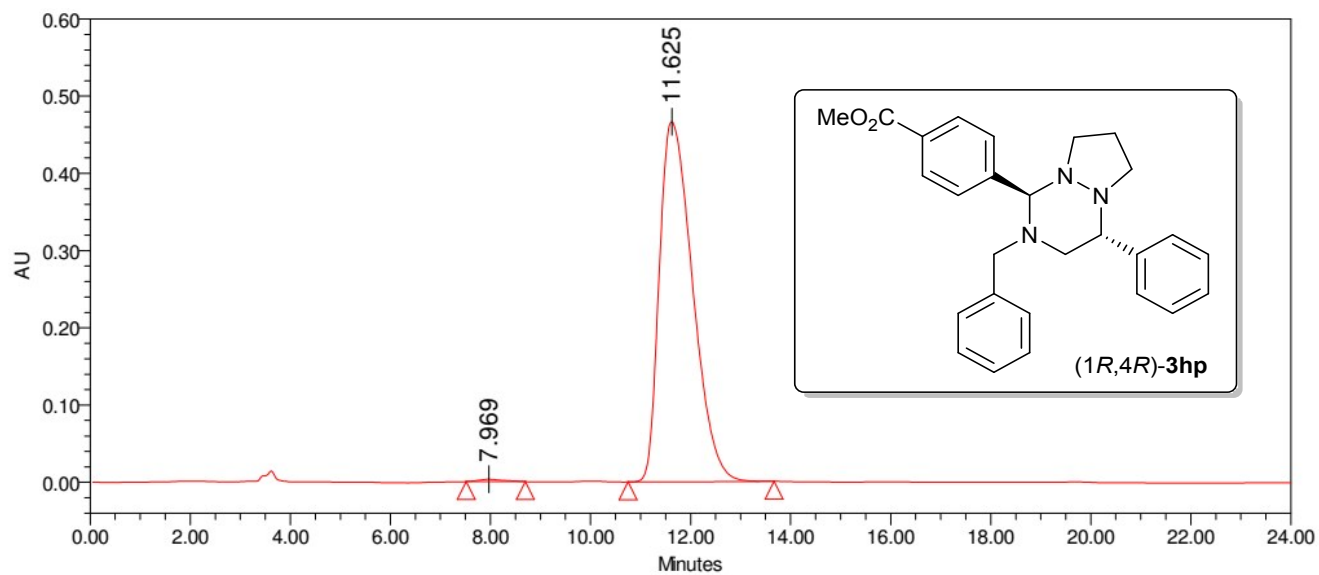

**Peak Results**

|   | RT     | % Area |
|---|--------|--------|
| 1 | 7.969  | 0.48   |
| 2 | 11.625 | 99.52  |



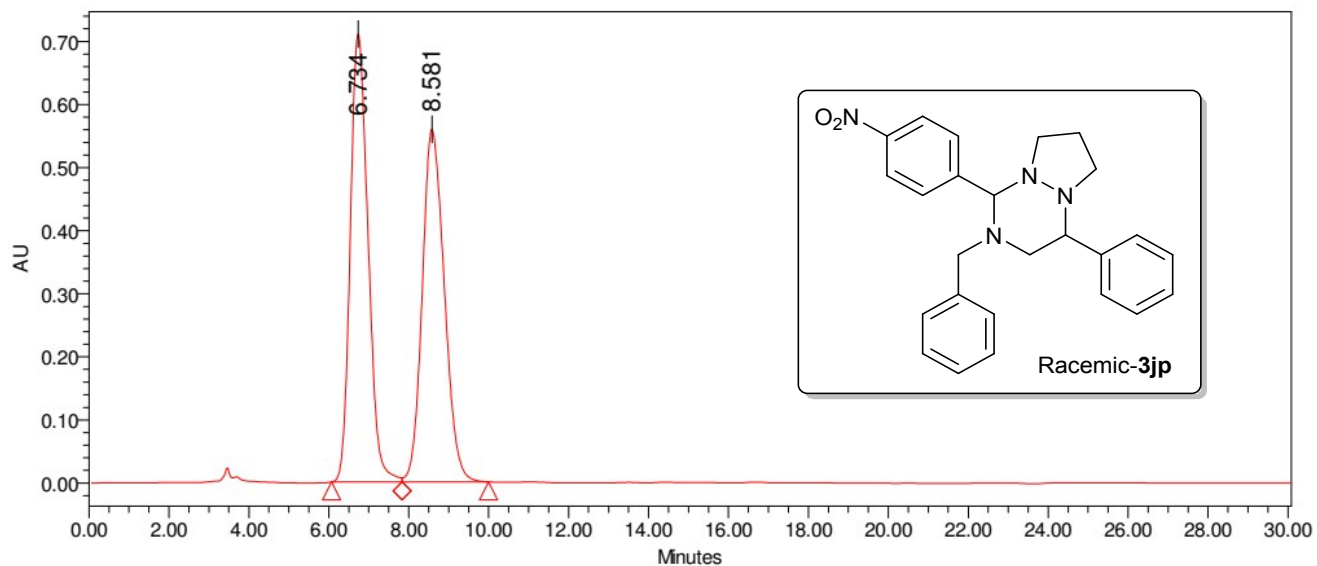

**Peak Results**

|   | RT    | % Area |
|---|-------|--------|
| 1 | 6.734 | 50.57  |
| 2 | 8.581 | 49.43  |

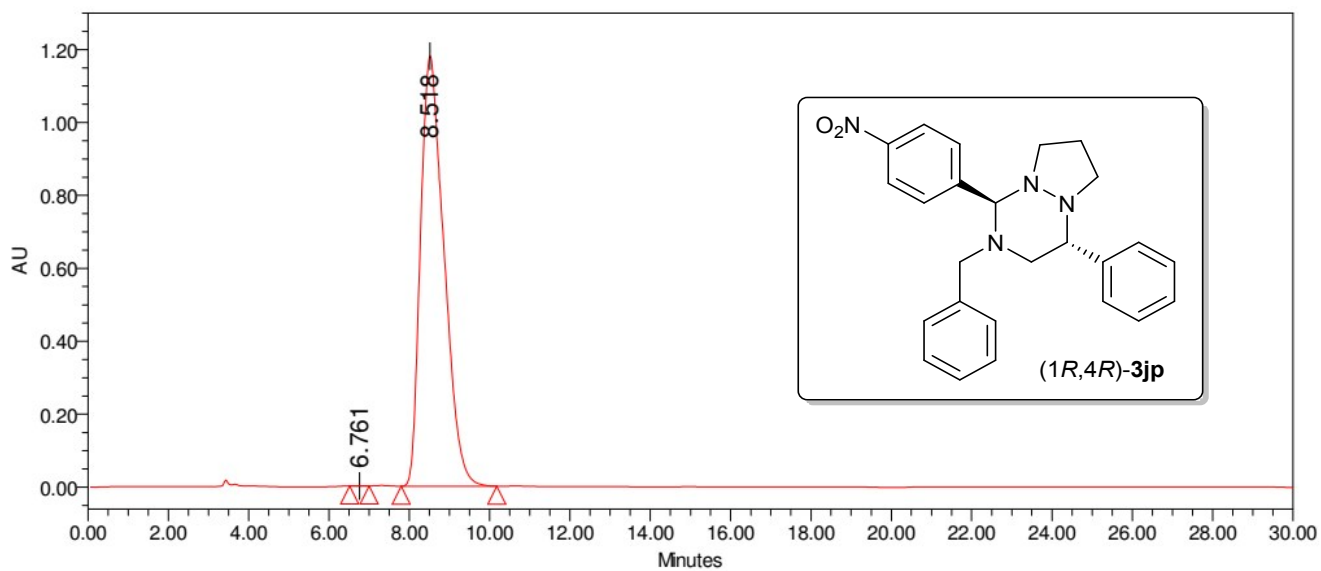

**Peak Results**

|   | RT    | % Area |
|---|-------|--------|
| 1 | 6.761 | 0.01   |
| 2 | 8.518 | 99.99  |

**General Procedure for the Asymmetric Synthesis of [1,2,4]-Triazines.** Chiral ligand **L1-3** (0.04 mmol) and FeCl<sub>3</sub> (3 mg, 0.02 mmol) were stirred in dichloromethane (2.0 mL) at room temperature (25 °C) for 1 h. Methyl-4-(1,5-diazabicyclo[3.1.0]hexan-6-yl)benzoate **1h** (44 mg, 0.2 mmol) and racemic 1-benzyl-2-phenylaziridine **2p** (42 mg, 0.2 mmol) were added and the resultant mixture was stirred at room temperature (25 °C) for 5 min. The workup and purification were performed as presented in the general procedure. The enantiomeric excess was determined using chiral HPLC analysis with Daicel Chiralcel AD column using *iso*-propanol and hexane as an eluent.

**Table S2.** Asymmetric reaction conditions<sup>a</sup>

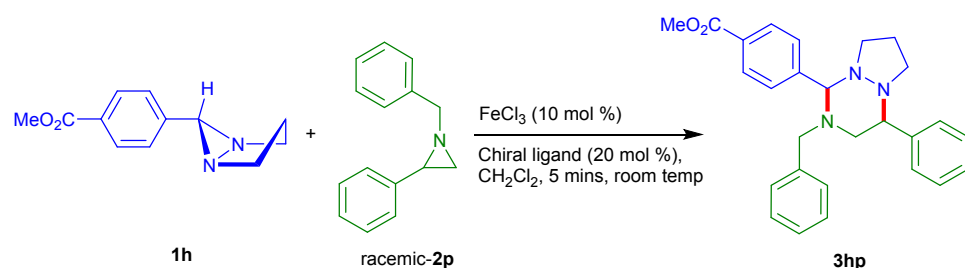

| Entry | Ligand (20 mol %) | Yield ( <b>3hp</b> , %) <sup>b</sup> | <i>ee</i> (%) <sup>c</sup> |
|-------|-------------------|--------------------------------------|----------------------------|
| 1     | <b>L1</b>         | 73                                   | 4.5                        |
| 11    | <b>L2</b>         | 81                                   | 3.0                        |
| 12    | <b>L3</b>         | 79                                   | 0                          |

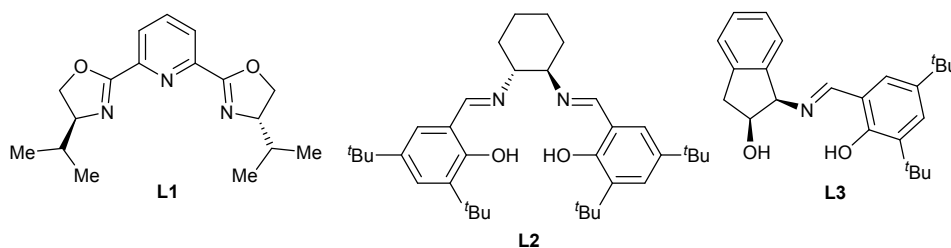

<sup>a</sup>Reaction conditions: **1h** (0.2 mmol), racemic **2p** (0.2 mmol), FeCl<sub>3</sub> (10 mol %), Chiral ligand **L** (20 mol %), CH<sub>2</sub>Cl<sub>2</sub> (2 mL), 5 minutes, room temperature. <sup>b</sup>Isolated yield. <sup>c</sup>Chiral HPLC analysis.

## HPLC chromatograms

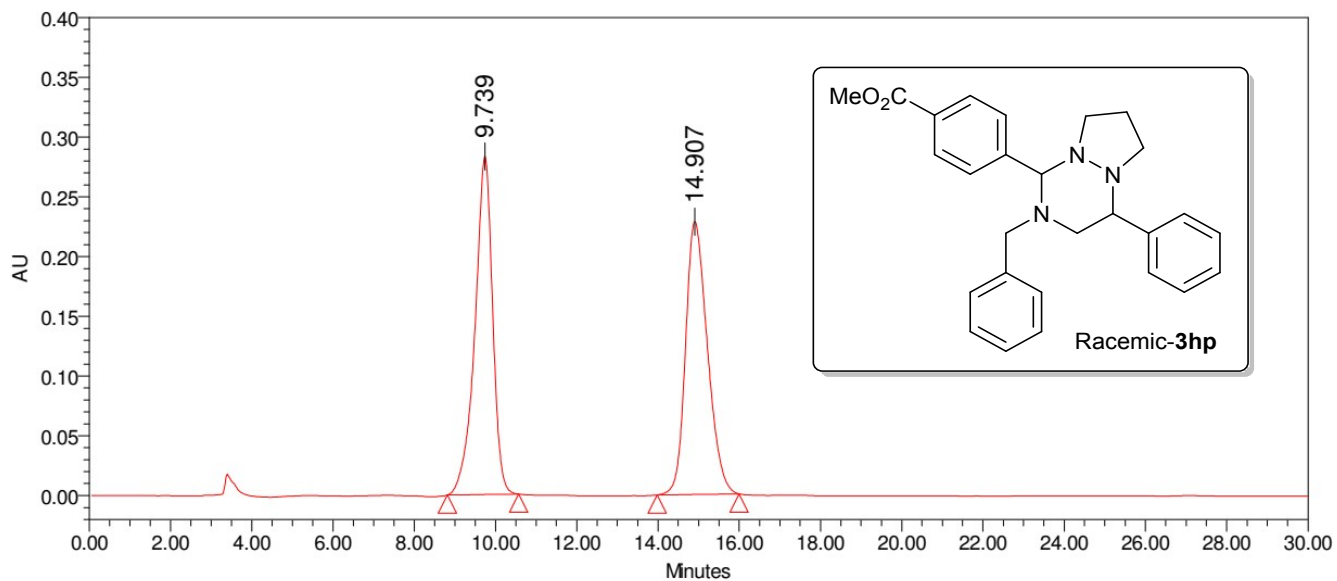

### Peak Results

|   | RT     | % Area |
|---|--------|--------|
| 1 | 9.739  | 50.01  |
| 2 | 14.907 | 49.99  |

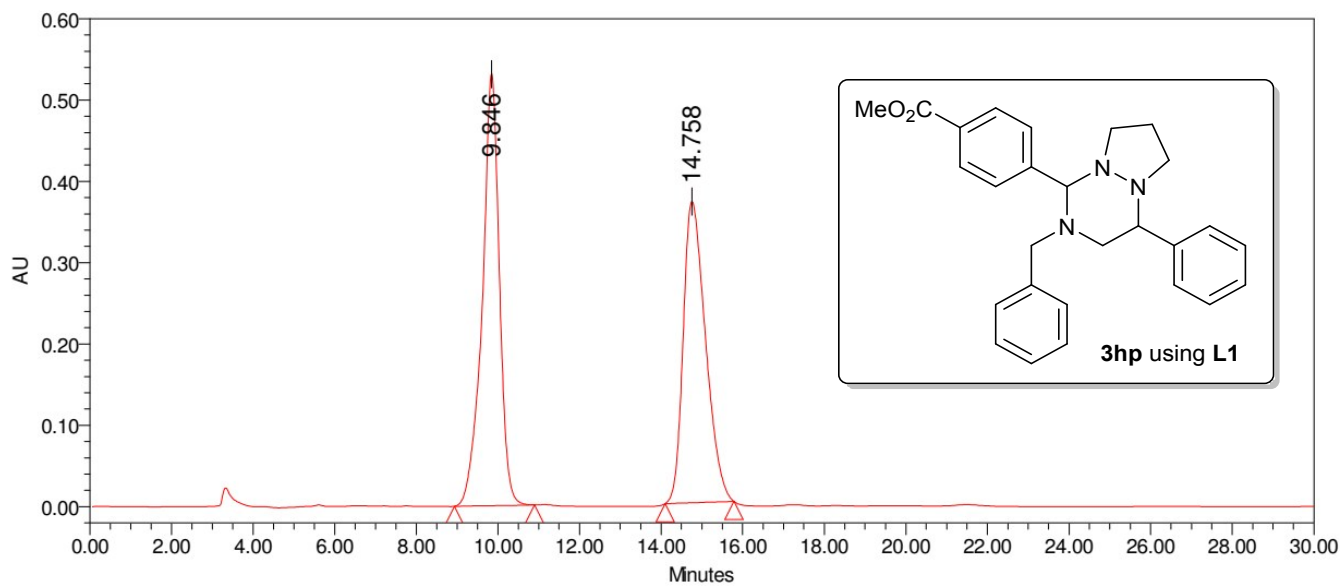

### Peak Results

|   | RT     | % Area |
|---|--------|--------|
| 1 | 9.846  | 52.26  |
| 2 | 14.758 | 47.74  |

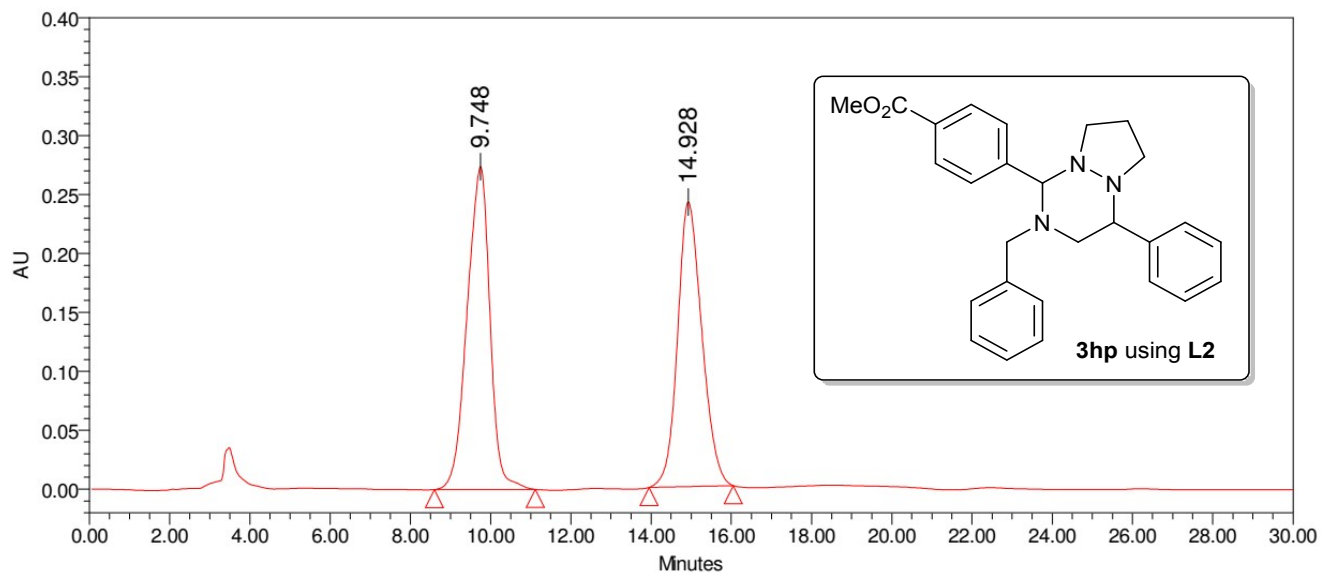

**Peak Results**

|   | RT     | % Area |
|---|--------|--------|
| 1 | 9.748  | 51.53  |
| 2 | 14.928 | 48.47  |

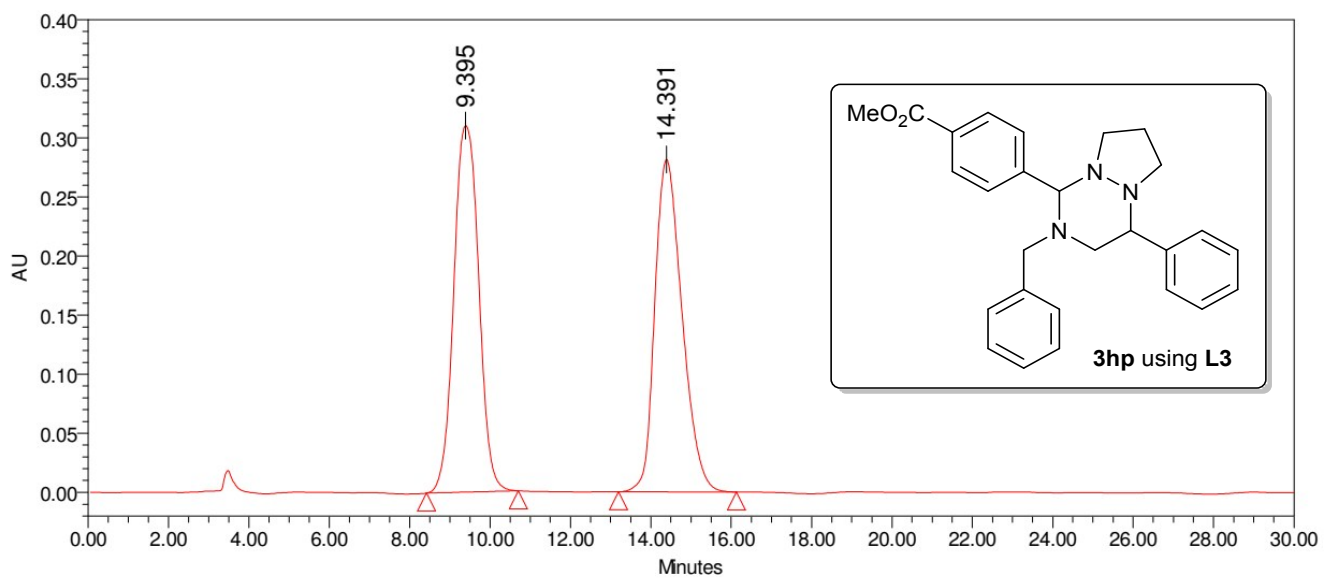

**Peak Results**

|   | RT     | % Area |
|---|--------|--------|
| 1 | 9.395  | 50.22  |
| 2 | 14.391 | 49.78  |

## Characterization Data

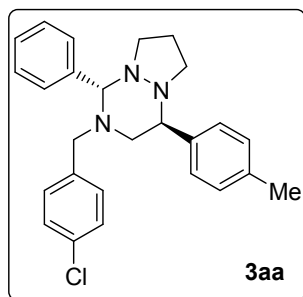

### 2-(4-Chlorobenzyl)-1-phenyl-4-(*p*-tolyl)hexahydro-6H-pyrazolo[1,2-*a*][1,2,4]triazine **3aa**.

Analytical TLC on silica gel, 1:24 ethyl acetate/hexane  $R_f = 0.52$ ; colorless solid; mp 138-139 °C; yield 95% (79 mg);  $^1\text{H}$  NMR (400 MHz,  $\text{CDCl}_3$ )  $\delta$  7.55-7.53 (m, 2H), 7.32-7.24 (m, 3H), 7.19-7.17 (m, 2H), 7.10-7.05 (m, 4H), 7.03 (d,  $J = 7.6$  Hz, 2H), 3.72 (s, 1H), 3.55-3.51 (m, 2H), 2.83-2.77 (m, 3H), 2.44-2.38 (m, 1H), 2.37-2.32 (m, 1H), 2.30-2.23 (m, 5H), 1.71-1.63 (m, 2H);  $^{13}\text{C}$  NMR (100 MHz,  $\text{CDCl}_3$ )  $\delta$  139.4, 137.59, 137.54, 137.1, 132.4, 130.0, 129.19, 129.15, 128.9, 128.6, 128.3, 127.9, 89.7, 68.0, 59.1, 56.6, 51.9, 50.8, 22.0, 21.2; FT-IR (KBr) 2824, 2768, 1514, 1451, 1355, 1127, 1017  $\text{cm}^{-1}$ ; HRMS (ESI)  $m/z$   $[\text{M}+\text{H}]^+$  calcd for  $\text{C}_{26}\text{H}_{29}\text{ClN}_3$ : 418.2045, found: 418.2044.

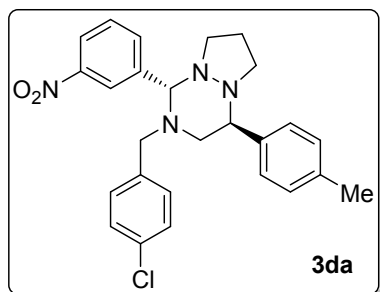

### 2-(4-Chlorobenzyl)-1-(3-nitrophenyl)-4-(*p*-tolyl)hexahydro-6H-pyrazolo[1,2-*a*][1,2,4]triazine **3da**.

Analytical TLC on silica gel, 1:24 ethyl acetate/hexane  $R_f = 0.50$ ; thick liquid; yield 83% (76 mg);  $^1\text{H}$  NMR (400 MHz,  $\text{CDCl}_3$ )  $\delta$  8.41 (s, 1H), 8.15-8.12 (m, 1H), 7.93-7.91 (m, 1H), 7.49 (t,  $J = 8.0$  Hz, 1H), 7.19-7.17 (m, 2H), 7.11-7.09 (m, 2H), 7.04-7.02 (m, 4H), 3.84 (s, 1H), 3.55-3.51 (m, 1H), 3.44 (d,  $J = 13.2$  Hz, 1H), 2.89-2.79 (m, 3H), 2.41-2.20 (m, 7H), 1.73-1.65 (m, 2H);  $^{13}\text{C}$  NMR (100 MHz,  $\text{CDCl}_3$ )  $\delta$  148.5, 142.1, 137.7, 136.8, 135.3, 132.8, 129.8, 129.6, 129.2, 128.5, 127.9, 124.3, 124.0, 88.5, 67.8, 58.9, 56.7, 51.9, 50.8, 22.0, 21.2; FT-IR (neat) 2830, 1633,

1530, 1352, 1129, 1092, 1014  $\text{cm}^{-1}$ ; HRMS (ESI)  $m/z$   $[M+H]^+$  calcd for  $\text{C}_{26}\text{H}_{28}\text{ClN}_4\text{O}_2$ : 463.1895, found: 463.1896.

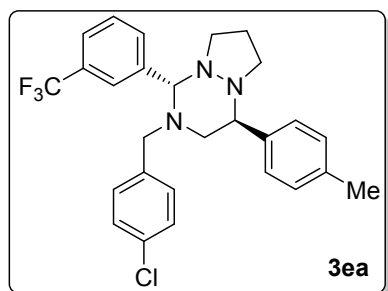

**2-(4-Chlorobenzyl)-4-(*p*-tolyl)-1-(3-(trifluoromethyl)phenyl)hexahydro-6H-pyrazolo[1,2-a][1,2,4]triazine 3ea.** Analytical TLC on silica gel, 1:24 ethyl acetate/hexane  $R_f$  = 0.48; thick liquid; yield 85% (82 mg);  $^1\text{H}$  NMR (400 MHz,  $\text{CDCl}_3$ )  $\delta$  7.82-7.76 (m, 2H), 7.55 (d,  $J$  = 8.0 Hz, 1H), 7.43 (t,  $J$  = 7.6 Hz, 1H), 7.19-7.17 (m, 2H), 7.11-7.08 (m, 2H), 7.04-7.02 (m, 4H), 3.78 (s, 1H), 3.54-3.51 (m, 1H), 3.45 (d,  $J$  = 13.2 Hz, 1H), 2.84-2.78 (m, 3H), 2.42-2.36 (m, 1H), 2.35-2.28 (m, 2H), 2.26-2.21 (m, 4H), 1.72-1.65 (m, 2H);  $^{13}\text{C}$  NMR (100 MHz,  $\text{CDCl}_3$ )  $\delta$  140.8, 137.7, 137.1, 136.9, 132.7, 132.6, 131.5 ( $J_{\text{C-F}}$  = 32.3 Hz), 129.9, 129.2, 129.1, 128.4, 128.2 ( $J_{\text{C-F}}$  = 270.6 Hz), 127.9, 126.1 ( $J_{\text{C-F}}$  = 3.0 Hz), 125.9 ( $J_{\text{C-F}}$  = 3.7 Hz), 89.0, 67.9, 59.0, 56.7, 51.9, 50.8, 22.0, 21.2;  $^{19}\text{F}$  NMR (377 MHz,  $\text{CDCl}_3$ )  $\delta$  -62.3; FT-IR (neat) 2829, 1638, 1514, 1490, 1324, 1165, 1128, 1071  $\text{cm}^{-1}$ ; HRMS (ESI)  $m/z$   $[M+H]^+$  calcd for  $\text{C}_{27}\text{H}_{28}\text{ClF}_3\text{N}_3$ : 486.1918, found: 486.1912.

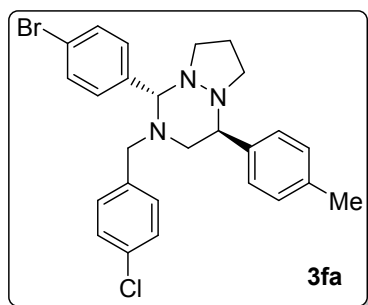

**1-(4-Bromophenyl)-2-(4-chlorobenzyl)-4-(*p*-tolyl)hexahydro-6H-pyrazolo[1,2-a][1,2,4]triazine 3fa.** Analytical TLC on silica gel, 1:24 ethyl acetate/hexane  $R_f$  = 0.52; colorless solid; mp 162-163°C; yield 91% (90 mg);  $^1\text{H}$  NMR (400 MHz,  $\text{CDCl}_3$ )  $\delta$  7.44 (s, 4H), 7.18-7.16 (m, 2H), 7.11-7.09 (m, 2H), 7.05-7.01 (m, 4H), 3.68 (s, 1H), 3.50-3.47 (m, 2H), 2.81-2.76 (m, 3H), 2.44-2.39 (m, 1H), 2.33-2.20 (m, 6H), 1.71-1.64 (m, 2H);  $^{13}\text{C}$  NMR (100 MHz,  $\text{CDCl}_3$ )  $\delta$  138.6, 137.6,

137.2, 137.0, 132.6, 131.8, 130.8, 129.9, 129.1, 128.4, 127.9, 122.8, 88.9, 68.0, 59.0, 56.6, 51.9, 50.8, 22.0, 21.2; FT-IR (KBr) 2827, 1638, 1591, 1488, 1314, 1128, 1012  $\text{cm}^{-1}$ ; HRMS (ESI)  $m/z$   $[\text{M}+\text{H}]^+$  calcd for  $\text{C}_{26}\text{H}_{28}\text{BrClN}_3$ : 496.1150, found: 496.1157.

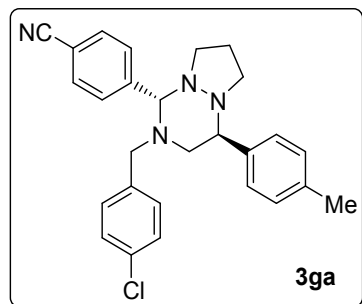

**4-(2-(4-Chlorobenzyl)-4-(*p*-tolyl)hexahydro-6H-pyrazolo[1,2-a][1,2,4]triazin-1-yl)benzotrile 3ga.** Analytical TLC on silica gel, 1:16 ethyl acetate/hexane  $R_f = 0.48$ ; colorless solid; mp 180-181  $^{\circ}\text{C}$ ; yield 77% (68 mg);  $^1\text{H}$  NMR (400 MHz,  $\text{CDCl}_3$ )  $\delta$  7.77-7.75 (m, 2H), 7.70 – 7.67 (m, 2H), 7.25 (d,  $J = 8.0$  Hz, 2H), 7.20-7.16 (m, 2H), 7.11-7.09 (m, 4H), 3.84 (s, 1H), 3.59-3.56 (m, 1H), 3.49 (d,  $J = 13.2$  Hz, 1H), 2.93-2.84 (m, 3H), 2.46-2.40 (m, 1H), 2.38-2.26 (m, 6H), 1.80-1.72 (m, 2H);  $^{13}\text{C}$  NMR (100 MHz,  $\text{CDCl}_3$ )  $\delta$  145.0, 137.7, 136.7, 132.8, 132.4, 130.0, 129.8, 129.2, 128.5, 127.9, 118.6, 112.8, 88.8, 67.9, 58.8, 56.6, 51.8, 50.7, 22.0, 21.2; FT-IR (KBr) 2830, 2228, 1609, 1543, 1489, 1300, 1128, 1015  $\text{cm}^{-1}$ ; HRMS (ESI)  $m/z$   $[\text{M}+\text{H}]^+$  calcd for  $\text{C}_{27}\text{H}_{28}\text{ClN}_4$ : 443.1997, found: 443.1998.

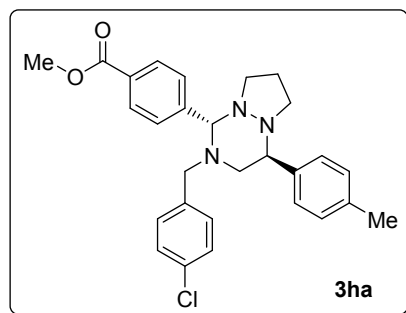

**Methyl 4-(2-(4-chlorobenzyl)-4-(*p*-tolyl)hexahydro-6H-pyrazolo[1,2-a][1,2,4]triazin-1-yl)benzoate 3ha.** Analytical TLC on silica gel, 1:16 ethyl acetate/hexane  $R_f = 0.46$ ; colorless solid; mp 184-185  $^{\circ}\text{C}$ ; yield 82% (78 mg);  $^1\text{H}$  NMR (400 MHz,  $\text{CDCl}_3$ )  $\delta$  8.00-7.98 (m, 2H), 7.65-7.63 (m, 2H), 7.19-7.17 (m, 2H), 7.10-7.08 (m, 2H), 7.05-7.01 (m, 4H), 3.84 (s, 3H), 3.77 (s, 1H), 3.54-3.50 (m, 1H), 3.46 (d,  $J = 13.6$  Hz, 1H), 2.83-2.77 (m, 3H), 2.41-2.35 (m, 1H), 2.33-2.21 (m, 6H),

1.71-1.64 (m, 2H);  $^{13}\text{C}$  NMR (100 MHz,  $\text{CDCl}_3$ )  $\delta$  166.9, 144.6, 137.6, 137.1, 136.9, 132.6, 130.8, 130.0, 129.9, 129.3, 129.1, 128.4, 127.9, 89.1, 68.0, 58.9, 56.6, 52.3, 51.8, 50.7, 22.0, 21.2; FT-IR (KBr) 2822, 1722, 1611, 1432, 1276, 1102, 1014  $\text{cm}^{-1}$ ; HRMS (ESI)  $m/z$   $[\text{M}+\text{H}]^+$  calcd for  $\text{C}_{28}\text{H}_{31}\text{ClN}_3\text{O}_2$ : 476.2099, found: 476.2116.

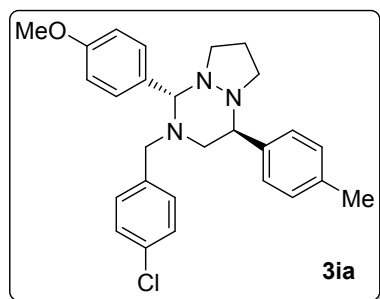

**2-(4-Chlorobenzyl)-1-(4-methoxyphenyl)-4-(p-tolyl)hexahydro-6H-pyrazolo[1,2-a][1,2,4]triazine 3ia.** Analytical TLC on silica gel, 1:16 ethyl acetate/hexane  $R_f$  = 0.46; colorless solid; mp 169-170  $^\circ\text{C}$ ; yield 94% (84 mg);  $^1\text{H}$  NMR (400 MHz,  $\text{CDCl}_3$ )  $\delta$  7.46-7.45 (m, 2H), 7.19-7.17 (m, 2H), 7.10-7.05 (m, 4H), 7.03 (d,  $J$  = 8.0 Hz, 2H), 6.84 (d,  $J$  = 8.8 Hz, 2H), 3.73 (s, 3H), 3.68 (s, 1H), 3.58-3.50 (m, 2H), 2.83-2.77 (m, 3H), 2.47-2.42 (m, 1H), 2.36-2.23 (m, 6H), 1.71-1.64 (m, 2H);  $^{13}\text{C}$  NMR (100 MHz,  $\text{CDCl}_3$ )  $\delta$  160.0, 137.67, 137.60, 137.1, 132.4, 131.5, 130.2, 130.0, 129.1, 128.3, 127.9, 113.9, 89.1, 68.1, 59.1, 56.5, 55.3, 52.0, 50.8, 21.9, 21.2; FT-IR (KBr) 2825, 1611, 1510, 1239, 1126  $\text{cm}^{-1}$ ; HRMS (ESI)  $m/z$   $[\text{M}+\text{H}]^+$  calcd for  $\text{C}_{27}\text{H}_{31}\text{ClN}_3\text{O}$ : 448.2150, found: 448.2164.

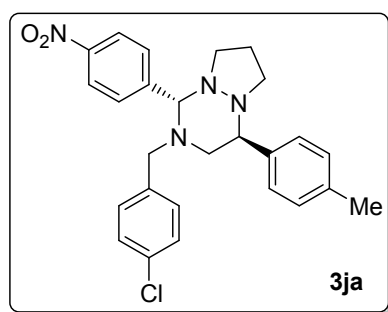

**2-(4-Chlorobenzyl)-1-(4-nitrophenyl)-4-(p-tolyl)hexahydro-6H-pyrazolo[1,2-a][1,2,4]triazine 3ja.** Analytical TLC on silica gel, 1:16 ethyl acetate/hexane  $R_f$  = 0.42; yellow solid; mp 122-123  $^\circ\text{C}$ ; yield 79% (73 mg);  $^1\text{H}$  NMR (400 MHz,  $\text{CDCl}_3$ )  $\delta$  8.19-8.17 (m, 2H), 7.77-7.75 (m, 2H), 7.19-7.16 (m, 2H), 7.12-7.09 (m, 2H), 7.04-7.02 (m, 4H), 3.82 (s, 1H), 3.53-3.50 (m, 1H), 3.41 (d,  $J$  = 13.6 Hz, 1H), 2.87-2.78 (m, 3H), 2.39-2.19 (m, 7H), 1.73-1.65 (m, 2H);  $^{13}\text{C}$  NMR (100 MHz,



CDCl<sub>3</sub>)  $\delta$  148.4, 147.0, 137.8, 136.78, 136.71, 132.9, 130.2, 129.8, 129.2, 128.5, 127.9, 123.8, 88.5, 67.9, 58.8, 56.6, 51.8, 50.7, 22.0, 21.2; FT-IR (KBr) 2964, 2828, 1607, 1519, 1489, 1342, 1127, 1014 cm<sup>-1</sup>; HRMS (ESI)  $m/z$  [M+H]<sup>+</sup> calcd for C<sub>26</sub>H<sub>28</sub>ClN<sub>4</sub>O<sub>2</sub>: 463.1895, found: 463.1892.

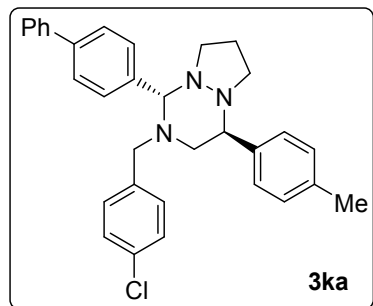

**1-((1,1'-Biphenyl)-4-yl)-2-(4-chlorobenzyl)-4-(*p*-tolyl)hexahydro-6H-pyrazolo[1,2-*a*][1,2,4]-triazine 3ka.** Analytical TLC on silica gel, 1:24 ethyl acetate/hexane  $R_f$  = 0.48; colorless solid; mp 158-159 °C; yield 92% (90 mg); <sup>1</sup>H NMR (400 MHz, CDCl<sub>3</sub>)  $\delta$  7.61-7.59 (m, 2H), 7.54-7.51 (m, 4H), 7.37-7.33 (m, 2H), 7.27-7.23 (m, 1H), 7.20-7.16 (m, 2H), 7.09 (s, 4H), 7.03 (d,  $J$  = 8.0 Hz, 2H), 3.76 (s, 1H), 3.62 (d,  $J$  = 13.2 Hz, 1H), 3.56-3.52 (m, 1H), 2.85-2.79 (m, 3H), 2.52-2.47 (m, 1H), 2.40-2.33 (m, 1H), 2.30-2.25 (m, 2H), 2.23 (s, 3H), 1.72-1.64 (m, 2H); <sup>13</sup>C NMR (100 MHz, CDCl<sub>3</sub>)  $\delta$  141.7, 140.8, 138.5, 137.6, 137.5, 137.1, 132.5, 130.0, 129.5, 129.1, 128.9, 128.3, 127.9, 127.5, 127.3, 127.2, 89.4, 68.1, 59.1, 56.7, 51.9, 50.8, 22.0, 21.2; FT-IR (KBr) 2824, 1511, 1487, 1314, 1129, 1014 cm<sup>-1</sup>; HRMS (ESI)  $m/z$  [M+H]<sup>+</sup> calcd for C<sub>32</sub>H<sub>33</sub>ClN<sub>3</sub>: 494.2358, found: 494.2368.

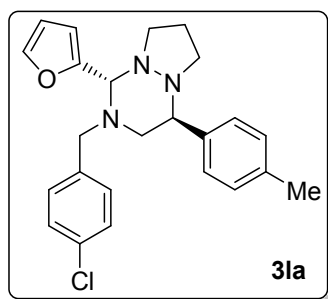

**2-(4-Chlorobenzyl)-1-(furan-2-yl)-4-(*p*-tolyl)hexahydro-6H-pyrazolo[1,2-*a*][1,2,4]triazine 3la.** Analytical TLC on silica gel, 1:24 ethyl acetate/hexane  $R_f$  = 0.48; colorless solid; mp 123-124 °C; yield 91% (74 mg); <sup>1</sup>H NMR (400 MHz, CDCl<sub>3</sub>)  $\delta$  7.388-7.383 (m, 1H), 7.18-7.09 (m, 6H), 7.02 (d,  $J$  = 8.0 Hz, 2H), 6.44-6.43 (m, 1H), 6.29-6.28 (m, 1H), 3.90 (s, 1H), 3.60-3.53 (m, 2H),

2.96 (d,  $J = 13.2$  Hz, 1H), 2.82-2.74 (m, 2H), 2.65-2.59 (m, 1H), 2.40-2.33 (m, 1H), 2.31-2.21 (m, 5H), 1.77-1.68 (m, 2H);  $^{13}\text{C}$  NMR (100 MHz,  $\text{CDCl}_3$ )  $\delta$  151.4, 142.8, 137.6, 137.2, 136.9, 132.5, 130.2, 129.1, 128.3, 127.9, 110.4, 110.1, 82.2, 67.6, 58.9, 56.5, 51.9, 50.4, 21.9, 21.2; FT-IR (KBr) 2846, 2823, 2736, 1491, 1336, 1151, 1128, 1077  $\text{cm}^{-1}$ ; HRMS (ESI)  $m/z$   $[\text{M}+\text{H}]^+$  calcd for  $\text{C}_{24}\text{H}_{27}\text{ClN}_3\text{O}$ : 408.1837, found: 408.1856.

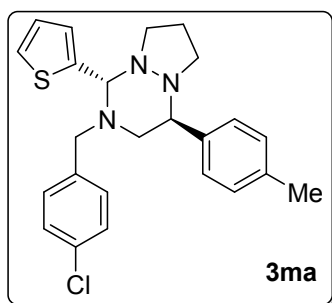

**2-(4-Chlorobenzyl)-1-(thiophen-2-yl)-4-(p-tolyl)hexahydro-6H-pyrazolo[1,2-a][1,2,4]triazine 3ma.** Analytical TLC on silica gel, 1:24 ethyl acetate/hexane  $R_f = 0.46$ ; thick liquid; yield 93% (79 mg);  $^1\text{H}$  NMR (400 MHz,  $\text{CDCl}_3$ )  $\delta$  7.30 (d,  $J = 4.8$  Hz, 1H), 7.18-7.15 (m, 2H), 7.14-7.08 (m, 5H), 7.02 (d,  $J = 8.0$  Hz, 2H), 6.90-6.88 (m, 1H), 4.03 (s, 1H), 3.71 (d,  $J = 13.2$  Hz, 1H), 3.55-3.51 (m, 1H), 2.84-2.786 (m, 2H), 2.781-2.74 (m, 1H), 2.62-2.57 (m, 1H), 2.40-2.32 (m, 1H), 2.30-2.23 (m, 5H), 1.74-1.67 (m, 2H);  $^{13}\text{C}$  NMR (100 MHz,  $\text{CDCl}_3$ )  $\delta$  143.3, 137.6, 137.3, 136.9, 132.6, 130.1, 129.1, 128.3, 127.9, 127.2, 126.9, 125.8, 84.5, 67.8, 59.0, 56.6, 52.1, 51.0, 21.8, 21.2; FT-IR (neat) 2973, 2826, 1591, 1488, 1291, 1127, 1012  $\text{cm}^{-1}$ ; HRMS (ESI)  $m/z$   $[\text{M}+\text{H}]^+$  calcd for  $\text{C}_{24}\text{H}_{27}\text{ClN}_3\text{S}$ : 424.1609, found: 424.1608.

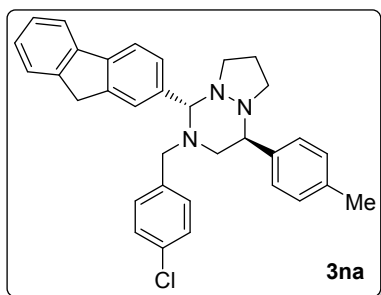

**2-(4-Chlorobenzyl)-1-(9H-fluoren-2-yl)-4-(p-tolyl)hexahydro-6H-pyrazolo[1,2-a][1,2,4]triazine 3na.** Analytical TLC on silica gel, 1:24 ethyl acetate/hexane  $R_f = 0.46$ ; colorless solid; mp 189-190  $^{\circ}\text{C}$ ; yield 89% (90 mg);  $^1\text{H}$  NMR (400 MHz,  $\text{CDCl}_3$ )  $\delta$  7.81-7.68 (m, 3H), 7.50-7.44 (m, 2H), 7.29-7.25 (m, 1H), 7.22-7.18 (m, 3H), 7.09-7.07 (m, 4H), 7.03 (d,  $J = 7.6$  Hz, 2H), 3.84 (s,

2H), 3.78 (s, 1H), 3.62 (d,  $J = 13.2$  Hz, 1H), 3.56-3.53 (m, 1H), 2.84-2.79 (m, 3H), 2.49-2.44 (m, 1H), 2.41-2.34 (m, 1H), 2.31-2.26 (m, 2H), 2.22 (s, 3H), 1.70-1.63 (m, 2H);  $^{13}\text{C}$  NMR (100 MHz,  $\text{CDCl}_3$ )  $\delta$  143.7, 143.6, 142.5, 141.3, 138.0, 137.59, 137.56, 137.1, 132.4, 130.0, 129.1, 128.3, 127.9, 126.9, 126.8, 125.4, 125.1, 120.0, 119.8, 89.8, 68.2, 59.1, 56.7, 51.9, 50.9, 36.9, 22.0, 21.2; FT-IR (KBr) 2852, 2819, 1723, 1613, 1513, 1123  $\text{cm}^{-1}$ ; HRMS (ESI)  $m/z$   $[\text{M}+\text{H}]^+$  calcd for  $\text{C}_{33}\text{H}_{33}\text{ClN}_3$ : 506.2358, found: 506.2376.

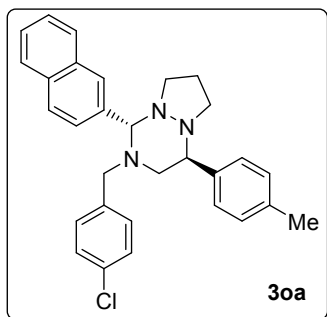

**2-(4-Chlorobenzyl)-1-(naphthalen-2-yl)-4-(p-tolyl)hexahydro-6H-pyrazolo[1,2-a][1,2,4]triazine 30a.** Analytical TLC on silica gel, 1:24 ethyl acetate/hexane  $R_f = 0.52$ ; colorless solid; mp 177-178  $^{\circ}\text{C}$ ; yield 88% (82 mg);  $^1\text{H}$  NMR (400 MHz,  $\text{CDCl}_3$ )  $\delta$  8.01 (s, 1H), 7.91-7.84 (m, 4H), 7.53-7.48 (m, 2H), 7.31 (d,  $J = 7.6$  Hz, 2H), 7.18-7.11 (m, 6H), 3.97 (s, 1H), 3.71-3.62 (m, 2H), 2.94 – 2.89 (m, 3H), 2.54-2.44 (m, 2H), 2.43-2.36 (m, 2H), 2.33 (s, 3H), 1.80-1.72 (m, 2H);  $^{13}\text{C}$  NMR (100 MHz,  $\text{CDCl}_3$ )  $\delta$  137.6, 137.4, 137.1, 137.0, 133.9, 133.2, 132.5, 130.0, 129.1, 128.65, 128.62, 128.3, 128.1, 128.0, 127.8, 126.3, 126.2, 89.8, 68.1, 59.1, 56.7, 52.0, 50.9, 22.0, 21.2; FT-IR (KBr) 2823, 2800, 1489, 1289, 1139, 1092, 1014  $\text{cm}^{-1}$ ; HRMS (ESI)  $m/z$   $[\text{M}+\text{H}]^+$  calcd for  $\text{C}_{30}\text{H}_{31}\text{ClN}_3$ : 468.2201, found: 468.2204.

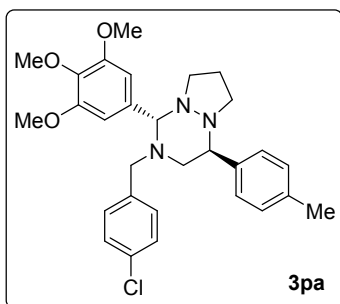

**2-(4-Chlorobenzyl)-4-(p-tolyl)-1-(3,4,5-trimethoxyphenyl)hexahydro-6H-pyrazolo[1,2-a][1,2,4]triazine 3pa.** Analytical TLC on silica gel, 1:16 ethyl acetate/hexane  $R_f = 0.44$ ; colorless

solid; mp 159-160 °C; yield 92% (93 mg);  $^1\text{H}$  NMR (400 MHz,  $\text{CDCl}_3$ )  $\delta$  7.19-7.17 (m, 2H), 7.12-7.07 (m, 4H), 7.05-7.01 (m, 2H), 6.77 (s, 2H), 3.82 (s, 6H), 3.77 (s, 3H), 3.62-3.51 (m, 3H), 2.83-2.77 (m, 3H), 2.54-2.49 (m, 1H), 2.36-2.32 (m, 1H), 2.30-2.23 (m, 5H), 1.73-1.65 (m, 2H);  $^{13}\text{C}$  NMR (100 MHz,  $\text{CDCl}_3$ )  $\delta$  153.2, 138.2, 137.6, 137.5, 137.0, 134.9, 132.5, 129.8, 129.1, 128.3, 127.9, 106.8, 105.9, 90.0, 67.8, 60.9, 59.3, 56.6, 56.3, 51.9, 50.7, 22.0, 21.2; FT-IR (KBr) 2829, 1592, 1504, 1490, 1462, 1356, 1230, 1127, 1013  $\text{cm}^{-1}$ ; HRMS (ESI)  $m/z$   $[\text{M}+\text{H}]^+$  calcd for  $\text{C}_{29}\text{H}_{35}\text{ClN}_3\text{O}_3$ : 508.2361, found: 508.2369.

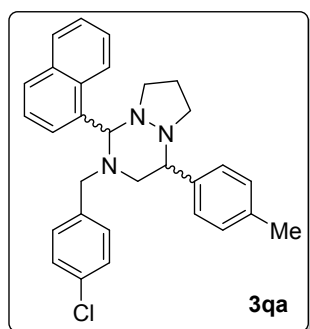

**2-(4-Chlorobenzyl)-1-(naphthalen-1-yl)-4-(*p*-tolyl)hexahydro-6H-pyrazolo[1,2-*a*][1,2,4]triazine 3qa.** Analytical TLC on silica gel, 1:16 ethyl acetate/hexane  $R_f$  = 0.48; thick liquid; yield 82% (76 mg);  $^1\text{H}$  NMR (400 MHz,  $\text{CDCl}_3$ )  $\delta$  9.64 (d,  $J$  = 8.4 Hz, 1H), 8.38 (d,  $J$  = 8.4 Hz, 0.57H), 8.18-8.16 (m, 0.57H), 7.82-7.73 (m, 3.23H), 7.52-7.40 (m, 5H), 7.32-7.15 (m, 5.01H), 7.11-6.97 (m, 8H), 6.88 (d,  $J$  = 8.4 Hz, 2.01H), 4.80 (s, 0.59H), 4.06 (s, 1H), 3.68-3.65 (m, 1.02H), 3.63-3.59 (m, 0.58H), 3.55 – 3.43 (m, 0.97H), 3.36 (d,  $J$  = 13.2 Hz, 1H), 2.90-2.73 (m, 5H), 2.46-2.19 (m, 12.02H), 1.69-1.56 (m, 4.01H);  $^{13}\text{C}$  NMR (100 MHz,  $\text{CDCl}_3$ )  $\delta$  137.64, 137.62, 137.5, 137.3, 137.1, 135.1, 134.9, 134.5, 133.6, 132.7, 132.4, 132.3, 131.6, 130.3, 129.9, 129.6, 129.2, 129.1, 128.8, 128.7, 128.5, 128.2, 128.1, 128.0, 127.8, 127.0, 126.2, 126.07, 126.02, 125.5, 125.0, 124.7, 122.7, 93.1, 81.9, 68.6, 67.8, 59.4, 57.2, 56.0, 52.3, 51.9, 50.7, 50.1, 29.8, 22.2, 21.9, 21.28, 21.25; FT-IR (KBr) 2853, 2828, 1634, 1512, 1489, 1128, 1014  $\text{cm}^{-1}$ ; HRMS (ESI)  $m/z$   $[\text{M}+\text{H}]^+$  calcd for  $\text{C}_{30}\text{H}_{31}\text{ClN}_3$ : 468.2201, found: 468.2209.

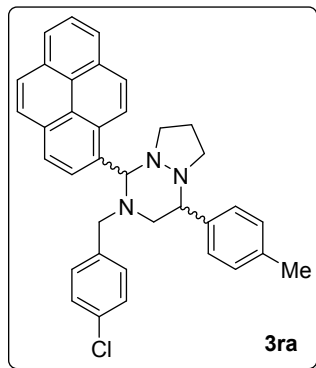

**2-(4-Chlorobenzyl)-1-(pyren-1-yl)-4-(*p*-tolyl)hexahydro-6H-pyrazolo[1,2-a][1,2,4]triazine**

**3ra.** Analytical TLC on silica gel, 1:16 ethyl acetate/hexane  $R_f = 0.46$ ; colorless solid; mp >200 °C; yield 78% (84 mg);  $^1\text{H NMR}$  (400 MHz,  $\text{CDCl}_3$ )  $\delta$  10.03 (d,  $J = 9.42$  Hz, 1H), 8.80-8.72 (m, 1.71H), 8.33-8.01 (m, 14.53H), 7.40-7.38 (m, 3.66H), 7.18-7.09 (m, 7.24H), 7.06-6.98 (m, 4H), 5.16 (s, 0.81H), 4.43 (s, 1H), 3.90-3.87 (m, 1.02H), 3.81-3.78 (m, 0.86H), 3.58 (d,  $J = 13.6$  Hz, 0.89H), 3.47 (d,  $J = 13.2$  Hz, 1.03H), 3.06-2.89 (m, 5.79H), 2.63 (t,  $J = 10.8$  Hz, 0.92H), 2.57-2.36 (m, 11.52H), 2.29-2.24 (m, 120H), 1.78-1.65 (m, 4.72H);  $^{13}\text{C NMR}$  (100 MHz,  $\text{CDCl}_3$ )  $\delta$  137.67, 137.62, 137.4, 137.3, 137.2, 133.0, 132.9, 132.4, 132.36, 132.34, 131.9, 131.4, 131.36, 131.30, 130.6, 130.3, 130.28, 130.25, 130.0, 129.9, 129.24, 129.21, 129.1, 128.2, 128.1, 128.0, 127.99, 127.95, 127.8, 127.7, 127.6, 127.3, 126.7, 126.2, 126.1, 126.0, 125.728, 125.721, 125.6, 125.3, 125.2, 125.0, 124.9, 124.7, 124.6, 124.2, 122.3, 93.2, 82.5, 68.6, 68.1, 59.6, 59.4, 57.4, 56.2, 52.3, 52.0, 50.9, 50.2, 22.2, 22.0, 21.2; FT-IR (KBr) 2834, 1512, 1489, 1313, 1126, 1014  $\text{cm}^{-1}$ ; HRMS (ESI)  $m/z$   $[\text{M}+\text{H}]^+$  calcd for  $\text{C}_{36}\text{H}_{33}\text{ClN}_3$ : 542.2358, found: 542.2379.

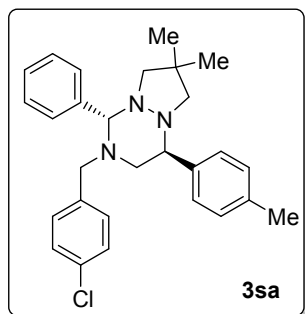

**2-(4-Chlorobenzyl)-7,7-dimethyl-1-phenyl-4-(*p*-tolyl)hexahydro-6H-pyrazolo[1,2-a][1,2,4]-**

**triazine 3sa.** Analytical TLC on silica gel, 1:24 ethyl acetate/hexane  $R_f = 0.52$ ; colorless solid; mp 139-140 °C; yield 92% (82 mg);  $^1\text{H NMR}$  (400 MHz,  $\text{CDCl}_3$ )  $\delta$  7.53-7.51 (m, 2H), 7.31-7.23 (m,

3H), 7.18 (d,  $J = 8.0$  Hz, 2H), 7.09-7.00 (m, 6H), 3.67 (s, 1H), 3.52-3.48 (m, 2H), 2.78-2.74 (m, 2H), 2.54 (d,  $J = 8.8$  Hz, 1H), 2.24-2.07 (m, 7H), 0.94 (s, 3H), 0.88 (s, 3H);  $^{13}\text{C}$  NMR (100 MHz,  $\text{CDCl}_3$ )  $\delta$  139.5, 137.5, 137.44, 137.40, 132.4, 130.1, 129.2, 129.1, 128.8, 128.5, 128.2, 127.8, 89.7, 67.9, 67.2, 66.2, 59.3, 56.6, 36.2, 29.1, 28.9, 21.2; FT-IR (KBr) 2959, 2823, 1642, 1514, 1490, 1450, 1130, 1015  $\text{cm}^{-1}$ ; HRMS (ESI)  $m/z$   $[\text{M}+\text{H}]^+$  calcd for  $\text{C}_{28}\text{H}_{33}\text{ClN}_3$ : 446.2358, found: 446.2360.

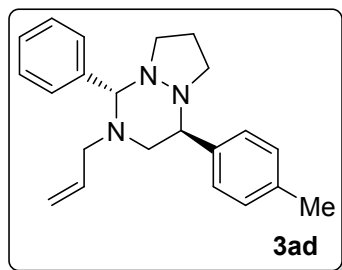

**2-Allyl-1-phenyl-4-(*p*-tolyl)hexahydro-6H-pyrazolo[1,2-a][1,2,4]triazine 3ad.** Analytical TLC on silica gel, 1:24 ethyl acetate/hexane  $R_f = 0.50$ ; colorless solid; mp 110-111  $^{\circ}\text{C}$ ; yield 92% (61 mg);  $^1\text{H}$  NMR (400 MHz,  $\text{CDCl}_3$ )  $\delta$  7.53-7.51 (m, 2H), 7.37-7.32 (m, 5H), 7.15 (d,  $J = 7.6$  Hz, 2H), 5.78-5.67 (m, 1H), 5.02-4.97 (m, 2H), 3.71 (s, 1H), 3.68-3.65 (m, 1H), 3.13-3.05 (m, 2H), 2.92-2.86 (m, 1H), 2.57-2.28 (m, 8H), 1.77-1.69 (m, 2H);  $^{13}\text{C}$  NMR (100 MHz,  $\text{CDCl}_3$ )  $\delta$  139.3, 137.5, 137.4, 135.1, 129.2, 129.1, 128.7, 128.4, 128.0, 117.5, 89.2, 68.1, 59.1, 56.1, 51.9, 50.7, 22.0, 21.2; FT-IR (KBr) 2828, 1641, 1512, 1128, 1021  $\text{cm}^{-1}$ ; HRMS (ESI)  $m/z$   $[\text{M}+\text{H}]^+$  calcd for  $\text{C}_{22}\text{H}_{28}\text{N}_3$ : 334.2278, found: 334.2287.

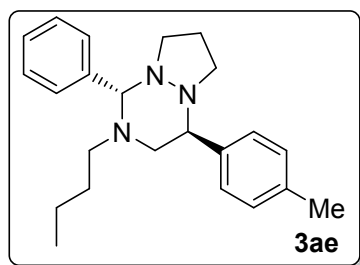

**2-Butyl-1-phenyl-4-(*p*-tolyl)hexahydro-6H-pyrazolo[1,2-a][1,2,4]triazine 3ae.** Analytical TLC on silica gel, 1:24 ethyl acetate/hexane  $R_f = 0.56$ ; thick liquid; yield 87% (61 mg);  $^1\text{H}$  NMR (400 MHz,  $\text{CDCl}_3$ )  $\delta$  7.44-7.43 (m, 2H), 7.28-7.25 (m, 5H), 7.09 (d,  $J = 7.6$  Hz, 2H), 3.61-3.58 (m, 2H), 3.10-3.06 (m, 1H), 2.84-2.79 (m, 1H), 2.40-2.36 (m, 1H), 2.35-2.29 (m, 2H), 2.27 (s, 3H), 2.26-2.21 (m, 2H), 1.90-1.83 (m, 1H), 1.69-1.61 (m, 2H), 1.28-1.19 (m, 2H), 1.13-1.05 (m, 1H),

1.03 – 0.92 (m, 1H), 0.64 (t,  $J = 7.6$  Hz, 3H);  $^{13}\text{C}$  NMR (100 MHz,  $\text{CDCl}_3$ )  $\delta$  139.7, 137.57, 137.54, 129.2, 129.1, 128.5, 128.3, 128.0, 89.8, 68.2, 59.1, 52.5, 52.0, 50.7, 28.7, 22.0, 21.3, 20.4, 14.0; FT-IR (neat) 2827, 1636, 1513, 1315, 1129, 1021  $\text{cm}^{-1}$ ; HRMS (ESI)  $m/z$   $[\text{M}+\text{H}]^+$  calcd for  $\text{C}_{23}\text{H}_{32}\text{N}_3$ : 350.2591, found: 350.2605.

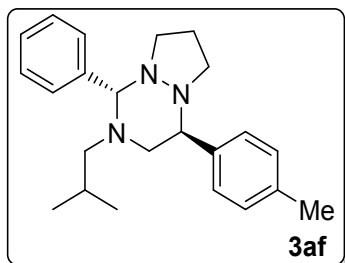

**2-Isobutyl-1-phenyl-4-(*p*-tolyl)hexahydro-6H-pyrazolo[1,2-a][1,2,4]triazine 3af.** Analytical TLC on silica gel, 1:24 ethyl acetate/hexane  $R_f = 0.52$ ; thick liquid; yield 89% (62 mg);  $^1\text{H}$  NMR (400 MHz,  $\text{CDCl}_3$ )  $\delta$  7.43 (s, 2H), 7.28-7.24 (m, 5H), 7.09 (d,  $J = 8.0$  Hz, 2H), 3.61-3.57 (m, 1H), 3.54 (s, 1H), 3.08-3.05 (m, 1H), 2.84-2.79 (m, 1H), 2.38-2.33 (m, 1H), 2.30-2.21 (m, 6H), 1.88-1.82 (m, 1H), 1.75-1.71 (m, 1H), 1.69-1.61 (m, 2H), 1.60-1.52 (m, 1H), 0.71 (d,  $J = 6.4$  Hz, 3H), 0.57 (d,  $J = 6.4$  Hz, 3H);  $^{13}\text{C}$  NMR (100 MHz,  $\text{CDCl}_3$ )  $\delta$  139.8, 137.58, 137.55, 129.5, 129.1, 128.5, 128.2, 128.0, 90.3, 68.2, 60.9, 59.7, 51.9, 50.8, 25.7, 21.9, 21.29, 21.20, 20.3; FT-IR (neat) 2954, 2826, 1638, 1514, 1451, 1127, 1022  $\text{cm}^{-1}$ ; HRMS (ESI)  $m/z$   $[\text{M}+\text{H}]^+$  calcd for  $\text{C}_{23}\text{H}_{32}\text{N}_3$ : 350.2591, found: 350.2608.

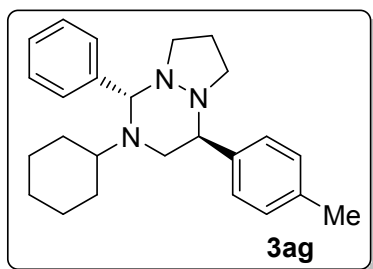

**2-Cyclohexyl-1-phenyl-4-(*p*-tolyl)hexahydro-6H-pyrazolo[1,2-a][1,2,4]triazine 3ag.** Analytical TLC on silica gel, 1:24 ethyl acetate/hexane  $R_f = 0.54$ ; thick liquid; yield 76% (57 mg);  $^1\text{H}$  NMR (600 MHz,  $\text{CDCl}_3$ )  $\delta$  7.51-7.49 (m, 2H), 7.35-7.33 (m, 5H), 7.16 (d,  $J = 7.6$  Hz, 2H), 4.05 (s, 1H), 3.62 (d,  $J = 10.4$  Hz, 1H), 3.01-2.98 (m, 1H), 2.90-2.85 (m, 1H), 2.71 (t,  $J = 10.8$  Hz, 1H), 2.43-2.38 (m, 1H), 2.34-2.33 (m, 3H), 2.31-2.21 (m, 2H), 1.76-1.53 (m, 8H), 1.44-1.39 (m, 1H), 1.36-1.29 (m, 1H), 1.25-1.14 (m, 1H), 1.01-0.88 (m, 1H), 0.86-0.73 (m, 1H);  $^{13}\text{C}$  NMR (100

MHz, CDCl<sub>3</sub>) δ 139.5, 137.9, 137.4, 129.1, 129.0, 128.5, 128.4, 128.0, 87.0, 68.6, 57.3, 52.5, 51.9, 50.8, 31.9, 26.6, 26.4, 25.9, 24.9, 22.0, 21.2; FT-IR (neat) 2928, 2852, 2826, 1514, 1450, 1125, 1020 cm<sup>-1</sup>; HRMS (ESI) *m/z* [M+H]<sup>+</sup> calcd for C<sub>25</sub>H<sub>34</sub>N<sub>3</sub>: 376.2747, found: 376.2746.

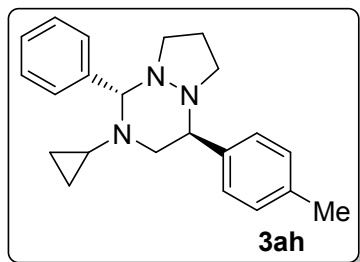

**2-Cyclopropyl-1-phenyl-4-(*p*-tolyl)hexahydro-6H-pyrazolo[1,2-*a*][1,2,4]triazine 3ah.**

Analytical TLC on silica gel, 1:24 ethyl acetate/hexane *R<sub>f</sub>* = 0.52; thick liquid; yield 73% (49 mg); <sup>1</sup>H NMR (400 MHz, CDCl<sub>3</sub>) δ 7.49-7.47 (m, 2H), 7.34-7.30 (m, 5H), 7.16 (d, *J* = 8.0 Hz, 2H), 3.83 (s, 1H), 3.65-3.62 (m, 1H), 3.15-3.12 (m, 1H), 2.93-2.88 (m, 1H), 2.70-2.60 (m, 2H), 2.34 (s, 3H), 2.32-2.23 (m, 2H), 1.78-1.71 (m, 2H), 1.61-1.56 (m, 1H), 0.23-0.12 (m, 2H), -0.05- -0.12 (m, 1H), -0.22--0.28 (m, 1H); <sup>13</sup>C NMR (100 MHz, CDCl<sub>3</sub>) δ 139.5, 137.5, 137.3, 129.6, 129.2, 128.3, 127.9, 127.8, 90.6, 67.8, 61.2, 51.9, 50.5, 35.0, 22.1, 21.2, 8.8, 4.8; FT-IR (neat) 2827, 1633, 1513, 1315, 1133, 1021 cm<sup>-1</sup>; HRMS (ESI) *m/z* [M+H]<sup>+</sup> calcd for C<sub>22</sub>H<sub>28</sub>N<sub>3</sub>: 334.2278, found: 334.2280.

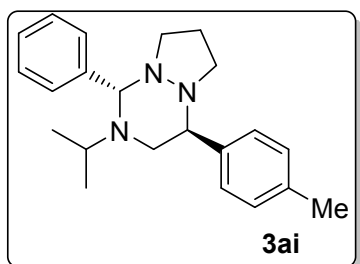

**2-Isopropyl-1-phenyl-4-(*p*-tolyl)hexahydro-6H-pyrazolo[1,2-*a*][1,2,4]triazine 3ai.** Analytical TLC on silica gel, 1:24 ethyl acetate/hexane *R<sub>f</sub>* = 0.54; colorless solid; mp 130-131 °C; yield 79% (53 mg); <sup>1</sup>H NMR (400 MHz, CDCl<sub>3</sub>) δ 7.44 (s, 2H), 7.29-7.27 (m, 5H), 7.10 (d, *J* = 7.6 Hz, 2H), 3.87 (s, 1H), 3.57-3.54 (m, 1H), 2.89-2.85 (m, 1H), 2.84-2.79 (m, 1H), 2.70-2.63 (m, 1H), 2.55 (t, *J* = 10.8 Hz, 1H), 2.36-2.31 (m, 1H), 2.30-2.20 (m, 5H), 1.67-1.62 (m, 2H), 0.90 (d, *J* = 6.8 Hz, 3H), 0.76 (d, *J* = 6.4 Hz, 3H); <sup>13</sup>C NMR (100 MHz, CDCl<sub>3</sub>) δ 139.5, 137.8, 137.5, 129.18, 129.12, 128.6, 128.5, 128.0, 87.4, 68.5, 51.9, 50.8, 50.4, 47.7, 22.0, 21.7, 21.2, 13.2; FT-IR (KBr) 2966,



2822, 1629, 1511, 1361, 1309, 1127, 1009  $\text{cm}^{-1}$ ; HRMS (ESI)  $m/z$   $[\text{M}+\text{H}]^+$  calcd for  $\text{C}_{22}\text{H}_{30}\text{N}_3$ : 336.2434, found: 336.2445.

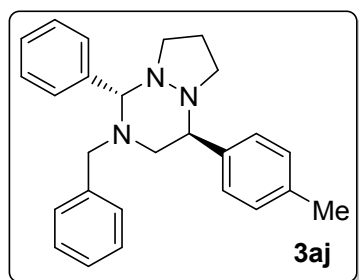

**2-Benzyl-1-phenyl-4-(*p*-tolyl)hexahydro-6H-pyrazolo[1,2-a][1,2,4]triazine 3aj.** Analytical TLC on silica gel, 1:24 ethyl acetate/hexane  $R_f = 0.50$ ; colorless solid; mp 147-148  $^{\circ}\text{C}$ ; yield 91% (70 mg);  $^1\text{H}$  NMR (400 MHz,  $\text{CDCl}_3$ )  $\delta$  7.58 – 7.56 (m, 2H), 7.32-7.23 (m, 3H), 7.20-7.10 (m, 6H), 7.08-7.04 (m, 1H), 7.02 (d,  $J = 7.6$  Hz, 2H), 3.73 (s, 1H), 3.62 (d,  $J = 13.2$  Hz, 1H), 3.56-3.52 (m, 1H), 2.87-2.77 (m, 3H), 2.46-2.40 (m, 1H), 2.38-2.31 (m, 1H), 2.30 – 2.25 (m, 2H), 2.22 (s, 3H), 1.71-1.63 (m, 2H);  $^{13}\text{C}$  NMR (100 MHz,  $\text{CDCl}_3$ )  $\delta$  139.6, 139.0, 137.5, 137.2, 129.2, 129.1, 128.8, 128.7, 128.5, 128.2, 128.0, 126.8, 89.8, 68.1, 59.0, 57.3, 51.9, 50.8, 22.0, 21.2; FT-IR (KBr) 2826, 1631, 1491, 1314, 1126, 1066  $\text{cm}^{-1}$ ; HRMS (ESI)  $m/z$   $[\text{M}+\text{H}]^+$  calcd for  $\text{C}_{26}\text{H}_{30}\text{N}_3$ : 384.2434, found: 384.2439.

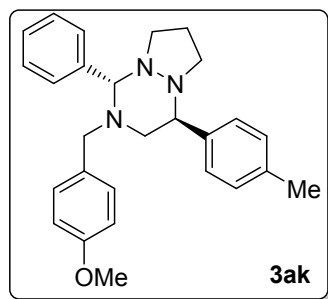

**2-(4-Methoxybenzyl)-1-phenyl-4-(*p*-tolyl)hexahydro-6H-pyrazolo[1,2-a][1,2,4]triazine 3ak.** Analytical TLC on silica gel, 1:16 ethyl acetate/hexane  $R_f = 0.46$ ; colorless solid; mp 153-154  $^{\circ}\text{C}$ ; yield 93% (77 mg);  $^1\text{H}$  NMR (400 MHz,  $\text{CDCl}_3$ )  $\delta$  7.56 (s, 2H), 7.32-7.23 (m, 3H), 7.20-7.17 (m, 2H), 7.02 (t,  $J = 8.4$  Hz, 4H), 6.68 – 6.65 (m, 2H), 3.70 (s, 1H), 3.65 (s, 3H), 3.55-3.51 (m, 2H), 2.86-2.82 (m, 1H), 2.80-2.74 (m, 2H), 2.45-2.39 (m, 1H), 2.37-2.30 (m, 1H), 2.29-2.21 (m, 5H), 1.70-1.63 (m, 2H);  $^{13}\text{C}$  NMR (100 MHz,  $\text{CDCl}_3$ )  $\delta$  158.5, 139.7, 137.4, 137.3, 130.9, 129.9, 129.2, 129.1, 128.7, 128.5, 128.0, 113.5, 89.8, 68.1, 58.9, 56.7, 55.3, 51.9, 50.8, 22.0, 21.2; FT-IR (KBr)

2824, 1611, 1512, 1251, 1125, 1035  $\text{cm}^{-1}$ ; HRMS (ESI)  $m/z$   $[\text{M}+\text{H}]^+$  calcd for  $\text{C}_{27}\text{H}_{32}\text{N}_3\text{O}$ : 414.2540, found: 414.2549.

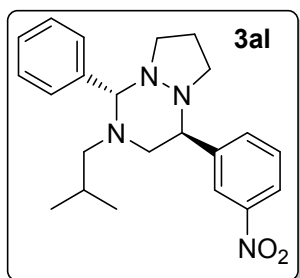

**2-Isobutyl-4-(3-nitrophenyl)-1-phenylhexahydro-6H-pyrazolo[1,2-a][1,2,4]triazine 3al.**

Analytical TLC on silica gel, 1:24 ethyl acetate/hexane  $R_f$  = 0.48; thick liquid; yield 92% (70 mg);  $^1\text{H}$  NMR (400 MHz,  $\text{CDCl}_3$ )  $\delta$  8.34-8.33 (m, 1H), 8.16-8.13 (m, 1H), 7.80 (d,  $J$  = 7.6 Hz, 1H), 7.53-7.49 (m, 3H), 7.35-7.32 (m, 3H), 3.82-3.78 (m, 1H), 3.63 (s, 1H), 3.16-3.13 (m, 1H), 2.88-2.83 (m, 1H), 2.46-2.41 (m, 1H), 2.39-2.24 (m, 3H), 1.97-1.91 (m, 1H), 1.83-1.70 (m, 3H), 1.67-1.57 (m, 1H), 0.78 (d,  $J$  = 6.4 Hz, 3H), 0.64 (d,  $J$  = 6.8 Hz, 3H);  $^{13}\text{C}$  NMR (100 MHz,  $\text{CDCl}_3$ )  $\delta$  148.5, 142.8, 139.4, 134.3, 129.4, 128.7, 128.3, 123.0, 122.9, 90.0, 67.7, 60.7, 59.6, 51.9, 50.7, 25.7, 21.9, 21.1, 20.3; FT-IR (neat) 2958, 2832, 1628, 1530, 1352, 1127, 1024  $\text{cm}^{-1}$ ; HRMS (ESI)  $m/z$   $[\text{M}+\text{H}]^+$  calcd for  $\text{C}_{22}\text{H}_{29}\text{N}_4\text{O}_2$ : 381.2285, found: 381.2286.

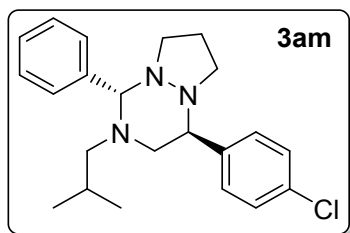

**4-(4-Chlorophenyl)-2-isobutyl-1-phenylhexahydro-6H-pyrazolo[1,2-a][1,2,4]triazine 3am.**

Analytical TLC on silica gel, 1:24 ethyl acetate/hexane  $R_f$  = 0.54; thick liquid; yield 89% (66 mg);  $^1\text{H}$  NMR (400 MHz,  $\text{CDCl}_3$ )  $\delta$  7.49-7.48 (m, 2H), 7.40-7.37 (m, 2H), 7.34-7.26 (m, 5H), 3.68-3.65 (m, 1H), 3.60 (s, 1H), 3.13-3.09 (m, 1H), 2.88-2.83 (m, 1H), 2.45-2.22 (m, 4H), 1.95-1.90 (m, 1H), 1.82-1.78 (m, 1H), 1.76-1.68 (m, 2H), 1.67-1.57 (m, 1H), 0.77 (d,  $J$  = 6.4 Hz, 3H), 0.64 (d,  $J$  = 6.8 Hz, 3H);  $^{13}\text{C}$  NMR (100 MHz,  $\text{CDCl}_3$ )  $\delta$  139.6, 139.0, 133.4, 129.4, 128.68, 128.61, 128.2, 90.2, 67.8, 60.8, 59.6, 51.9, 50.7, 25.7, 21.9, 21.1, 20.3; FT-IR (neat) 2956, 2829, 1491, 1292, 1127, 1090, 1015  $\text{cm}^{-1}$ ; HRMS (ESI)  $m/z$   $[\text{M}+\text{H}]^+$  calcd for  $\text{C}_{22}\text{H}_{29}\text{ClN}_3$ : 370.2045, found: 370.2057.

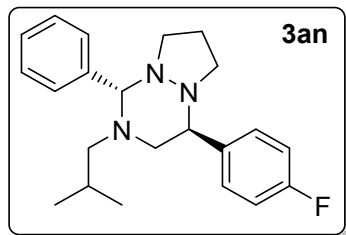

**4-(4-Fluorophenyl)-2-isobutyl-1-phenylhexahydro-6H-pyrazolo[1,2-a][1,2,4]triazine 3an.**

Analytical TLC on silica gel, 1:24 ethyl acetate/hexane  $R_f = 0.52$ ; thick liquid; yield 94% (66 mg);  $^1\text{H NMR}$  (400 MHz,  $\text{CDCl}_3$ )  $\delta$  7.49 (s, 2H), 7.44-7.40 (m, 2H), 7.34-7.31 (m, 3H), 7.01 (t,  $J = 8.8$  Hz, 2H), 3.69-3.65 (m, 1H), 3.60 (s, 1H), 3.14-3.10 (m, 1H), 2.87-2.81 (m, 1H), 2.45-2.24 (m, 4H), 1.96-1.90 (m, 1H), 1.82-1.78 (m, 1H), 1.75-1.58 (m, 3H), 0.78 (d,  $J = 6.4$  Hz, 3H), 0.65 (d,  $J = 6.4$  Hz, 3H);  $^{13}\text{C NMR}$  (100 MHz,  $\text{CDCl}_3$ )  $\delta$  163.6 ( $J_{\text{C-F}} = 244.2$  Hz), 139.7, 136.3 ( $J_{\text{C-F}} = 3.1$  Hz), 129.6 ( $J_{\text{C-F}} = 7.8$  Hz), 129.5, 128.5, 128.2, 115.4 ( $J_{\text{C-F}} = 21.0$  Hz), 90.3, 67.7, 60.9, 59.7, 51.9, 50.8, 25.7, 21.9, 21.1, 20.3;  $^{19}\text{F NMR}$  (377 MHz,  $\text{CDCl}_3$ )  $\delta$  -114.7; FT-IR (neat) 2957, 2827, 1607, 1510, 1223, 1127, 1105  $\text{cm}^{-1}$ ; HRMS (ESI)  $m/z$   $[\text{M}+\text{H}]^+$  calcd for  $\text{C}_{22}\text{H}_{29}\text{FN}_3$ : 354.2340, found: 354.2348.

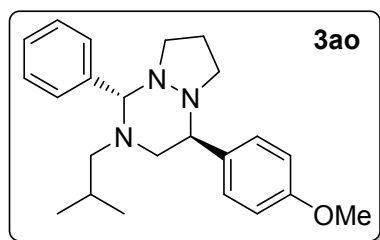

**2-Isobutyl-4-(4-methoxyphenyl)-1-phenylhexahydro-6H-pyrazolo[1,2-a][1,2,4]triazine 3ao.**

Analytical TLC on silica gel, 1:16 ethyl acetate/hexane  $R_f = 0.48$ ; thick liquid; yield 87% (63 mg);  $^1\text{H NMR}$  (400 MHz,  $\text{CDCl}_3$ )  $\delta$  7.49 (s, 2H), 7.39-7.30 (m, 5H), 6.89-6.85 (m, 2H), 3.80 (s, 3H), 3.66-3.62 (m, 1H), 3.61 (s, 1H), 3.15-3.11 (m, 1H), 2.88-2.83 (m, 1H), 2.45-2.39 (m, 1H), 2.37-2.27 (m, 3H), 1.95-1.89 (m, 1H), 1.82-1.78 (m, 1H), 1.75-1.68 (m, 2H), 1.66-1.59 (m, 1H), 0.78 (d,  $J = 6.8$  Hz, 3H), 0.64 (d,  $J = 6.8$  Hz, 3H);  $^{13}\text{C NMR}$  (100 MHz,  $\text{CDCl}_3$ )  $\delta$  159.2, 139.8, 132.7, 129.5, 129.1, 128.5, 128.2, 113.8, 90.3, 67.8, 60.9, 59.6, 55.3, 51.9, 50.8, 25.7, 21.9, 21.1, 20.3; FT-IR (neat) 2955, 2830, 1611, 1513, 1248, 1172, 1128, 1036  $\text{cm}^{-1}$ ; HRMS (ESI)  $m/z$   $[\text{M}+\text{H}]^+$  calcd for  $\text{C}_{23}\text{H}_{32}\text{N}_3\text{O}$ : 366.2540, found: 366.2542.

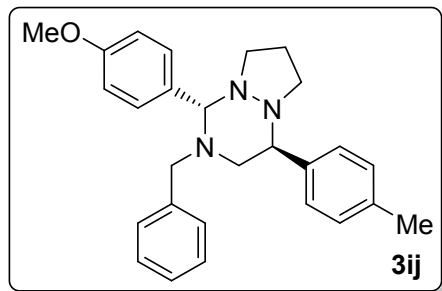

**2-Benzyl-1-(4-methoxyphenyl)-4-(*p*-tolyl)hexahydro-6H-pyrazolo[1,2-a][1,2,4]triazine 3ij.**

Analytical TLC on silica gel, 1:16 ethyl acetate/hexane  $R_f = 0.44$ ; colorless solid; mp 160-161 °C; yield 92% (76 mg);  $^1\text{H NMR}$  (400 MHz,  $\text{CDCl}_3$ )  $\delta$  7.49-7.47 (m, 2H), 7.19-7.17 (m, 2H), 7.15-7.10 (m, 4H), 7.08-7.03 (m, 1H), 7.02 (d,  $J = 7.6$  Hz, 2H), 6.84-6.82 (m, 2H), 3.73 (s, 3H), 3.68-3.61 (m, 2H), 3.54-3.51 (m, 1H), 2.86-2.77 (m, 3H), 2.48-2.43 (m, 1H), 2.36-2.22 (m, 6H), 1.70-1.63 (m, 2H);  $^{13}\text{C NMR}$  (100 MHz,  $\text{CDCl}_3$ )  $\delta$  159.9, 139.1, 137.4, 137.3, 131.8, 130.2, 129.1, 128.7, 128.1, 128.0, 126.8, 113.9, 89.2, 68.1, 59.1, 57.3, 55.3, 52.0, 50.8, 22.0, 21.2; FT-IR (KBr) 2831, 1610, 1585, 1512, 1300, 1248, 1128, 1037  $\text{cm}^{-1}$ ; HRMS (ESI)  $m/z$   $[\text{M}+\text{H}]^+$  calcd for  $\text{C}_{27}\text{H}_{32}\text{N}_3\text{O}$ : 414.2540, found: 414.2541.

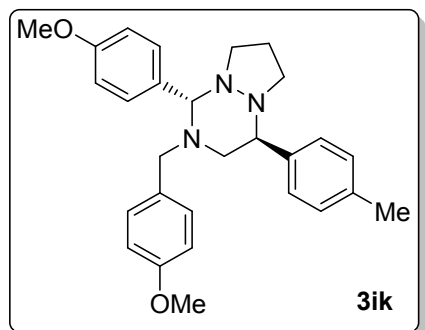

**2-(4-Methoxybenzyl)-1-(4-methoxyphenyl)-4-(*p*-tolyl)hexahydro-6H-pyrazolo[1,2-a][1,2,4]-**

**triazine 3ik.** Analytical TLC on silica gel, 1:16 ethyl acetate/hexane  $R_f = 0.42$ ; colorless solid; mp 161-162 °C; yield 89% (79 mg);  $^1\text{H NMR}$  (400 MHz,  $\text{CDCl}_3$ )  $\delta$  7.48-7.46 (m, 2H), 7.19-7.17 (m, 2H), 7.04-7.00 (m, 4H), 6.85-6.82 (m, 2H), 6.68-6.65 (m, 2H), 3.74 (s, 3H), 3.65 (s, 4H), 3.57-3.49 (m, 2H), 2.85-2.73 (m, 3H), 2.47-2.42 (m, 1H), 2.35-2.21 (m, 6H), 1.70-1.62 (m, 2H);  $^{13}\text{C NMR}$  (100 MHz,  $\text{CDCl}_3$ )  $\delta$  159.9, 158.5, 137.45, 137.40, 131.9, 131.1, 130.2, 129.9, 129.0, 128.0, 113.8, 113.6, 89.2, 68.1, 59.0, 56.6, 55.38, 55.33, 52.0, 50.8, 22.0, 21.2; FT-IR (KBr) 2953, 2831, 1510,

1585, 1510, 1300, 1245, 1127, 1036  $\text{cm}^{-1}$ ; HRMS (ESI)  $m/z$   $[M+H]^+$  calcd for  $\text{C}_{28}\text{H}_{34}\text{N}_3\text{O}_2$ : 444.2646, found: 444.2650.

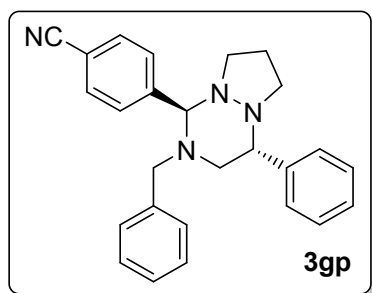

**4-((1R,4R)-2-Benzyl-4-phenylhexahydro-6H-pyrazolo[1,2-a][1,2,4]triazin-1-yl)benzotrile**

**3gp.** Analytical TLC on silica gel, 1:16 ethyl acetate/hexane  $R_f = 0.52$ ; colorless solid; mp  $>200$   $^{\circ}\text{C}$ ; yield 79% (62 mg);  $^1\text{H}$  NMR (400 MHz,  $\text{CDCl}_3$ )  $\delta$  7.73-7.71 (m, 2H), 7.63 (d,  $J = 8.8$  Hz, 2H), 7.30-7.28 (m, 2H), 7.23-7.07 (m, 8H), 3.79 (s, 1H), 3.57-3.53 (m, 1H), 3.48 (d,  $J = 13.2$  Hz, 1H), 2.89-2.85 (m, 2H), 2.83-2.77 (m, 1H), 2.40-2.20 (m, 4H), 1.73-1.65 (m, 2H);  $^{13}\text{C}$  NMR (100 MHz,  $\text{CDCl}_3$ )  $\delta$  145.2, 139.9, 138.2, 132.4, 130.1, 128.56, 128.50, 128.3, 128.1, 127.9, 127.1, 118.7, 112.7, 89.0, 68.2, 58.8, 57.4, 51.8, 50.7, 22.0; FT-IR (KBr) 2830, 2227, 1607, 1494, 1452, 1301, 1128, 1027  $\text{cm}^{-1}$ ; HRMS (ESI)  $m/z$   $[M+H]^+$  calcd for  $\text{C}_{26}\text{H}_{27}\text{N}_4$ : 395.2230, found: 395.2234;  $[\alpha]_D^{20.8} = -24.00$  ( $c = 0.02$ ,  $\text{CHCl}_3$ ); HPLC:  $>97\%$  ee [CHIRALCEL AD, hexane/ $i$ PrOH = 98:2, flow rate: 1 mL /min,  $\lambda = 254$  nm,  $t_R = 8.52$  min (minor), 12.66 min (major)].

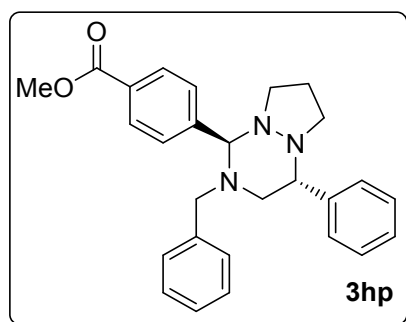

**Methyl 4-((1R,4R)-2-benzyl-4-phenylhexahydro-6H-pyrazolo[1,2-a][1,2,4]triazin-1-yl)benzoate**

**3hp.** Analytical TLC on silica gel, 1:16 ethyl acetate/hexane  $R_f = 0.48$ ; colorless solid; mp 182-183  $^{\circ}\text{C}$ ; yield 85% (72 mg);  $^1\text{H}$  NMR (400 MHz,  $\text{CDCl}_3$ )  $\delta$  8.10 (d,  $J = 8.8$  Hz, 2H), 7.78-7.76 (m, 2H), 7.41-7.38 (m, 2H), 7.33-7.15 (m, 8H), 3.94 (s, 3H), 3.89 (s, 1H), 3.68-3.60 (m, 2H), 2.99-2.87 (m, 3H), 2.53-2.32 (m, 4H), 1.82-1.74 (m, 2H);  $^{13}\text{C}$  NMR (100 MHz,  $\text{CDCl}_3$ )  $\delta$  167.0, 144.8,

140.1, 138.5, 130.7, 129.9, 129.3, 128.6, 128.4, 128.2, 128.1, 127.9, 127.0, 89.2, 68.3, 58.9, 57.3, 52.2, 51.9, 50.7, 22.0; FT-IR (KBr) 2831, 1724, 1636, 1276, 1127, 1018  $\text{cm}^{-1}$ ; HRMS (ESI)  $m/z$   $[M+H]^+$  calcd for  $\text{C}_{27}\text{H}_{30}\text{N}_3\text{O}_2$ : 428.2333, found: 428.2334;  $[\alpha]_{\text{D}}^{21.5} = -70.00$  ( $c = 0.02$ ,  $\text{CHCl}_3$ ); HPLC: >99% *ee* [CHIRALCEL AD, hexane/*i*PrOH = 98:2, flow rate: 1 mL /min,  $\lambda = 254$  nm,  $t_R = 7.96$  min (minor), 11.62 min (major)].

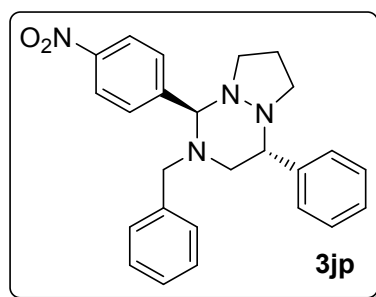

**(1R,4R)-2-Benzyl-1-(4-nitrophenyl)-4-phenylhexahydro-6H-pyrazolo[1,2-a][1,2,4]triazine**

**3jp**. Analytical TLC on silica gel, 1:16 ethyl acetate/hexane  $R_f = 0.46$ ; yellow solid; mp 193-194  $^{\circ}\text{C}$ ; yield 81% (67 mg);  $^1\text{H}$  NMR (400 MHz,  $\text{CDCl}_3$ )  $\delta$  8.19-8.17 (m, 2H), 7.79-7.77 (m, 2H), 7.30-7.28 (m, 2H), 7.23-7.06 (m, 8H), 3.85 (s, 1H), 3.58-3.55 (m, 1H), 3.48 (d,  $J = 13.2$  Hz, 1H), 2.90-2.87 (m, 2H), 2.83-2.78 (m, 1H), 2.40-2.20 (m, 4H), 1.74-1.65 (m, 2H);  $^{13}\text{C}$  NMR (100 MHz,  $\text{CDCl}_3$ )  $\delta$  148.4, 147.1, 139.8, 138.1, 130.2, 128.56, 128.51, 128.3, 128.1, 128.0, 127.1, 123.8, 88.6, 68.2, 58.8, 57.4, 51.8, 50.7, 22.0; FT-IR (KBr) 2830, 1606, 1522, 1493, 1346, 1314, 1128, 1026  $\text{cm}^{-1}$ ; HRMS (ESI)  $m/z$   $[M+H]^+$  calcd for  $\text{C}_{25}\text{H}_{27}\text{N}_4\text{O}_2$ : 415.2129, found: 415.2129;  $[\alpha]_{\text{D}}^{21.4} = -25.00$  ( $c = 0.02$ ,  $\text{CHCl}_3$ ); HPLC: >99% *ee* [CHIRALCEL AD, hexane/*i*PrOH = 98:2, flow rate: 1 mL /min,  $\lambda = 254$  nm,  $t_R = 6.76$  min (minor), 8.51 min (major)].

**Intermolecular Competitive Experiment Using 1i and 1j.** 1-(4-Chlorobenzyl)-2-(*p*-tolyl)aziridine **2a** (52 mg, 0.2 mmol), **1i** (38 mg, 0.2 mmol), **1j** (42 mg, 0.2 mmol) and  $\text{FeCl}_3$  (3 mg, 0.02 mmol) were stirred in dichloromethane (2.0 mL) at room temperature (25  $^{\circ}\text{C}$ ) for 1 minute. Next, the reaction mixture was diluted with dichloromethane (5 mL) and passed through a short pad of celite using dichloromethane (10 mL) as solvent. Evaporation of the solvent gave a residue that was purified on silica gel column chromatography using ethyl acetate and hexane as eluent to give **3ia** and **3ja** in 50 and 42% yields, respectively.

**Intermolecular Competitive Experiment Using 2n and 2o.** 6-Phenyl-1,5-diazabicyclo[3.1.0]-hexane **1a** (32 mg, 0.2 mmol), **2n** (38 mg, 0.2 mmol), **2o** (42 mg, 0.2 mmol) and FeCl<sub>3</sub> (3 mg, 0.02 mmol) were stirred in dichloromethane (2.0 mL) at room temperature (25 °C) for 1 minute. Next, the reaction mixture was diluted with dichloromethane (5 mL) and passed through a short pad of celite using dichloromethane (10 mL) as solvent. Evaporation of the solvent gave a residue that was purified on silica gel column chromatography using ethyl acetate and hexane as eluent to give **3an** and **3ao** in 47 and 42% yields, respectively.

**Epimerization Reaction of 3aa.**<sup>6</sup> Acetic acid (6 μL, 0.1 mmol) was added to a stirring solution of **3aa** (42 mg, 0.1 mmol) in dichloromethane (2 mL) and the reaction mixture was stirred at room temperature (25 °C) for 6 h. Next, the reaction mixture was quenched by using saturated aq. NaHCO<sub>3</sub> solution (10 mL) and extracted with CH<sub>2</sub>Cl<sub>2</sub> (3×10 mL). Drying (Na<sub>2</sub>SO<sub>4</sub>) and evaporation of the solvent gave a residue that was purified on silica gel column chromatography using ethyl acetate and hexane as an eluent to give **3aa** as a sole product in 96% yield (40 mg).

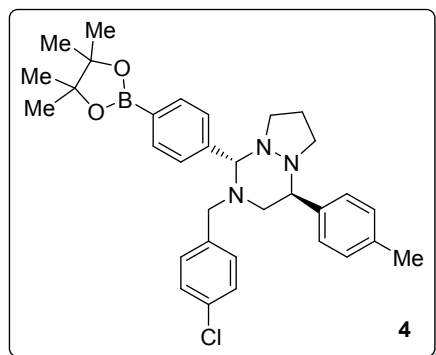

**2-(4-Chlorobenzyl)-1-(4-(4,4,5,5-tetramethyl-1,3,2-dioxaborolan-2-yl)phenyl)-4-(p-tolyl)hexahydro-6H-pyrazolo[1,2-a][1,2,4]triazine 4.**<sup>7</sup> The cyclo-adduct **3fa** (100 mg, 0.2 mmol), bis(pinacolato)diboron (50 mg, 0.2 mmol), KOAc (40 mg, 0.4 mmol), Pd(dppf)Cl<sub>2</sub>•CH<sub>2</sub>Cl<sub>2</sub> (8 mg, 0.01 mmol) and dry THF (3 mL) were heated to reflux at 100 °C for 4 h under nitrogen atmosphere. After completion, the reaction mixture was cooled to room temperature and passed through a short pad of celite with CH<sub>2</sub>Cl<sub>2</sub> (15 ml). Evaporation of the solvent gave a residue that was purified on silica gel column chromatography using hexane and ethyl acetate as an eluent to give **4**. Analytical TLC on silica gel, 1:16 ethyl acetate/hexane R<sub>f</sub> = 0.48; colorless solid; mp 194-195 °C; yield 75% (81 mg); <sup>1</sup>H NMR (400 MHz, CDCl<sub>3</sub>) δ 7.77 (d, J = 7.6 Hz, 2H), 7.56 (s, 2H), 7.19-7.17 (m, 2H),

7.09-7.01 (m, 6H), 3.72 (s, 1H), 3.54-3.47 (m, 2H), 2.83-2.76 (m, 3H), 2.45-2.39 (m, 1H), 2.35-2.22 (m, 6H), 1.70-1.63 (m, 2H), 1.27 (s, 12H);  $^{13}\text{C}$  NMR (100 MHz,  $\text{CDCl}_3$ )  $\delta$  142.5, 137.6, 137.4, 137.1, 135.1, 132.5, 130.1, 129.1, 128.6, 128.3, 128.0, 89.7, 84.0, 68.1, 59.1, 56.6, 51.9, 50.7, 25.05, 25.02, 22.0, 21.2; FT-IR (KBr) 2977, 2827, 1612, 1489, 1360, 1143, 1016  $\text{cm}^{-1}$ ; HRMS (ESI)  $m/z$   $[\text{M}+\text{H}]^+$  calcd for  $\text{C}_{32}\text{H}_{40}\text{BClN}_3\text{O}_2$ : 544.2897, found: 544.2893.

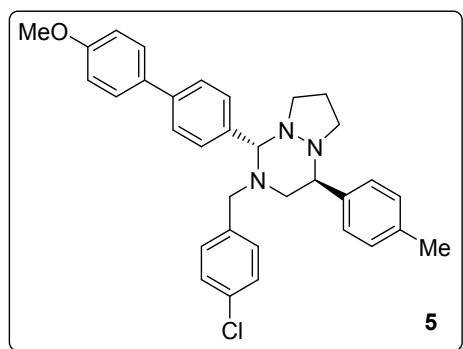

**2-(4-Chlorobenzyl)-1-(4'-methoxy-[1,1'-biphenyl]-4-yl)-4-(*p*-tolyl)hexahydro-6H-pyrazolo-[1,2-a][1,2,4]triazine **5**.**<sup>7</sup> The coupled adduct **4** (54 mg, 0.1 mmol), 4-bromoanisole (19 mg, 0.1 mmol),  $\text{Pd}(\text{PPh}_3)_4$  (2.3 mg, 0.002),  $\text{Na}_2\text{CO}_3$  (22 mg, 0.2 mmol),  $\text{H}_2\text{O}$  (50  $\mu\text{L}$ ) and toluene:EtOH (1:1, 2 mL) were heated to reflux at 100  $^\circ\text{C}$  for 3 h under nitrogen atmosphere. After completion, the reaction mixture was cooled to room temperature and passed through a short pad of celite with  $\text{CH}_2\text{Cl}_2$  (10 ml). Evaporation of the solvent gave a residue that was purified on silica gel column chromatography using hexane and ethyl acetate as an eluent to give **5**. Analytical TLC on silica gel, 1:12 ethyl acetate/hexane  $R_f$  = 0.46; colorless solid; mp 173-174  $^\circ\text{C}$ ; yield 82% (43 mg);  $^1\text{H}$  NMR (400 MHz,  $\text{CDCl}_3$ )  $\delta$  7.65 (s, 2H), 7.55 (t,  $J$  = 8.4 Hz, 4H), 7.28-7.26 (m, 2H), 7.17 (s, 4H), 7.12 (d,  $J$  = 8.0 Hz, 2H), 6.99-6.96 (m, 2H), 3.85-3.83 (m, 4H), 3.70 (d,  $J$  = 13.6 Hz, 1H), 3.63-3.60 (m, 1H), 2.93-2.87 (m, 3H), 2.61-2.56 (m, 1H), 2.48-2.41 (m, 1H), 2.38-2.31 (m, 5H), 1.80-1.73 (m, 2H);  $^{13}\text{C}$  NMR (100 MHz,  $\text{CDCl}_3$ )  $\delta$  159.3, 141.3, 137.8, 137.6, 137.1, 133.3, 132.5, 130.0, 129.5, 129.1, 128.3, 128.2, 128.0, 126.8, 114.3, 89.4, 68.1, 59.1, 56.7, 55.4, 52.0, 50.9, 22.0, 21.2; FT-IR (KBr) 3831, 1610, 1496, 1248, 1180, 1128, 1015  $\text{cm}^{-1}$ ; HRMS (ESI)  $m/z$   $[\text{M}+\text{H}]^+$  calcd for  $\text{C}_{33}\text{H}_{35}\text{ClN}_3\text{O}$ : 524.2463, found: 524.2463.



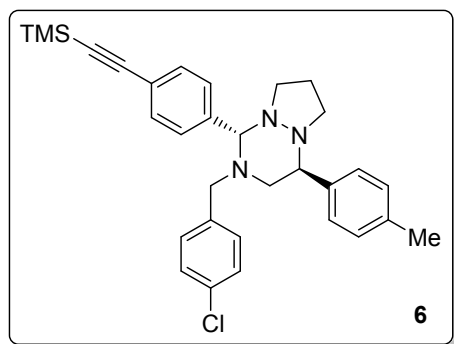

**2-(4-Chlorobenzyl)-4-(*p*-tolyl)-1-(4-((trimethylsilyl)ethynyl)phenyl)hexahydro-6H-pyrazolo[1,2-a][1,2,4]triazine **6**.**<sup>7</sup> The cyclo-adduct **3fa** (50 mg, 0.1 mmol), trimethylsilylacetylene (12 mg, 0.12 mmol), CuI (2 mg, 0.01 mmol), Pd(PPh<sub>3</sub>)<sub>4</sub> (6 mg, 0.005) and dry THF/Et<sub>3</sub>N (1:1, 2 mL) were heated to reflux at 100 °C for 12 h under nitrogen atmosphere. After completion, the reaction mixture was cooled to room temperature and passed through a short pad of celite with CH<sub>2</sub>Cl<sub>2</sub> (10 ml). Evaporation of the solvent gave a residue that was purified on silica gel column chromatography using hexane and ethyl acetate as an eluent to give **5**. Analytical TLC on silica gel, 1:24 ethyl acetate/hexane R<sub>f</sub> = 0.46; thick liquid; yield 71% (36 mg); <sup>1</sup>H NMR (400 MHz, CDCl<sub>3</sub>) δ 7.61-7.56 (m, 2H), 7.50-7.48 (m, 2H), 7.26-7.23 (m, 2H), 7.17-7.15 (m, 2H), 7.11-7.08 (m, 4H), 3.76 (s, 1H), 3.58-3.52 (m, 2H), 2.89-2.83 (m, 3H), 2.50-2.45 (m, 1H), 2.40-2.27 (m, 6H), 1.78-1.70 (m, 2H), 0.24 (s, 9H); <sup>13</sup>C NMR (100 MHz, CDCl<sub>3</sub>) δ 140.0, 137.6, 137.2, 137.0, 132.6, 132.3, 130.0, 129.19, 129.13, 128.4, 127.9, 123.7, 104.8, 94.9, 89.2, 68.0, 59.0, 56.6, 51.9, 50.7, 22.0, 21.2, 0.09; FT-IR (neat) 2828, 2157, 1634, 1490, 1249, 1128, 1015 cm<sup>-1</sup>; HRMS (ESI) *m/z* [M+H]<sup>+</sup> calcd for C<sub>31</sub>H<sub>37</sub>ClN<sub>3</sub>Si: 514.2440, found: 514.2444.

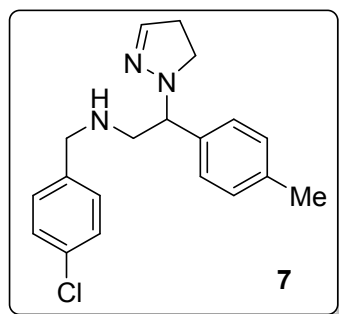

***N*-(4-Chlorobenzyl)-2-(4,5-dihydro-1H-pyrazol-1-yl)-2-(*p*-tolyl)ethan-1-amine **7**.**

1-(4-Bromophenyl)-2-(4-chlorobenzyl)-4-(*p*-tolyl)hexahydro-6H-pyrazolo[1,2-a][1,2,4]triazine **3fa** (50 mg, 0.1 mmol) and TFA (2 mL) were stirred at 70 °C for 2 h under air. The reaction mixture

was then cooled to room temperature and diluted with ethyl acetate (5 mL). The resultant solution was treated with saturated aq. NaHCO<sub>3</sub> solution (10 mL) and extracted with ethyl acetate (3×10 mL). Drying (Na<sub>2</sub>SO<sub>4</sub>) and evaporation of the solvent gave a residue that was purified on silica gel column chromatography using ethyl acetate and hexane as an eluent to give **7**. Analytical TLC on silica gel, 1:1 ethyl acetate/hexane R<sub>f</sub>= 0.42; thick liquid; yield 63% (21 mg); <sup>1</sup>H NMR (400 MHz, CDCl<sub>3</sub>) δ 7.19-7.11 (m, 6H), 7.06-7.04 (m, 2H), 6.699-6.690 (m, 1H), 3.94-3.91 (m, 1H), 3.75-3.68 (m, 2H), 3.37-3.32 (m, 1H), 2.91-2.87 (m, 1H), 2.78-2.73 (m, 2H), 2.52-2.37 (m, 2H), 2.25 (s, 3H), 1.95 (s, 1H); <sup>13</sup>C NMR (100 MHz, CDCl<sub>3</sub>) δ 143.1, 139.0, 137.4, 136.2, 132.5, 129.5, 129.1, 128.57, 128.54, 68.0, 53.7, 53.2, 50.7, 33.3, 21.2; FT-IR (neat) 3320, 2919, 2839, 1490, 1407, 1286, 1088, 1014 cm<sup>-1</sup>; HRMS (ESI) *m/z* [M+H]<sup>+</sup> calcd for C<sub>19</sub>H<sub>23</sub>ClN<sub>3</sub>: 328.1575, found: 328.1593.

**Large-scale Preparation of 3aa.** 6-Phenyl-1,5-diazabicyclo[3.1.0]hexane **1a** (800 mg, 5 mmol), 1-(4-chlorobenzyl)-2-(*p*-tolyl)aziridine **2a** (1288 mg, 5 mmol) and FeCl<sub>3</sub> (81 mg, 0.5 mmol) were stirred in dichloromethane (50 mL) at room temperature (25 °C) for 5 minutes. Next, the reaction mixture was diluted with dichloromethane (20 mL) and passed through a short pad of celite using dichloromethane (100 mL). Evaporation of the solvent gave a residue that was purified on silica gel column chromatography using ethyl acetate and hexane as an eluent to yield **3aa** in 86% yield (1.8 g).

## References

- 1 For preparation of diaziridines, see: a) V. V. Kuznetsov, S. A. Kutepov, N. N. Makhova, K. A. Lyssenko and D. E. Dmitriev, *Russ. Chem. Bull.*, 2003, **52**, 665; b) Y. B. Koptelov, *Russ. J. Org. Chem.*, 2006, **42**, 1510; c) A. W. Beebe, E. F. Dohmeierb and G. Moura-Letts, *Chem. Commun.*, 2015, **51**, 13511; d) A. O. Chagarovskiy, V. S. Vasin, V. V. Kuznetsov, O. A. Ivanova, V. B. Rybakov, A. N. Shumsky, N. N. Makhova and I. V. Trushkov, *Angew. Chem. Int. Ed.*, 2018, **57**, 10338; e) S. Arora, V. Palani and T. R. Hoye, *Org. Lett.*, 2018, **20**, 8082.
- 2 For preparation of aziridines, see: a) C. Nicolas, J. Lacour, *Org. Lett.*, 2006, **8**, 4343; b) Y. Du, Y. Wu, A.-H. Liu and L.-N. He, *J. Org. Chem.*, 2008, **73**, 4709; c) Z.-Z. Yang, L.-N. He, S.-Y. Peng and A.-H. Liu, *Green Chem.*, 2010, **12**, 1850; d) Xi. Wu, L. Li and J. Zhang, *Adv. Synth. Catal.*, 2012, **354**, 3485.
- 3 For preparation of chiral aziridines, see: J. L. Vicario, D. Badia and L. Carrillo, *ARKIVOC* 2007, **38**, 304.
- 4 J. F. Larrow and E. N. Jacobsen, *Org. Synth.*, 1998, **75**, 1.
- 5 R. T. Ruck and E. N. Jacobsen, *J. Am. Chem. Soc.*, 2002, **124**, 2882.
- 6 a) H. Guo, H. Liu, F.-L. Zhu, R. Na, H. Jiang, Y. Wu, L. Zhang, Z. Li, H. Yu, B. Wang, Y. Xiao, X.-P. Hu and M. Wang, *Angew. Chem. Int. Ed.*, 2013, **52**, 12641.
- 7 a) M. Prieto, E. Zurita, E. Rosa, L. Muñoz, P. Lloyd-Williams and E. Giralt, *J. Org. Chem.*, 2004, **69**, 6812; b) E. Hoque, R. Bisht, C. Haldar and B. Chattopadhyay, *J. Am. Chem. Soc.*, 2017, **139**, 7745; c) S. Roy, S. K. Das and B. Chattopadhyay, *Angew. Chem. Int. Ed.*, 2018, **57**, 2238.

# NMR Spectra

TS-4-CL-BZ-AZ-1H

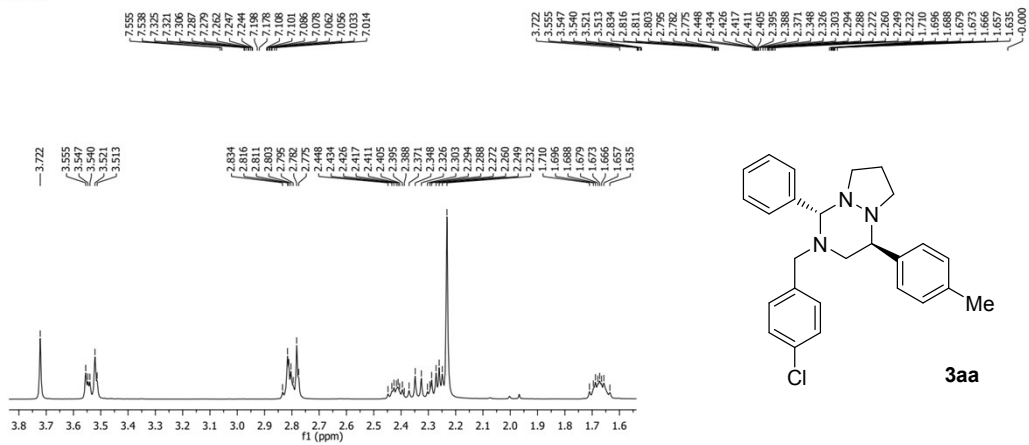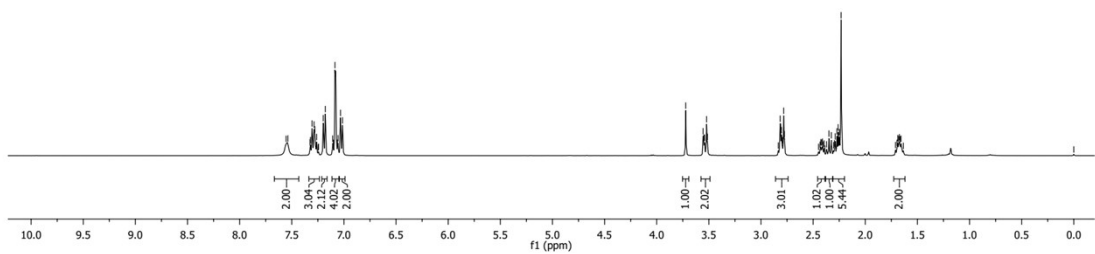

TS-4-CL-BZ-AZ-13C

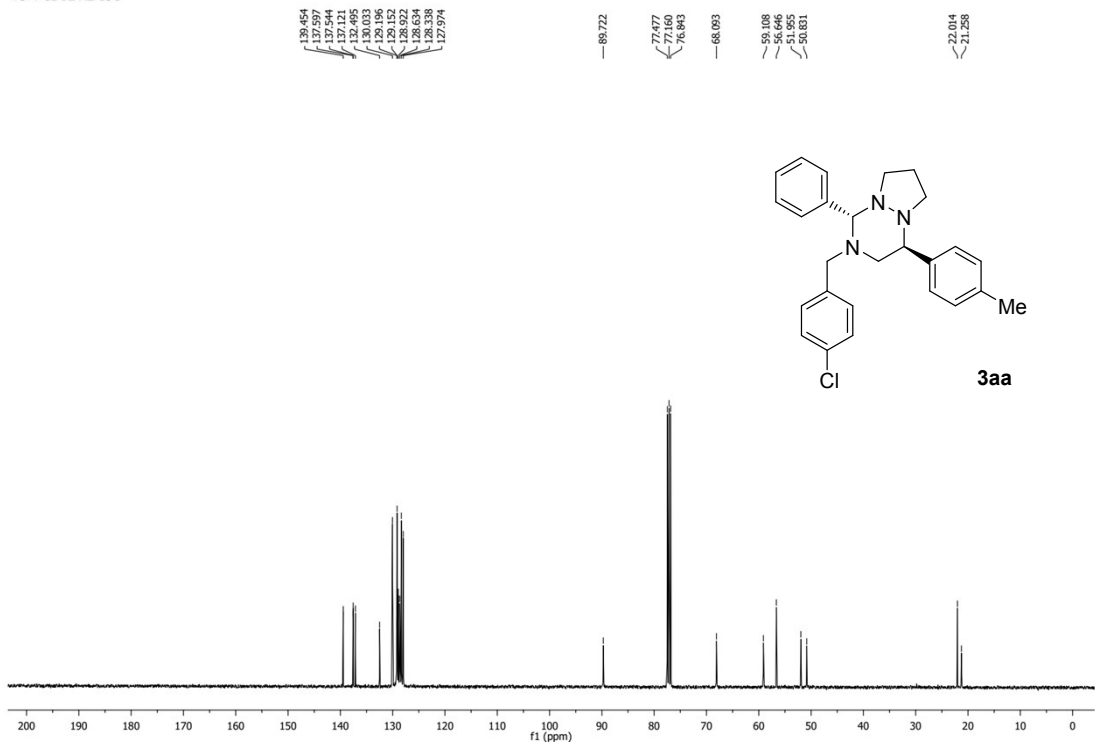

TS-NO2-DIAZ-BZ-AZ-1H

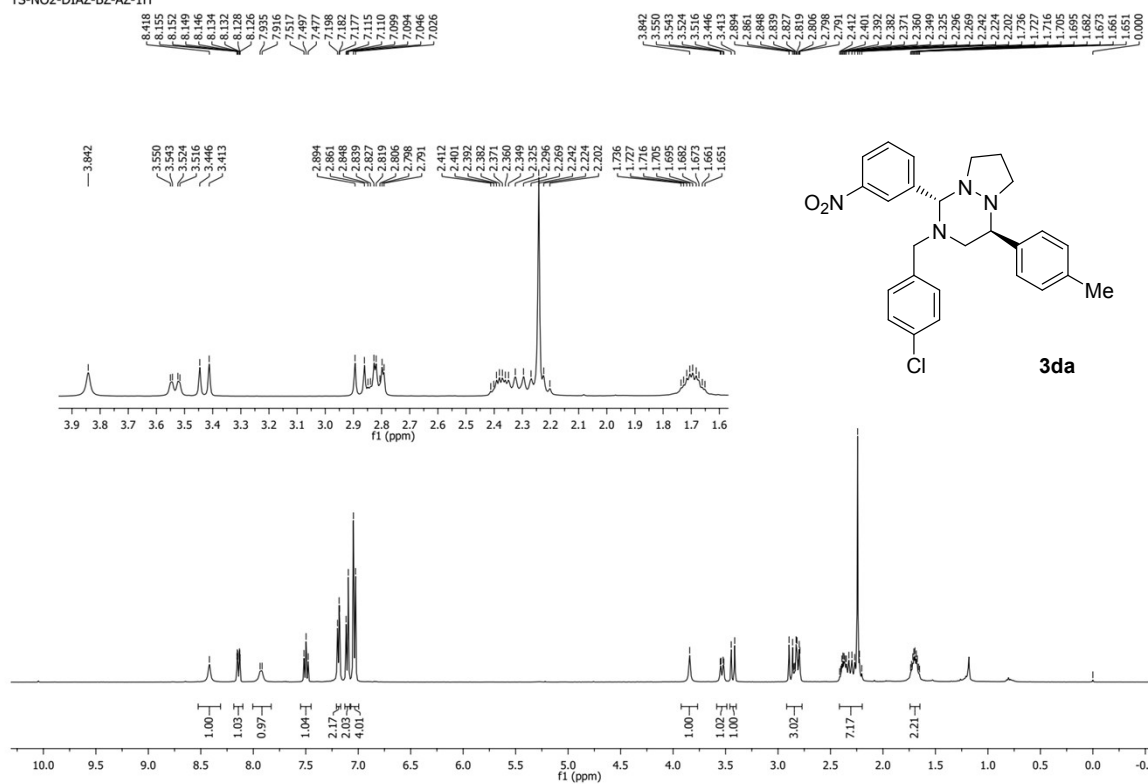

TS-3-NO2-DIAZ-AZ-13C

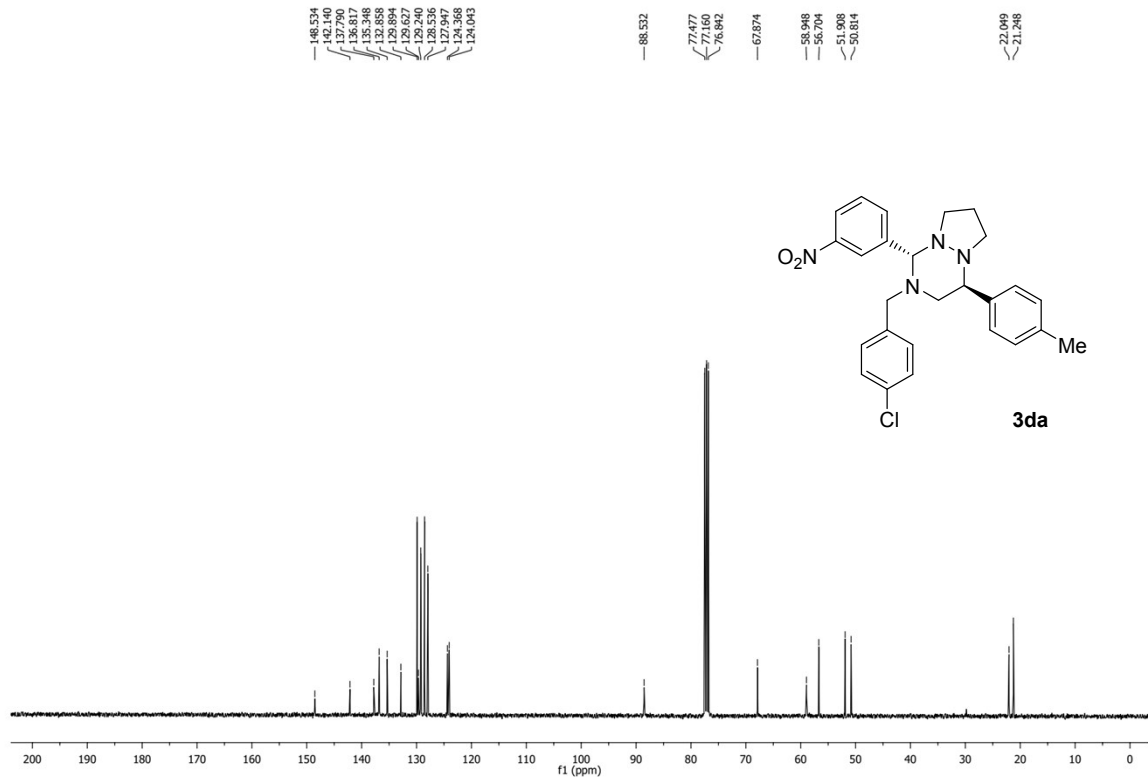

TS-3-CF3-DIAZ-AZ-1H

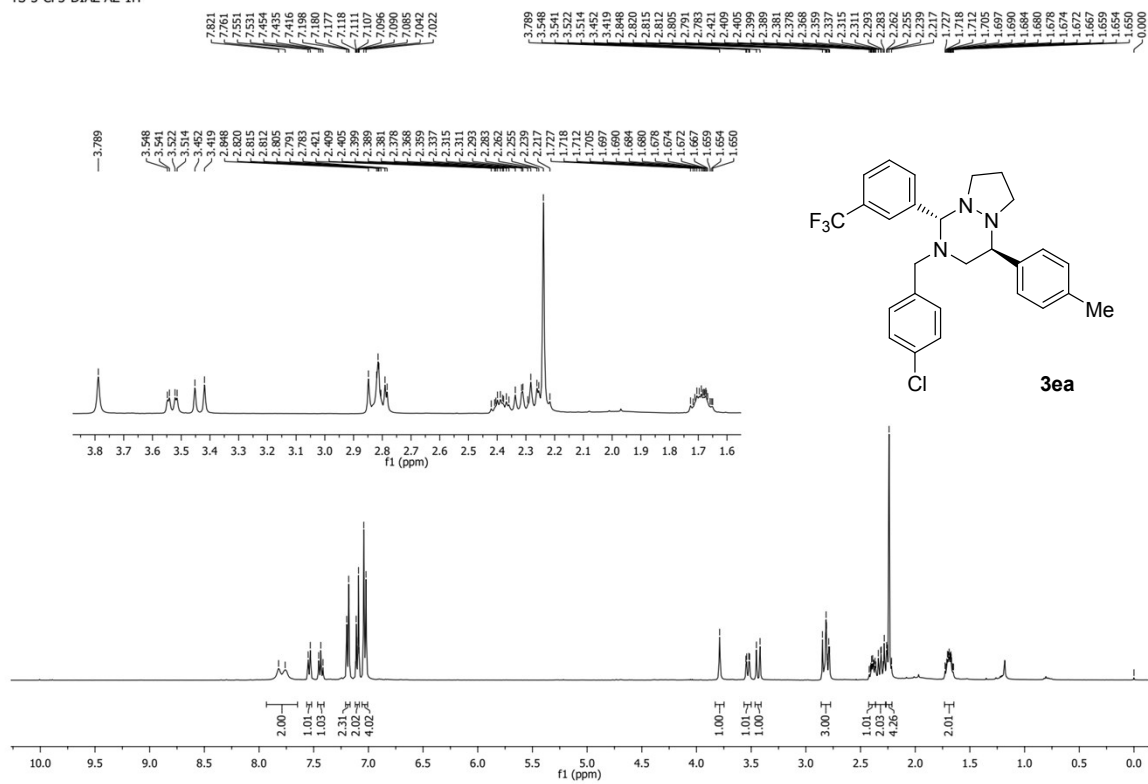

TS-3-CF3-DIAZ-AZ-13C

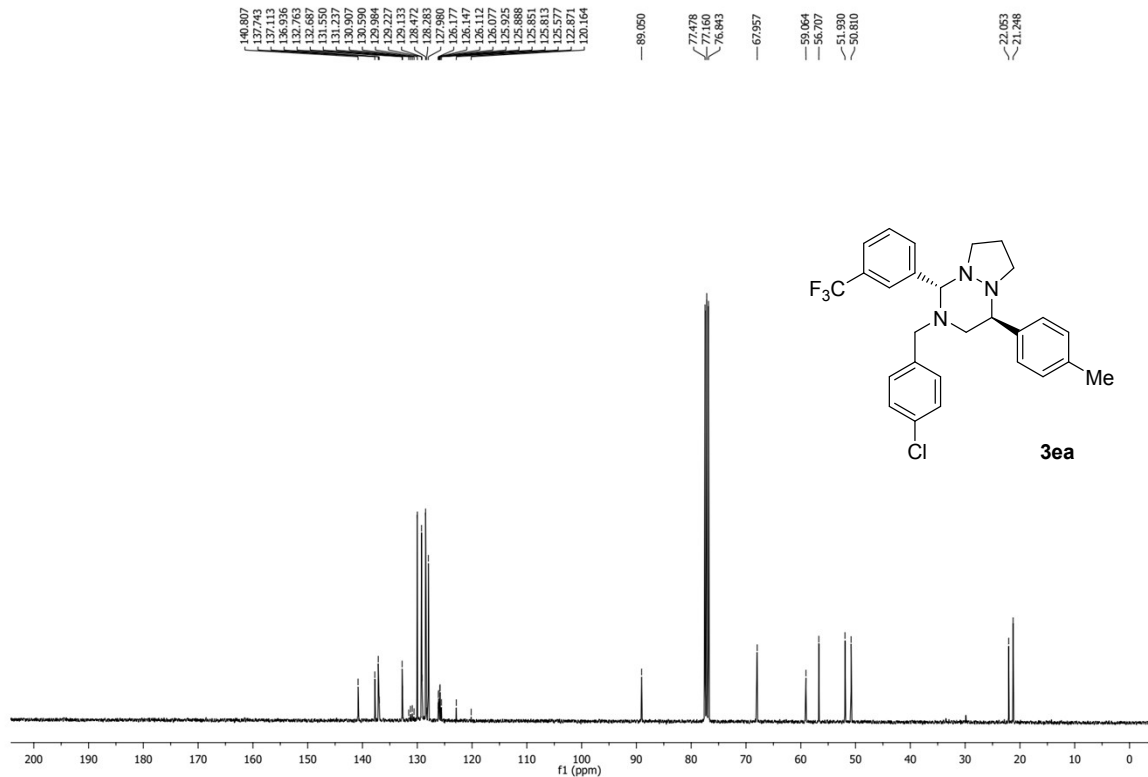

TS-3-CF3-DIAZ-AZ-19F

—62.353

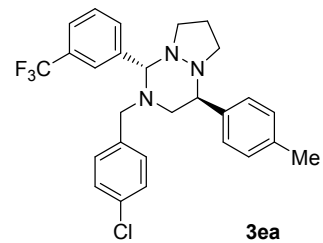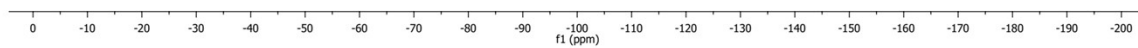

TS-4-BR-DIAZ-AZ-1H

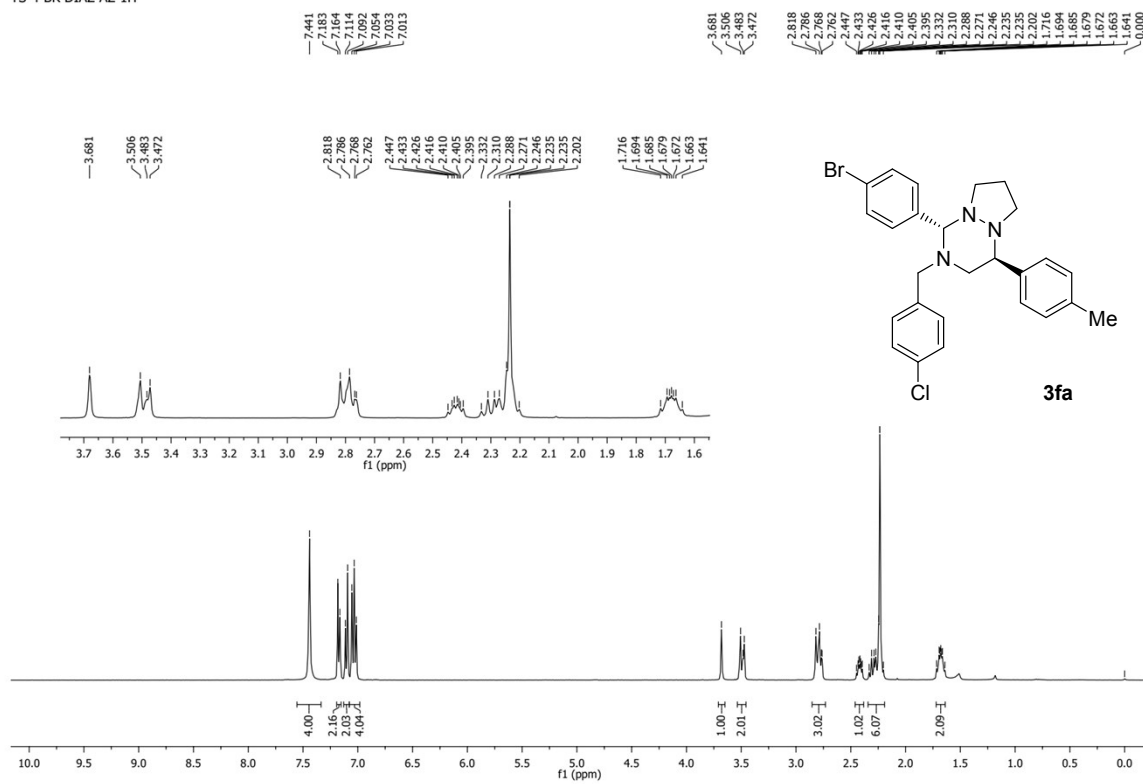

TS-4-BR-DIAZ-AZ-13C

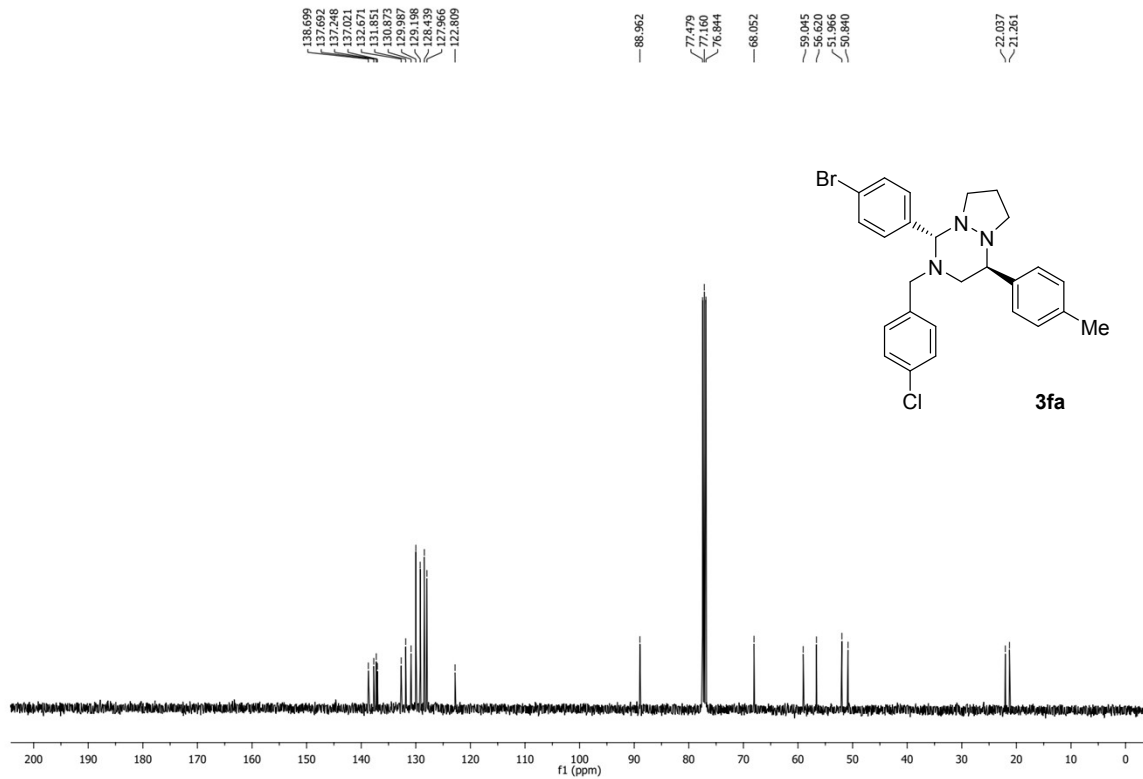



TS-4-CN-DIAZ-AZ-1H

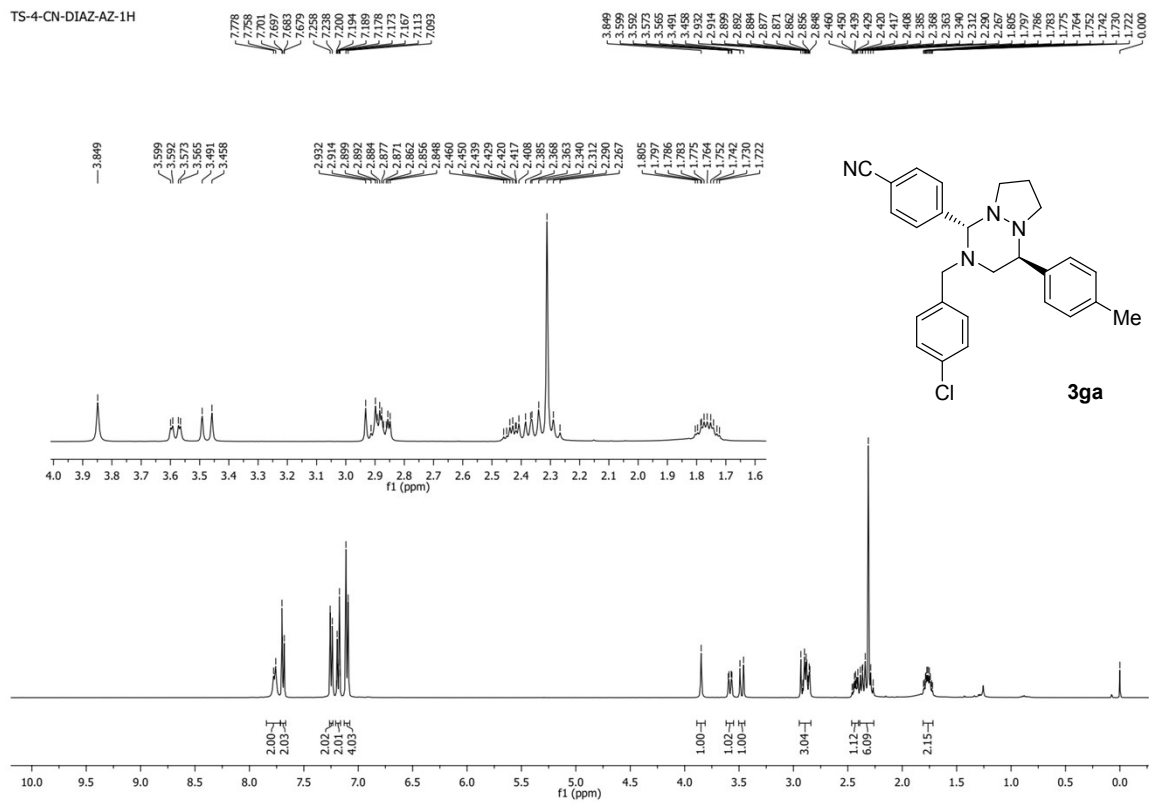

TS-4-CN-DIAZ-AZ-13C

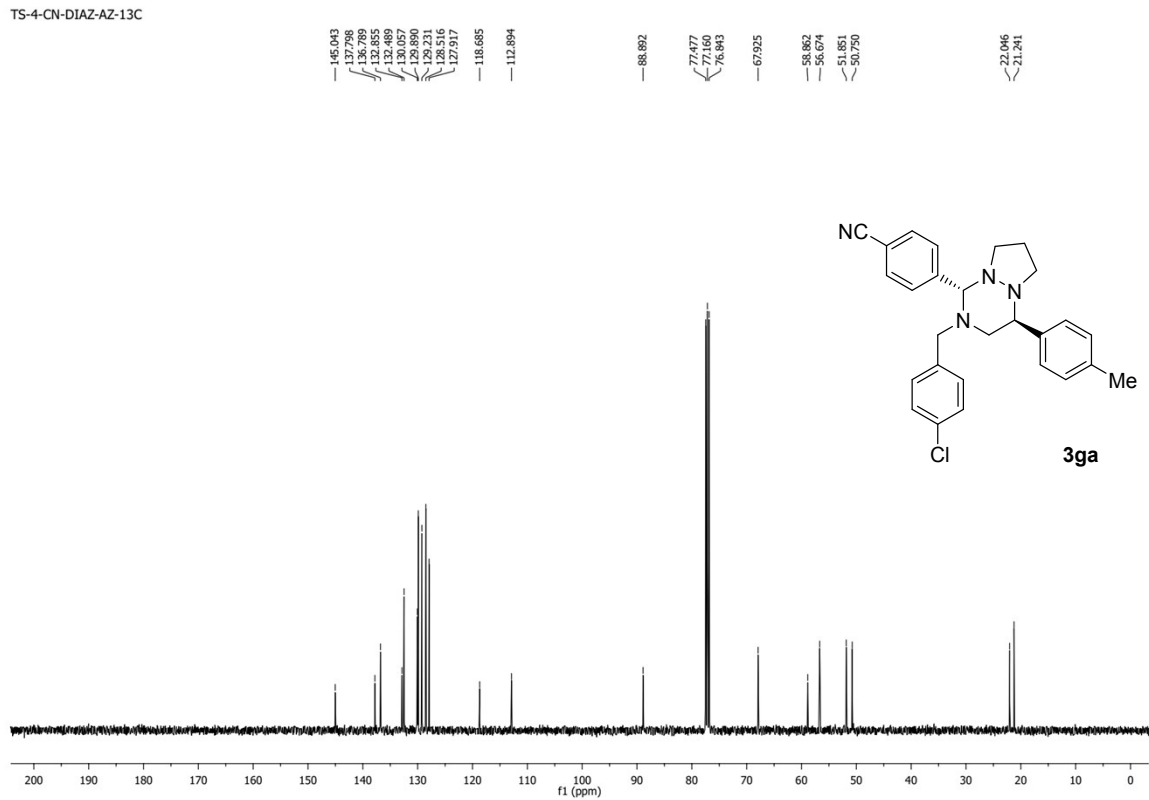

TS-EST-DIAZ-AZ-1H

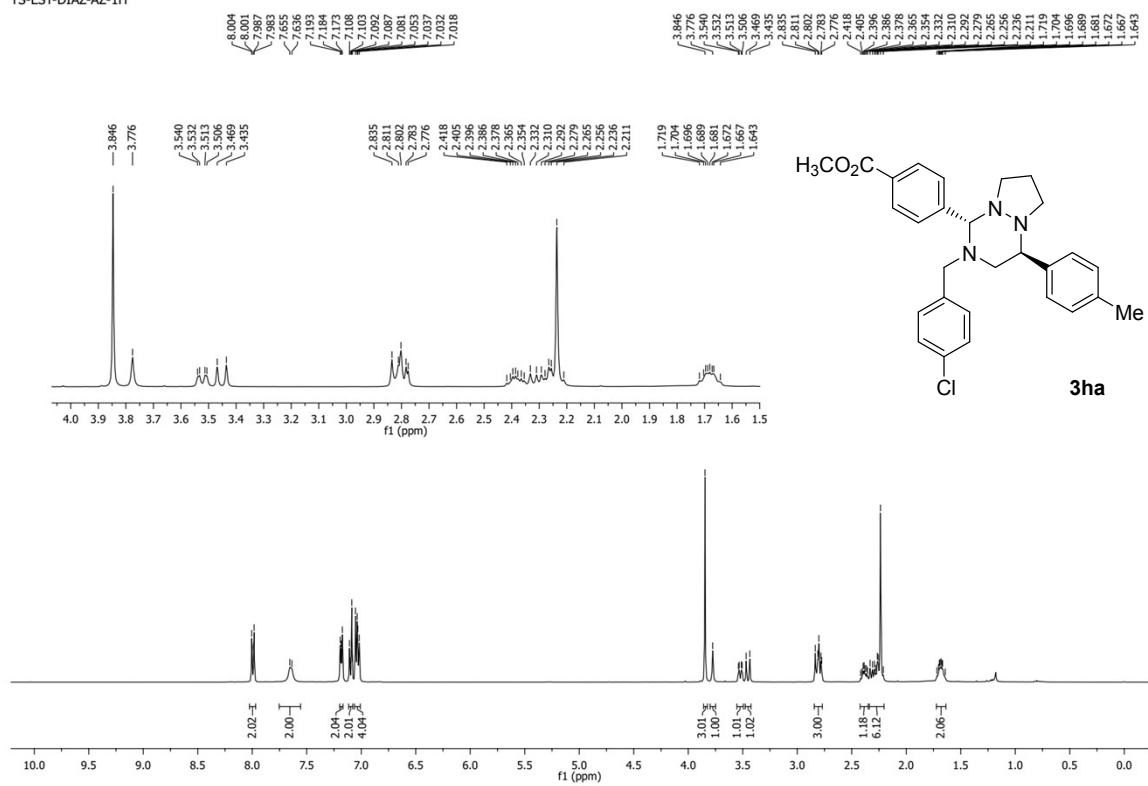

TS-EST-DIAZ-AZ-13C

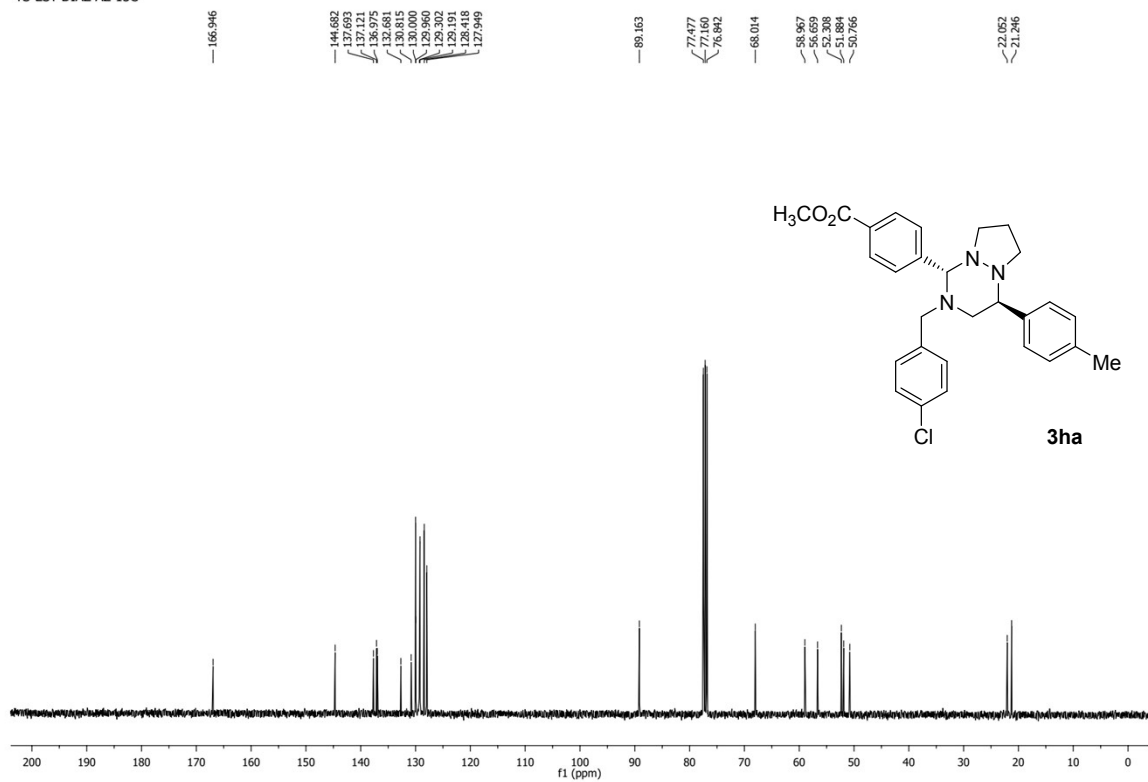

TS-4-OME-DIAZ-AZ-1H

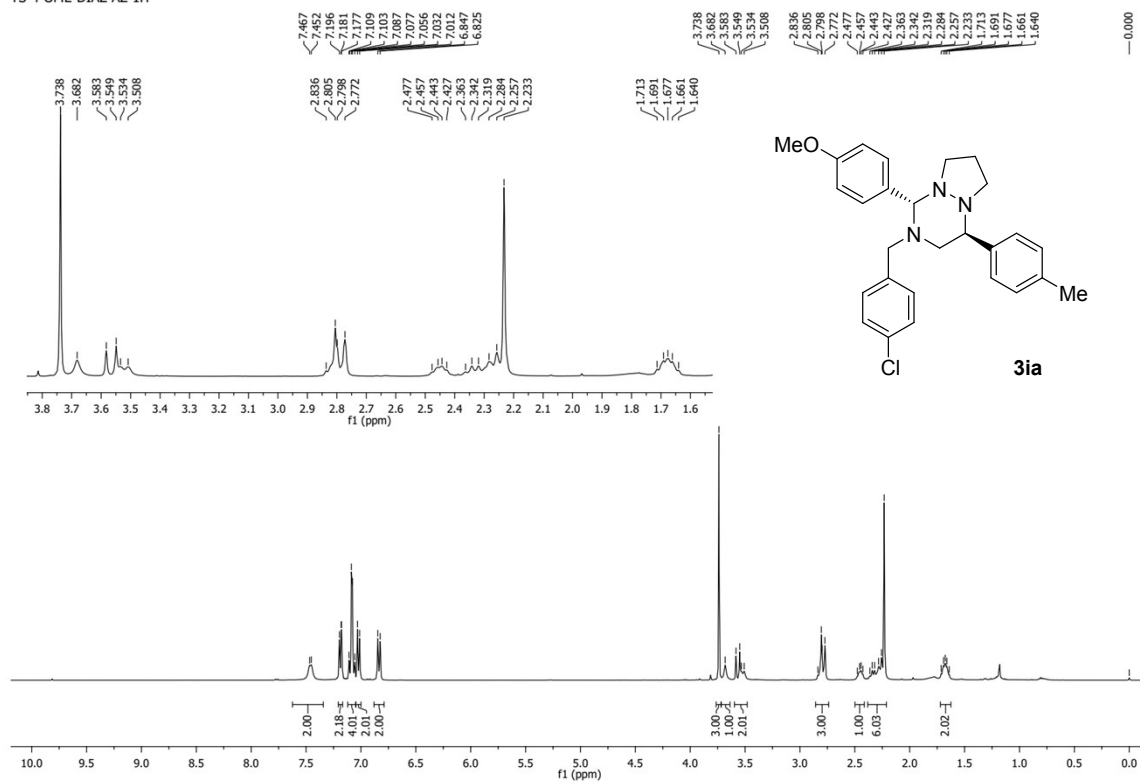

TS-4-OME-DIAZ-AZ-13C

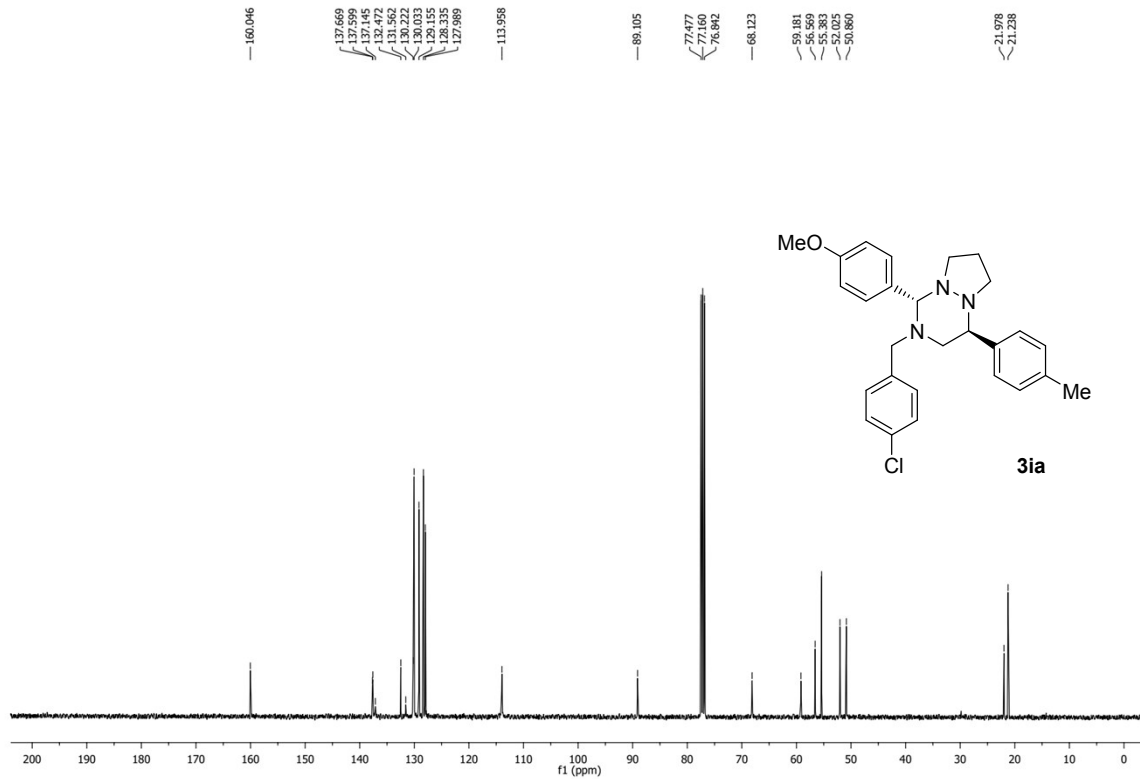

TS-4-NO2-DIAZ-AZ-3-1H

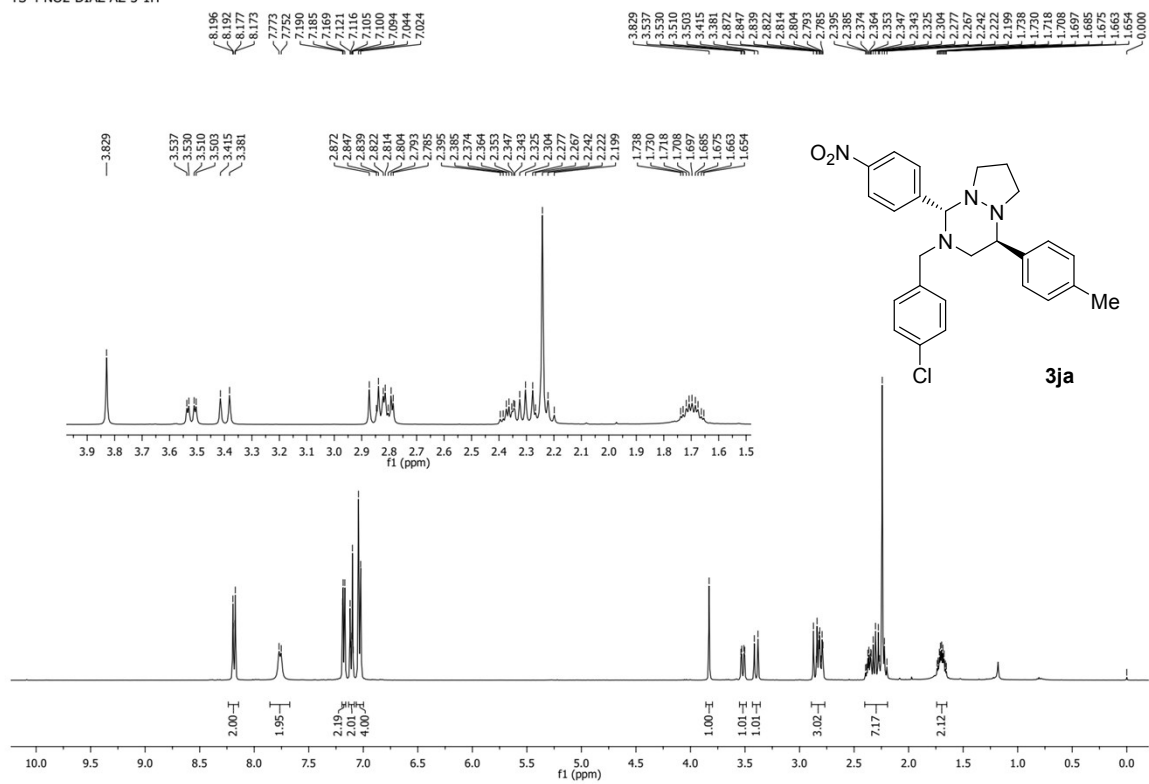

TS-4-NO2-DIAZ-BZ-AZ-13C

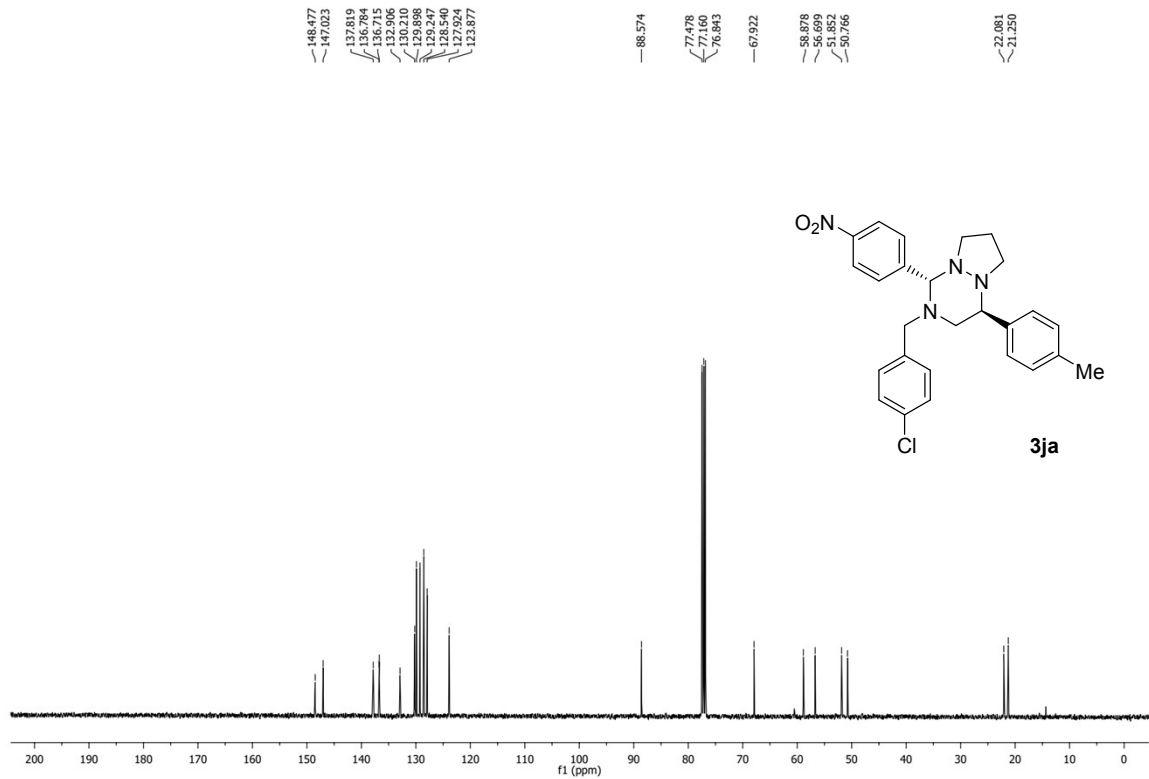

4-PH-DIAZ-AZ

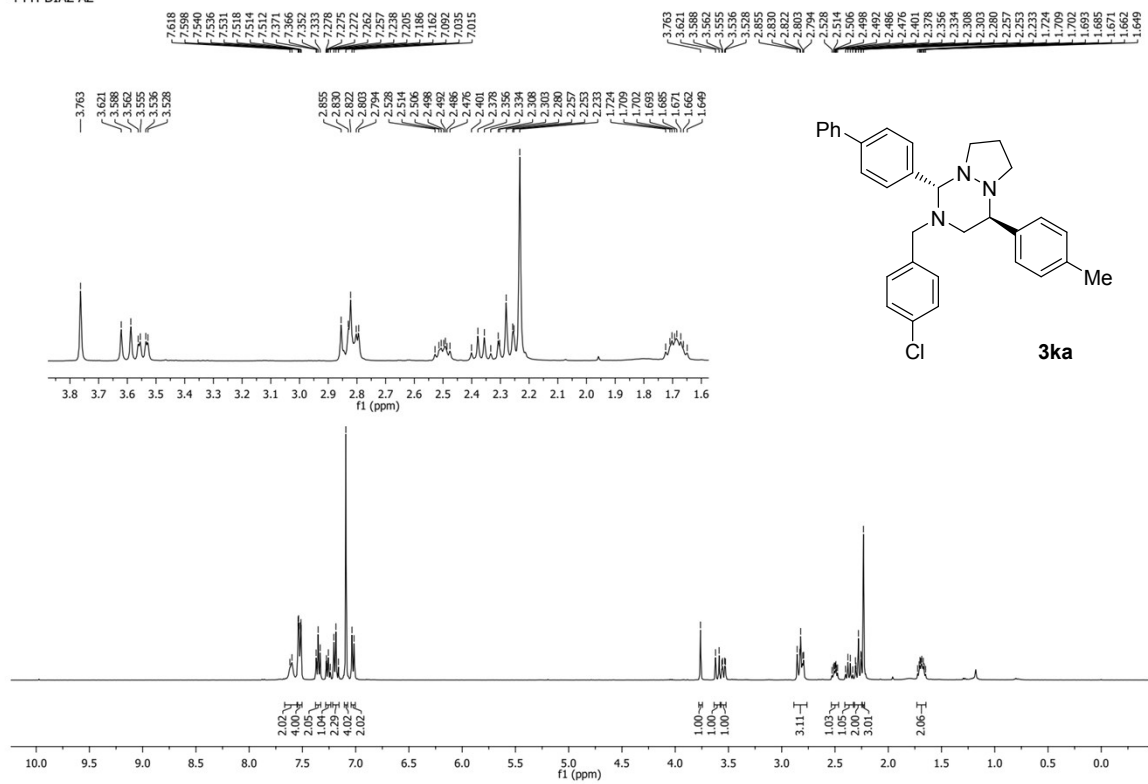

TS-4-PH-DIAZ-AZ-13C

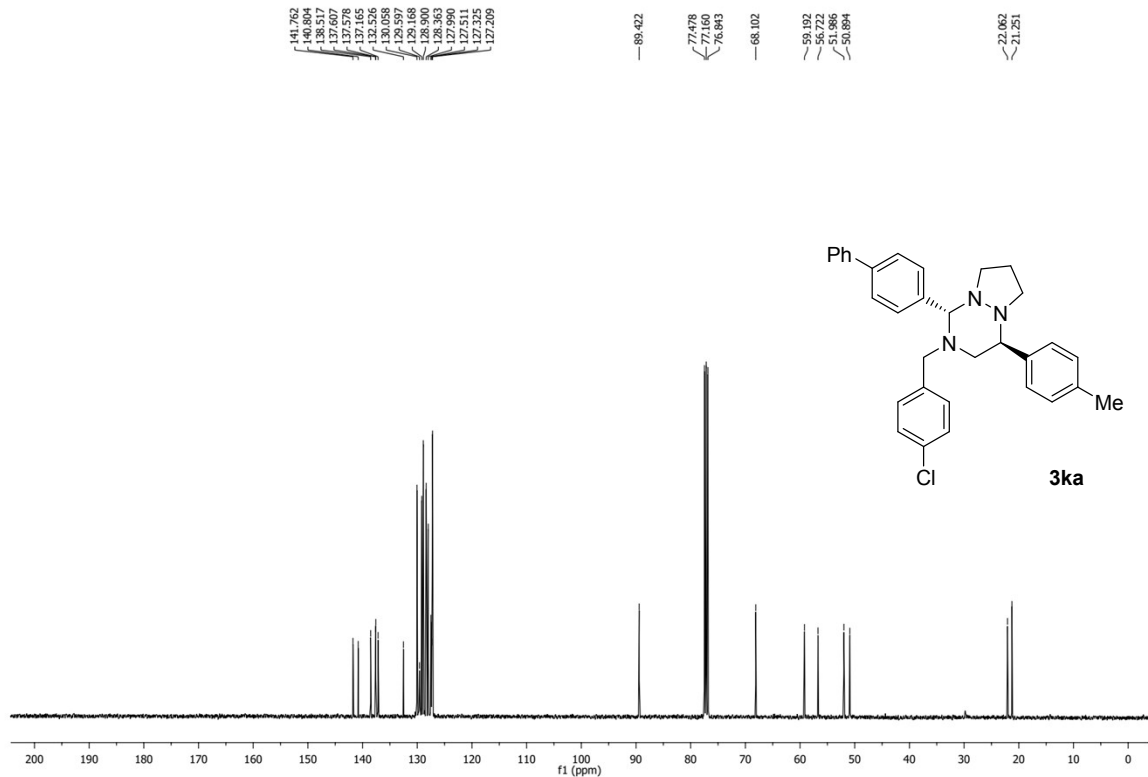

TS-FURAN-DIAZ-AZ-1H

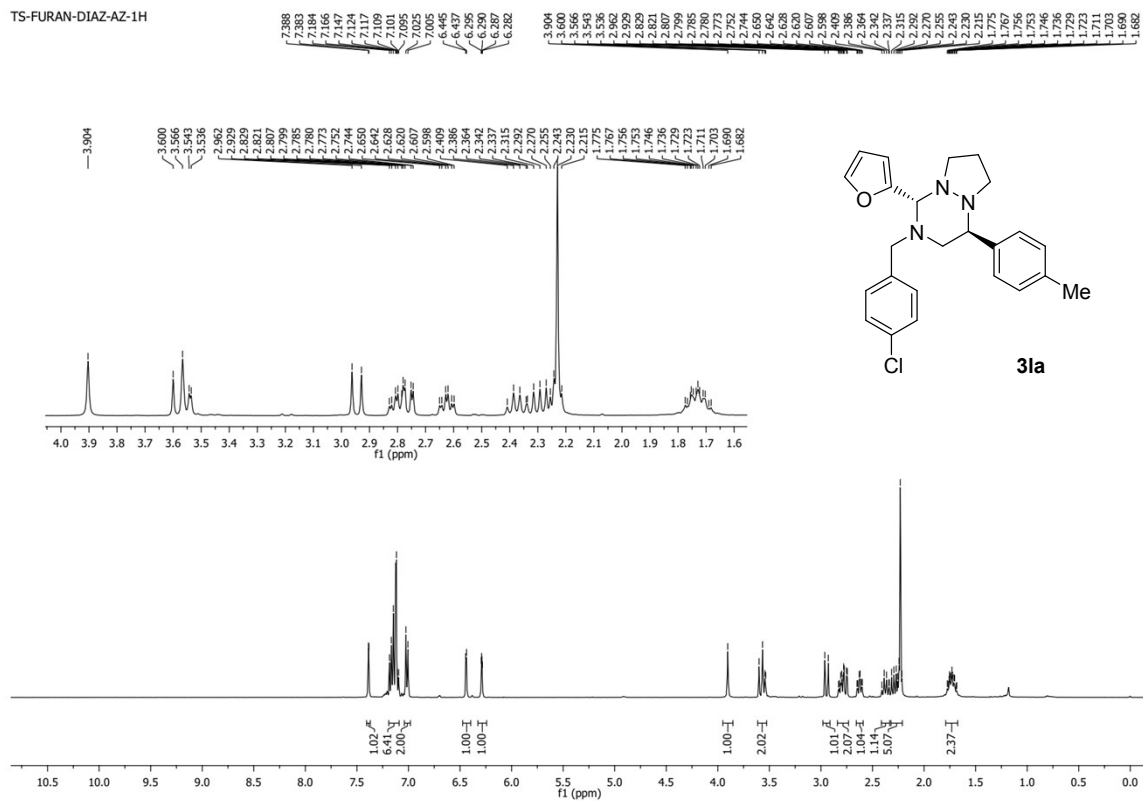

TS-FURAN-DIAZ-AZ-13C

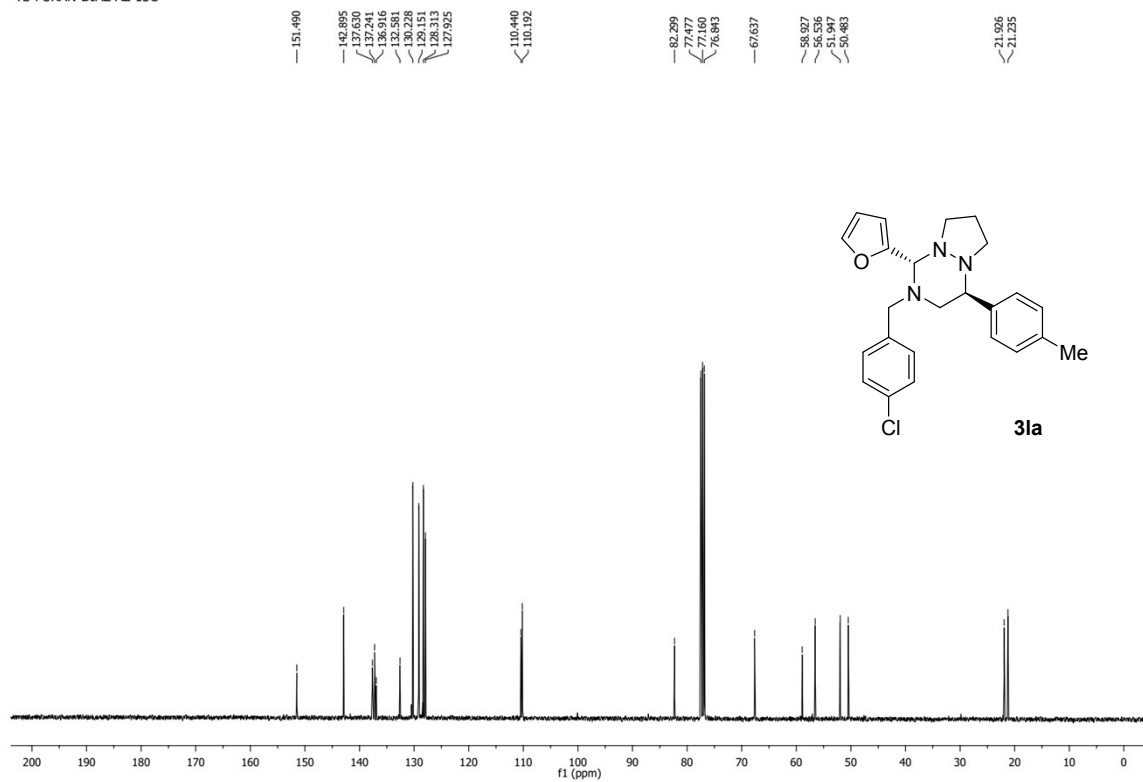







TS-2-NAPH-DIAZ-AZ-1H

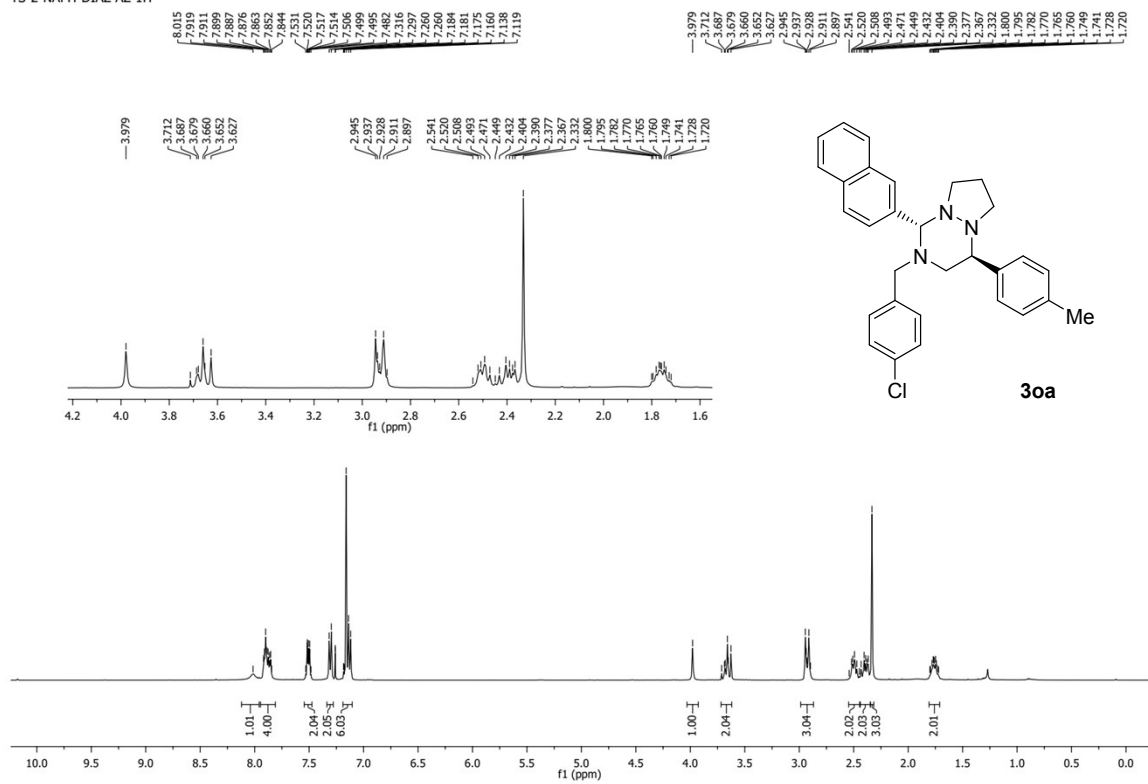

TS-2-NAPH-DIAZ-AZ-13C

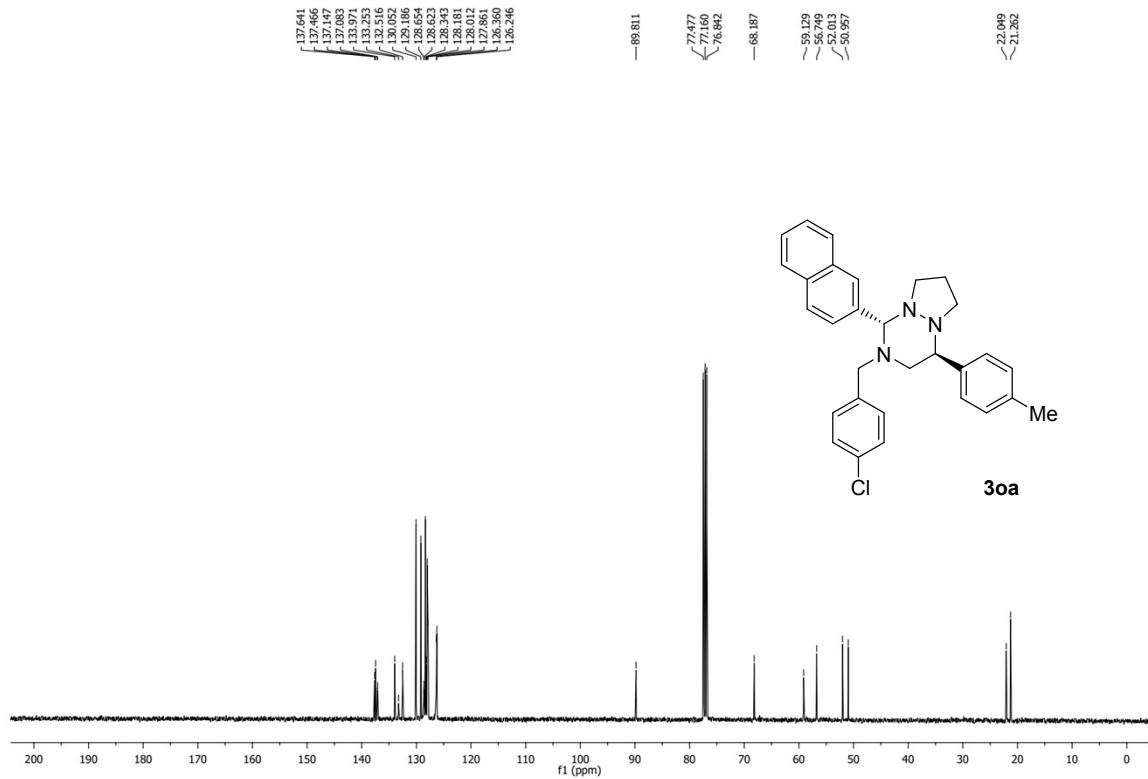

TS-TRIMETHOXY-DIAZ-AZ-1H

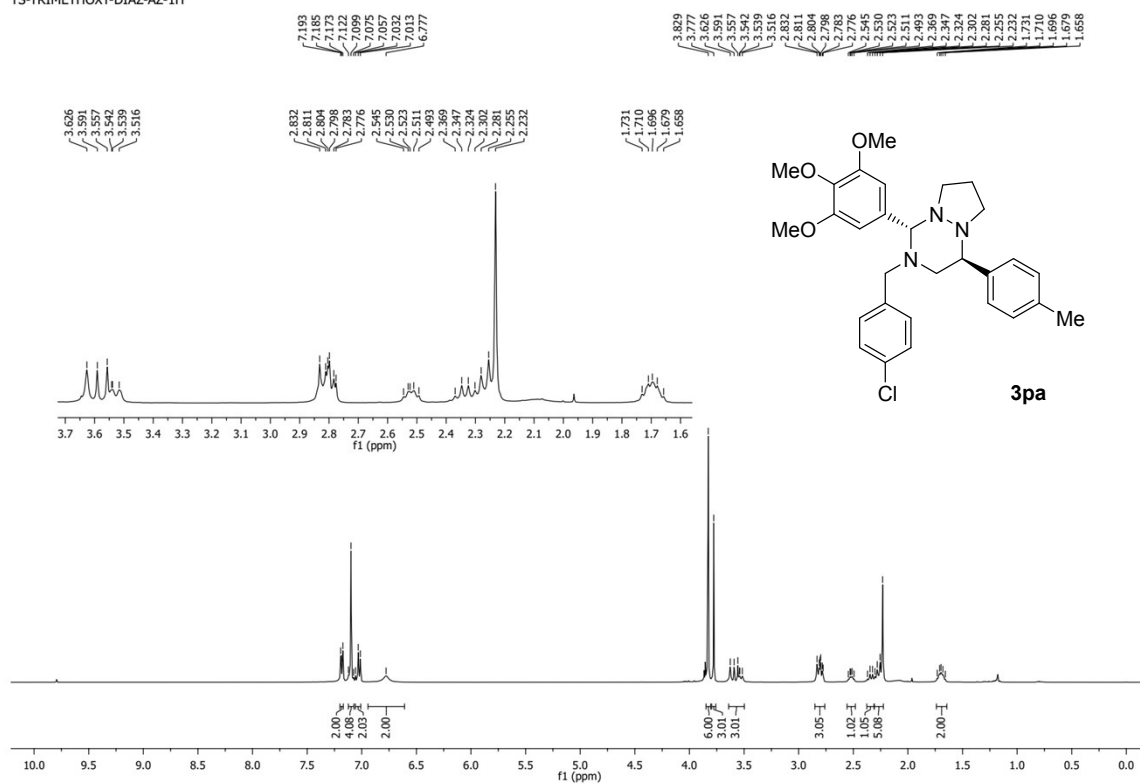

TS-TRIMETHOXY-DIAZ-AZ-13C

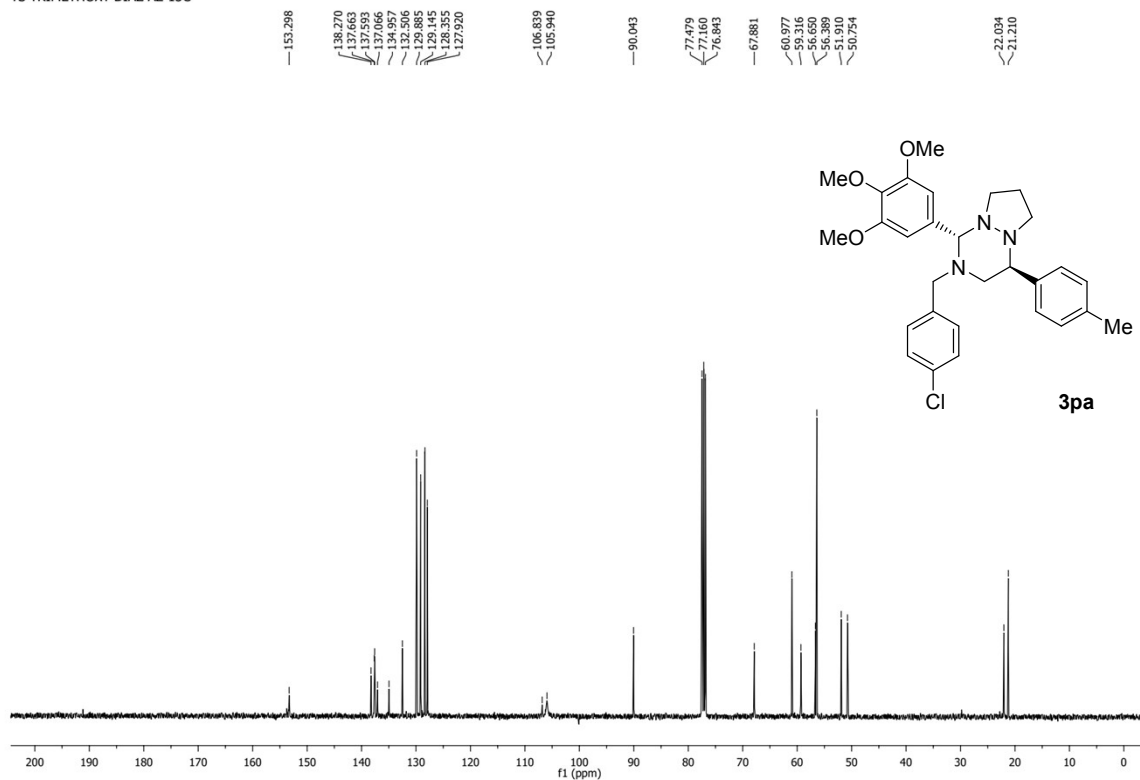



TS-PYRENE-1H

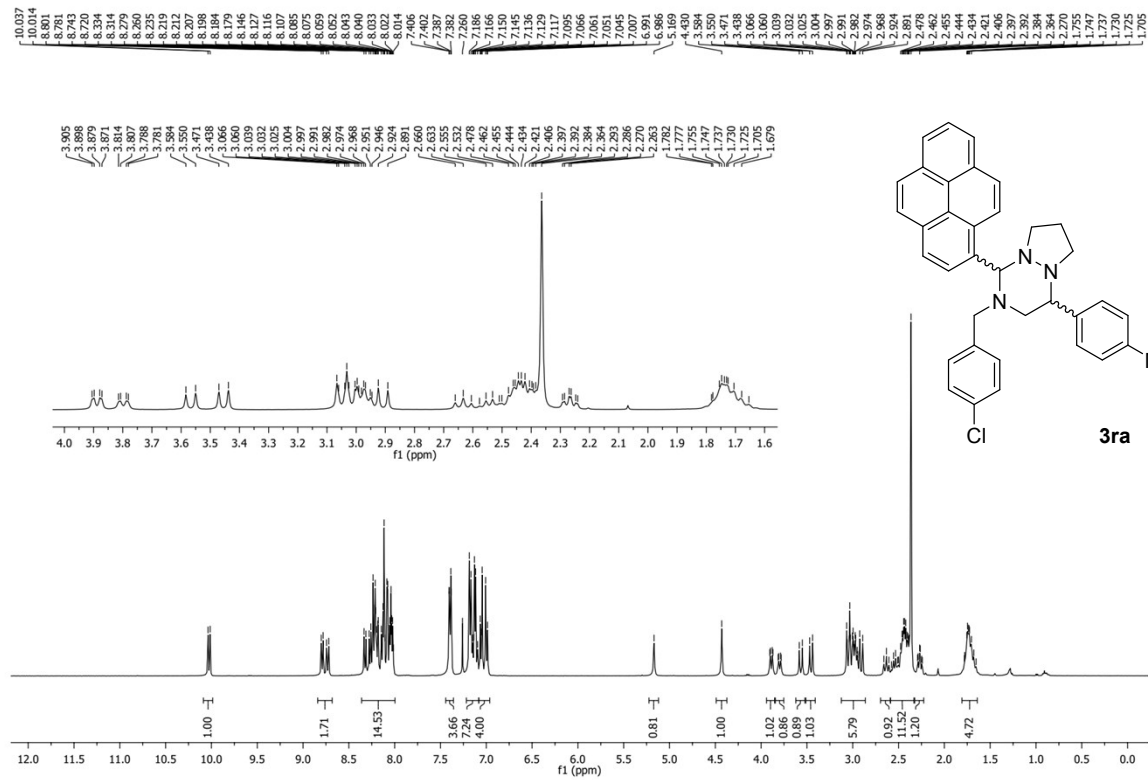

TS-PYRENE-DIAZ-13C

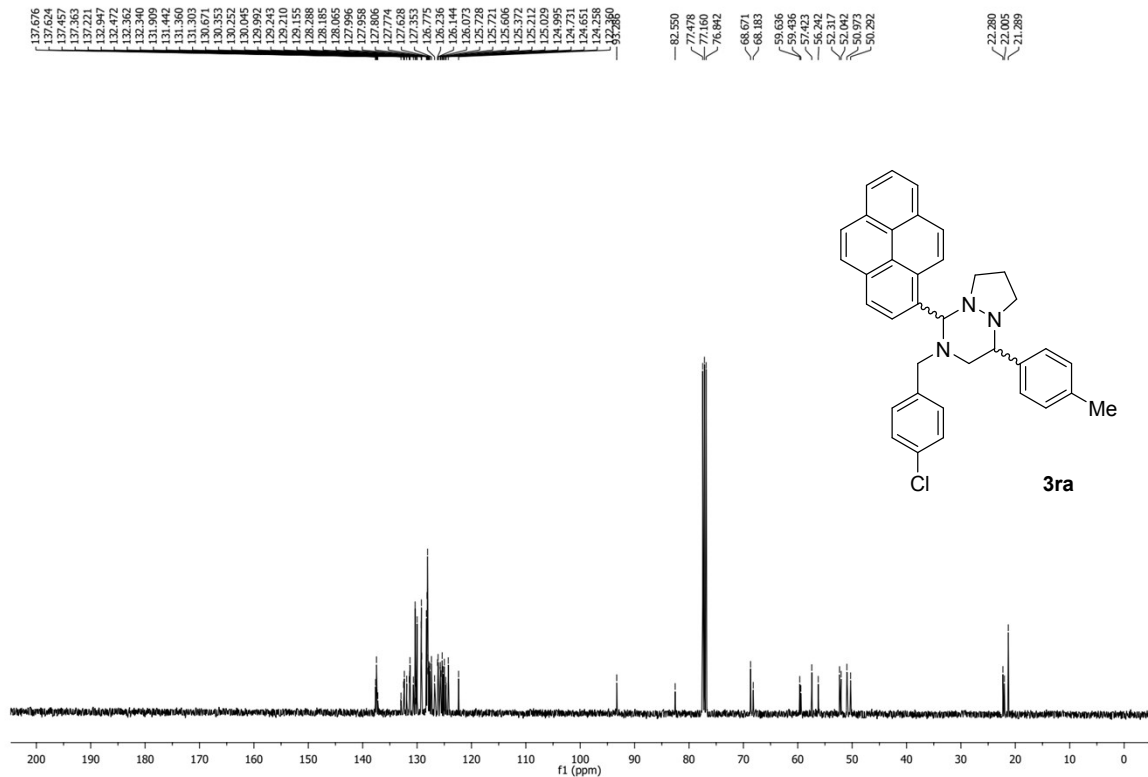

TS-DIME-DIAZ-AZ-1H

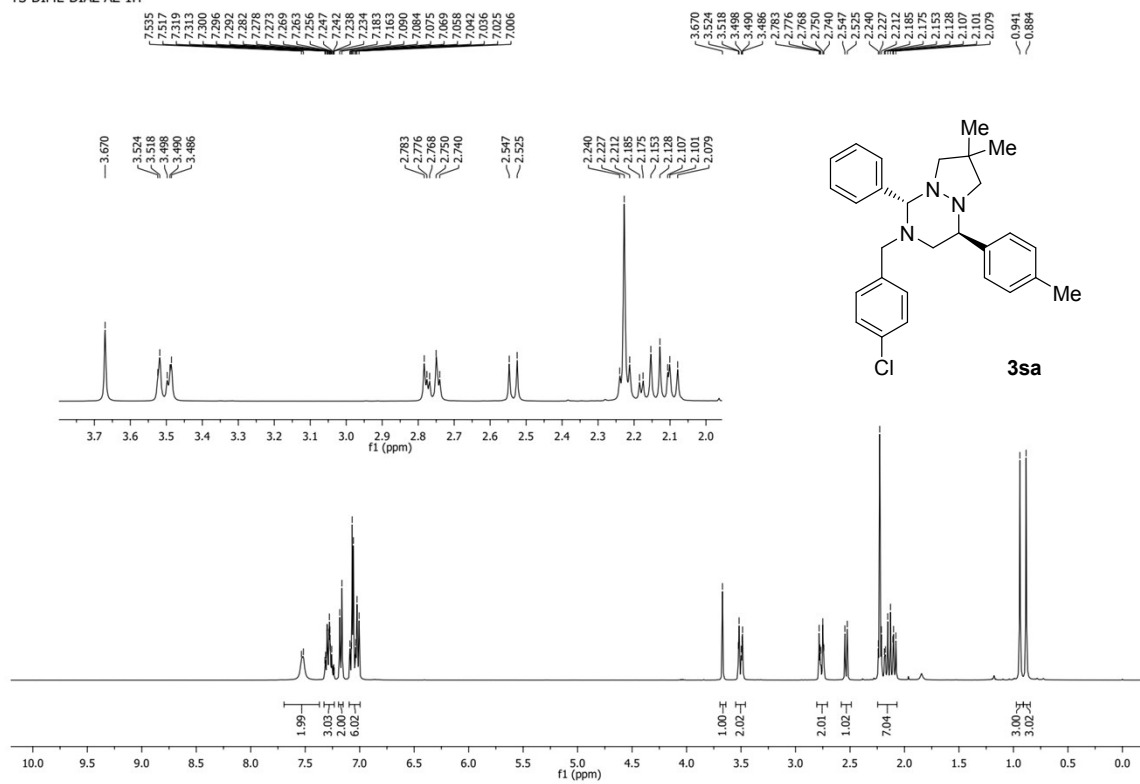

TS-DIME-DIAZ-AZ-13C

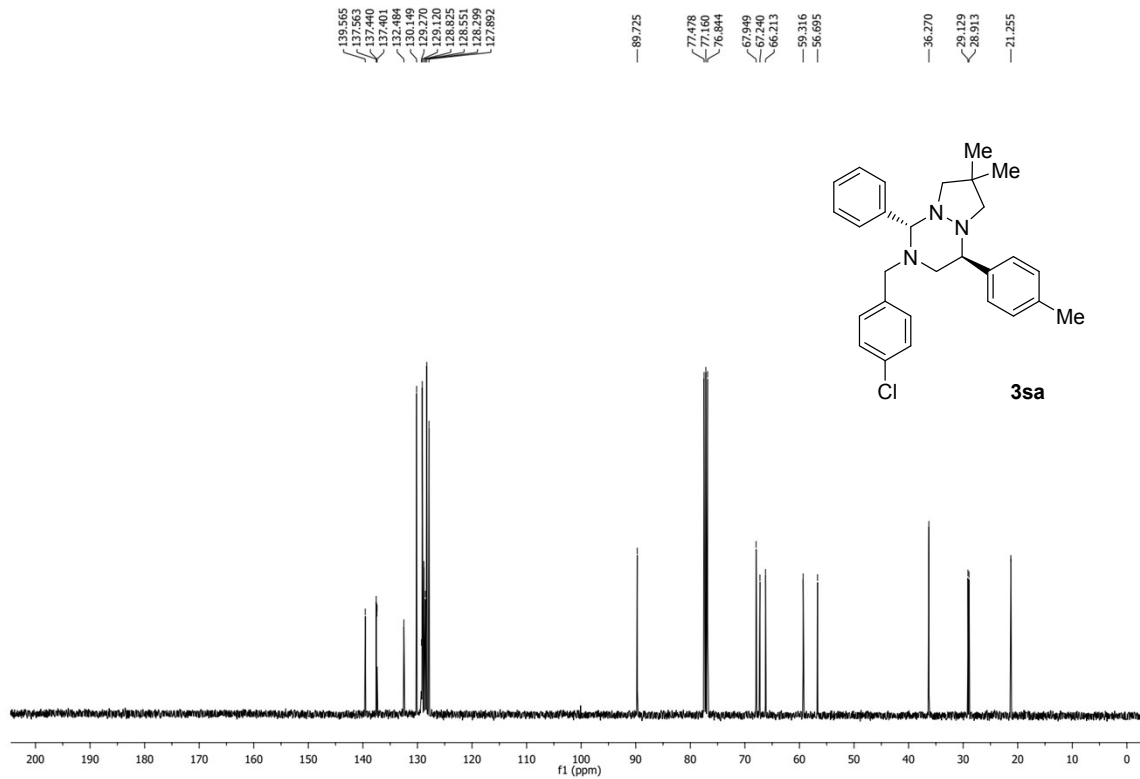



TS-N-BUTYL-AZ-1H

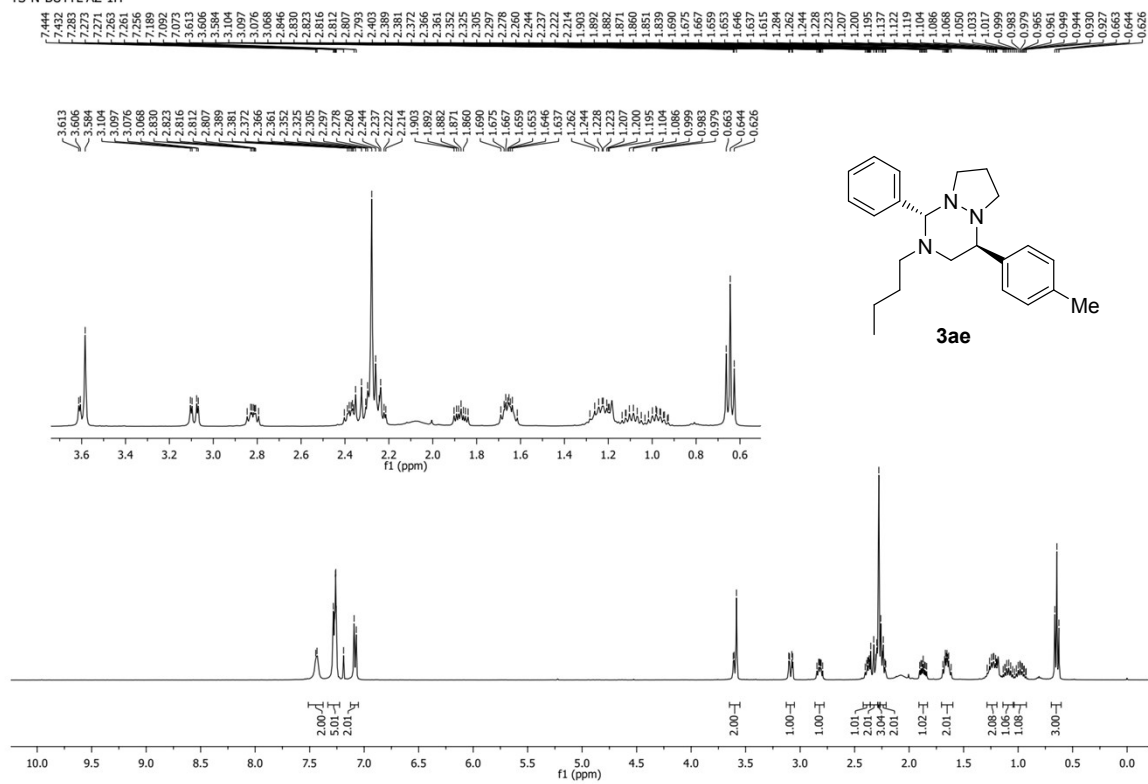

TS-N-BUTYL-AZ-13C

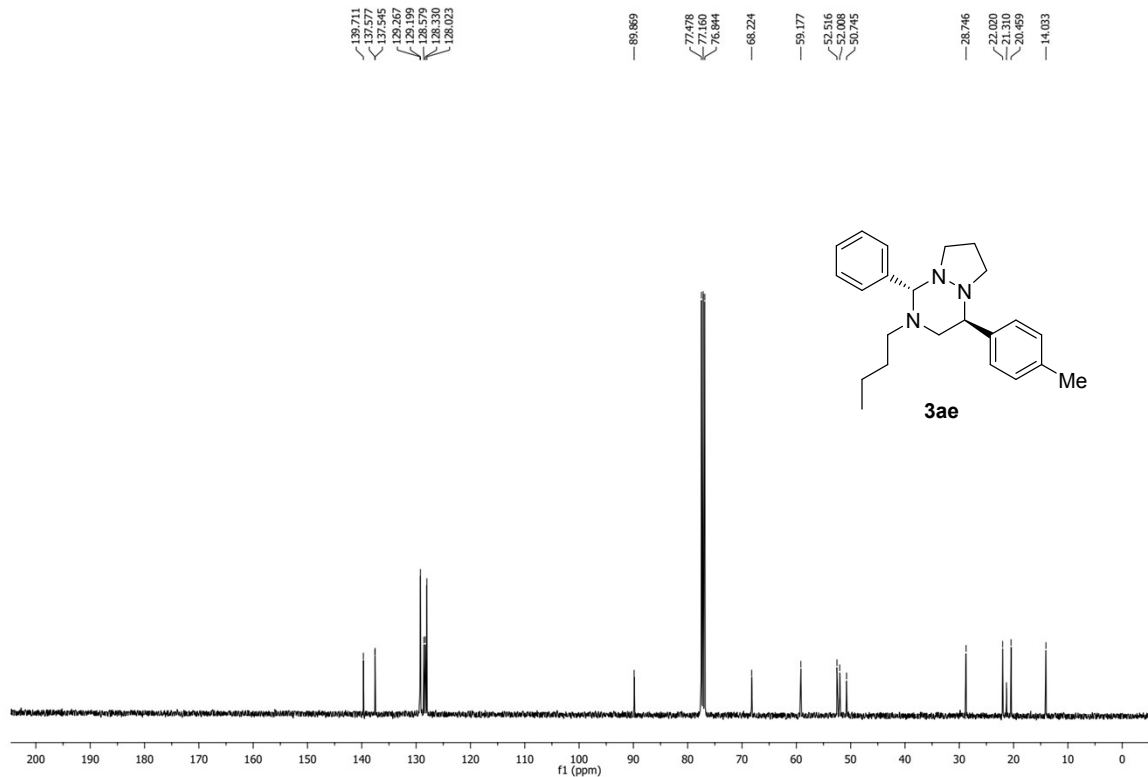





TS-CYH-1H

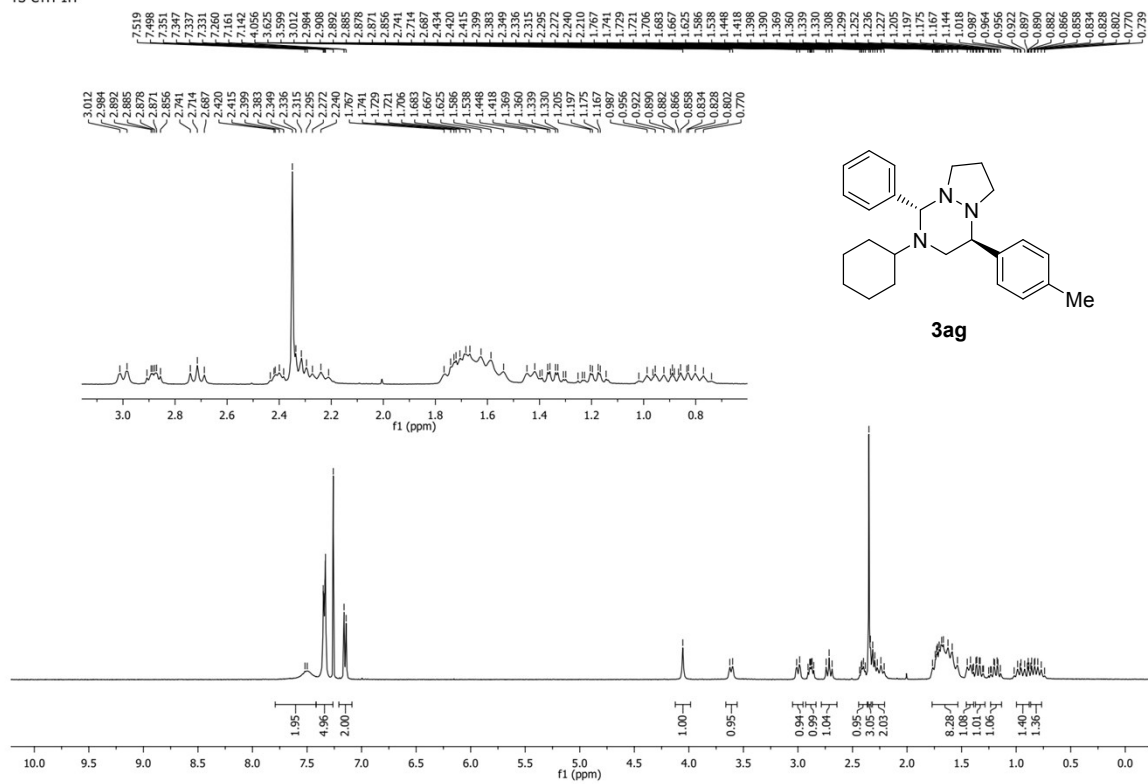

TS-N-CYH-DIAZ-AZ-13C-2

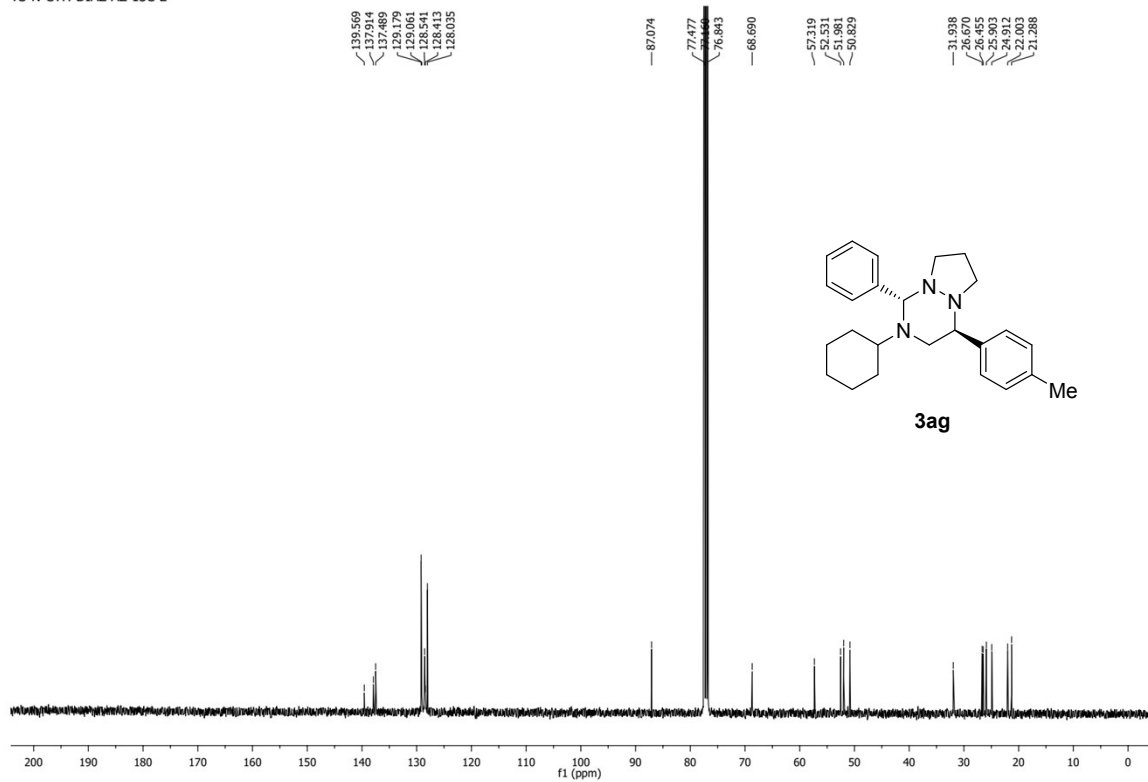

TS-N-CYP-AZ-1H

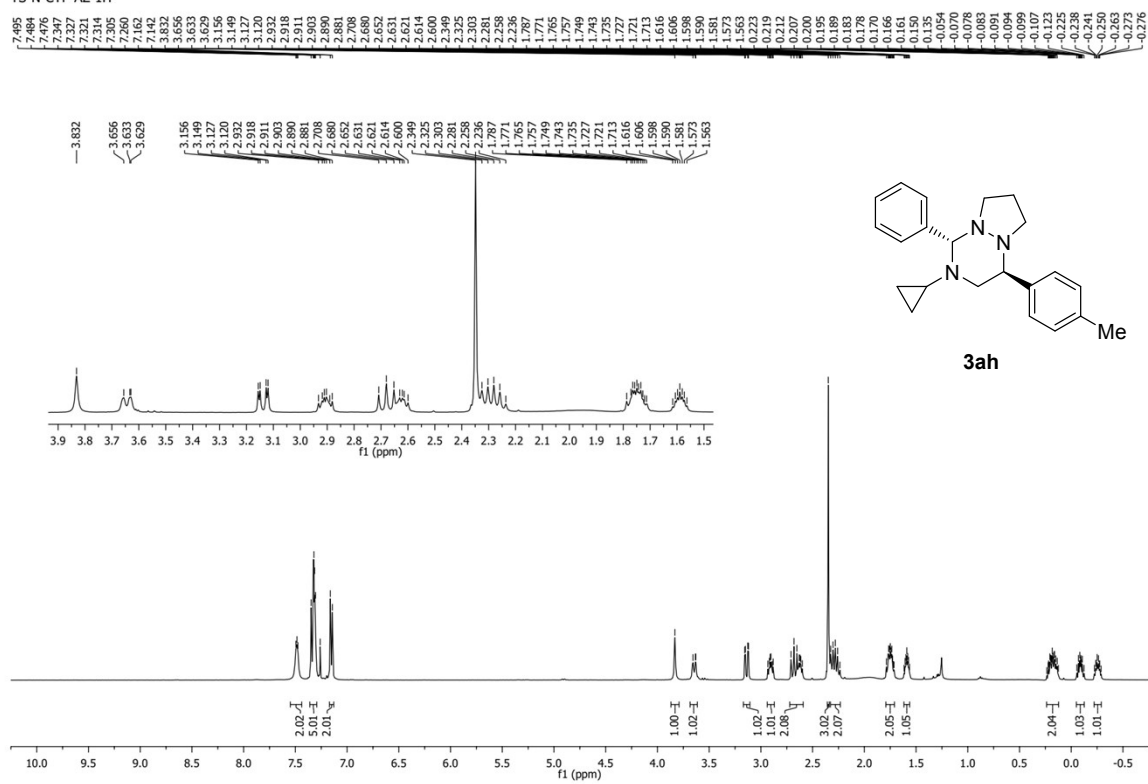

TS-CYP-13C

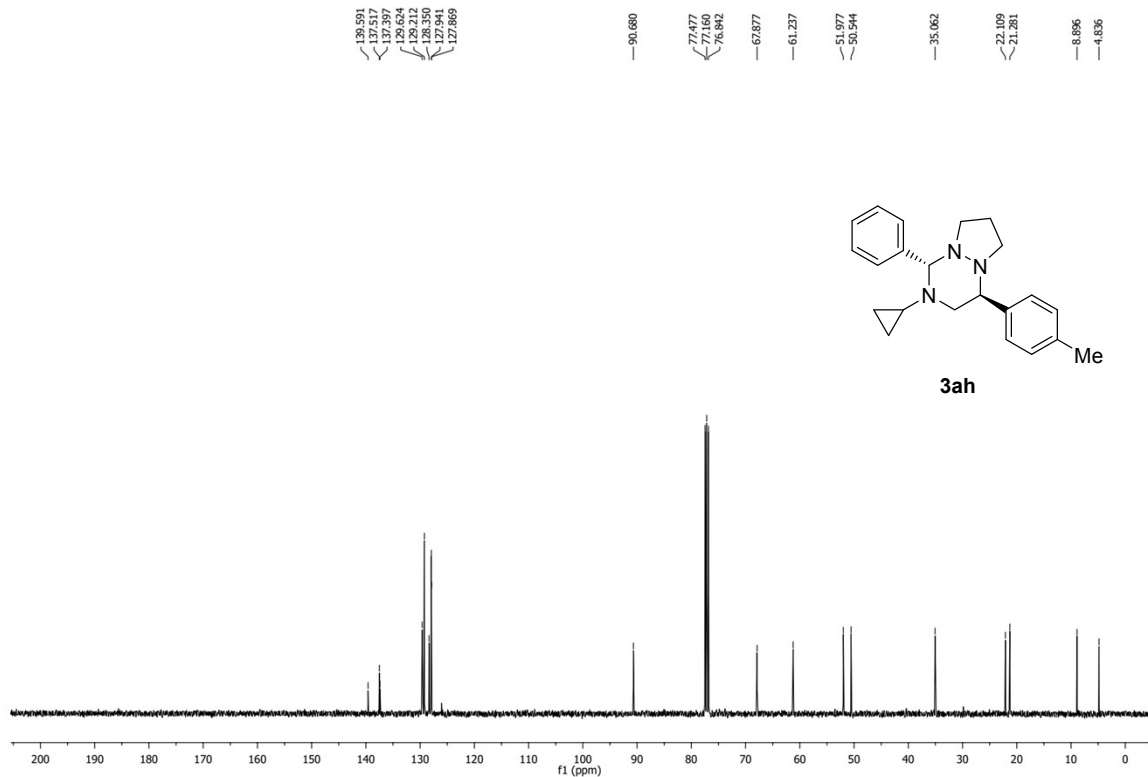

TS-N-ISOPROPYL-1H

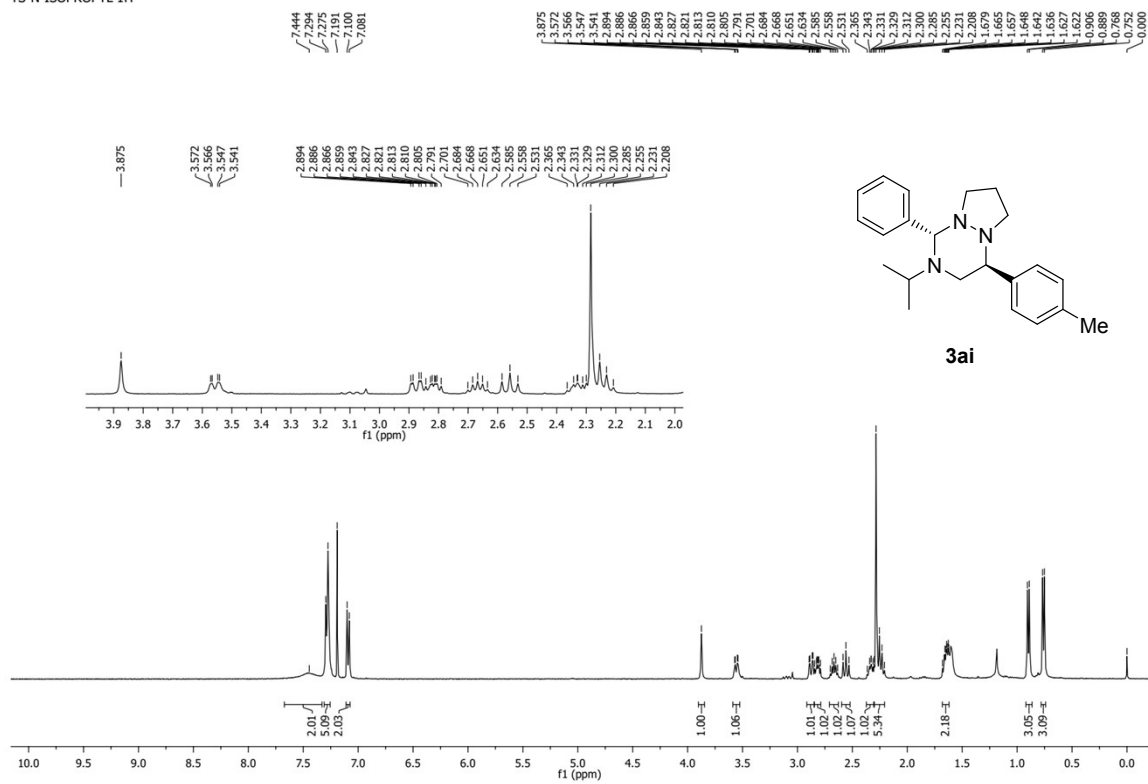

TS-N-ISOPROP-AZ-13C

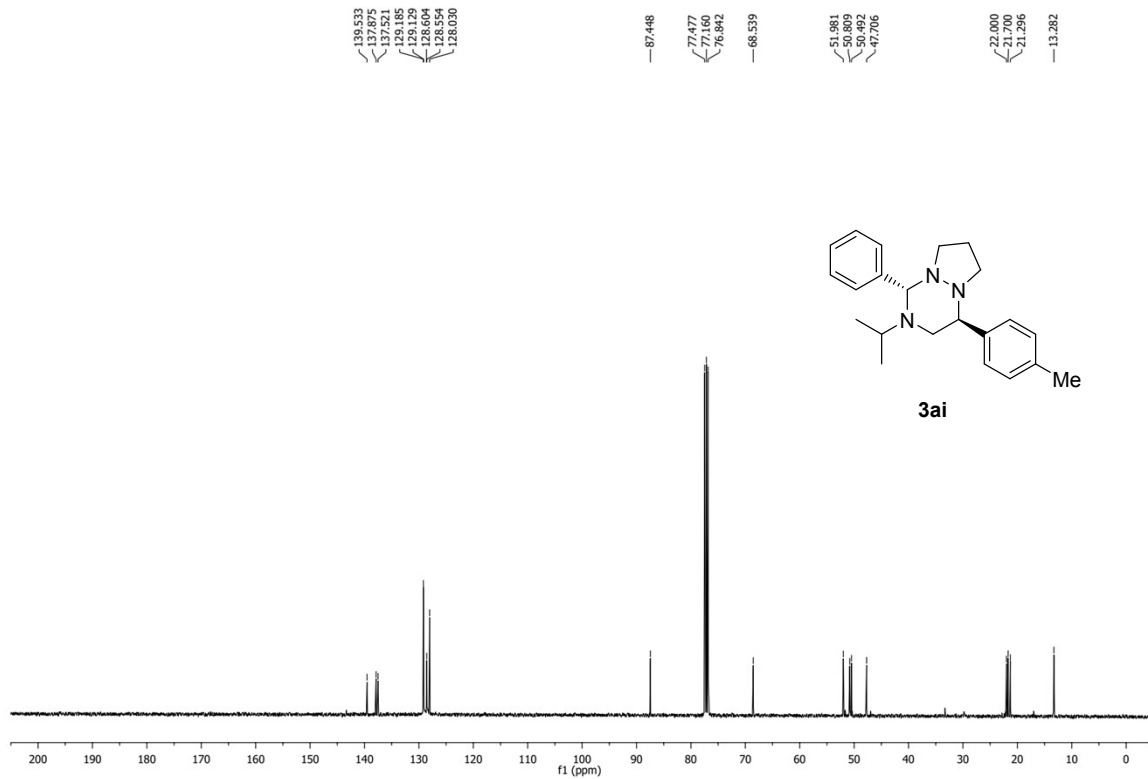

TS-N-BZ-AZ-1H

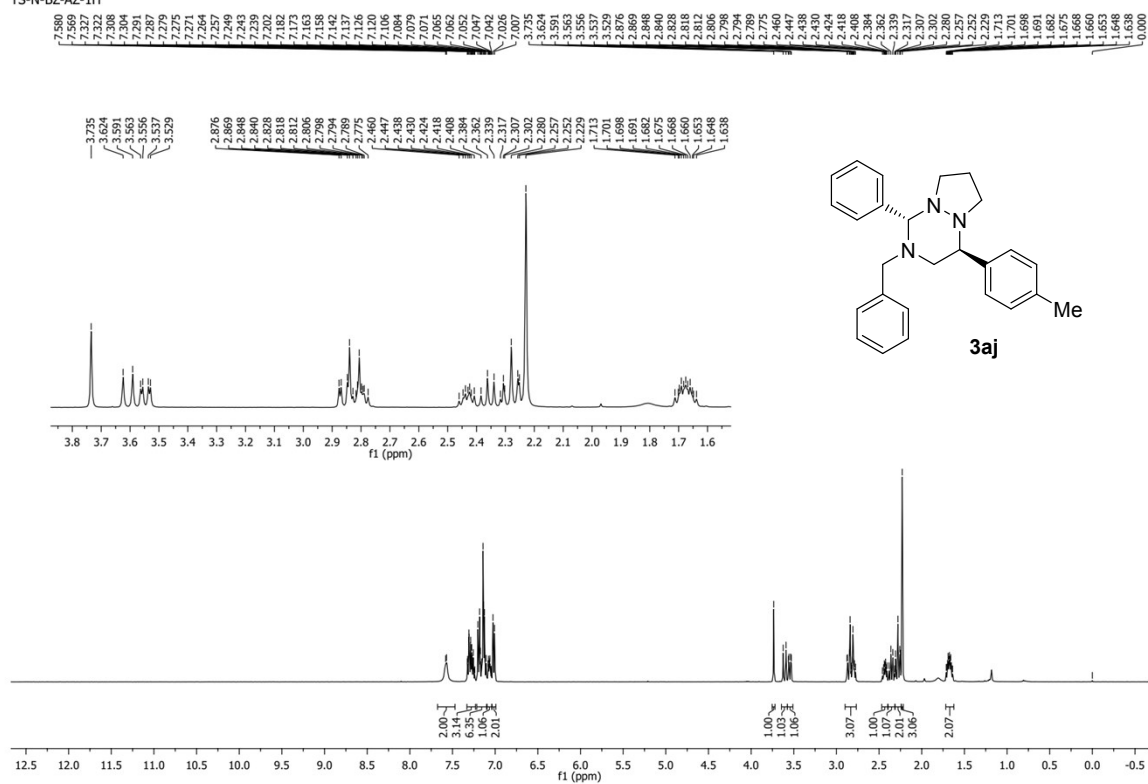

TS-N-BZ-AZ-13C

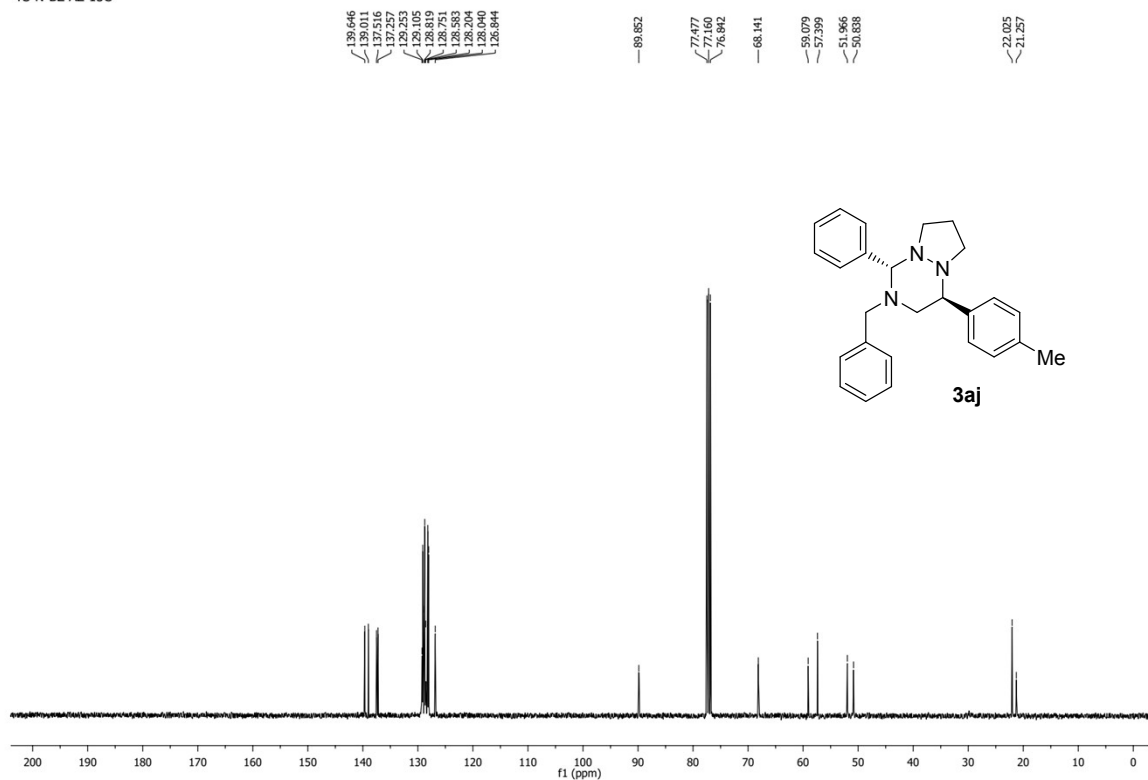



TS-3-NO2-STR-AZ-1H

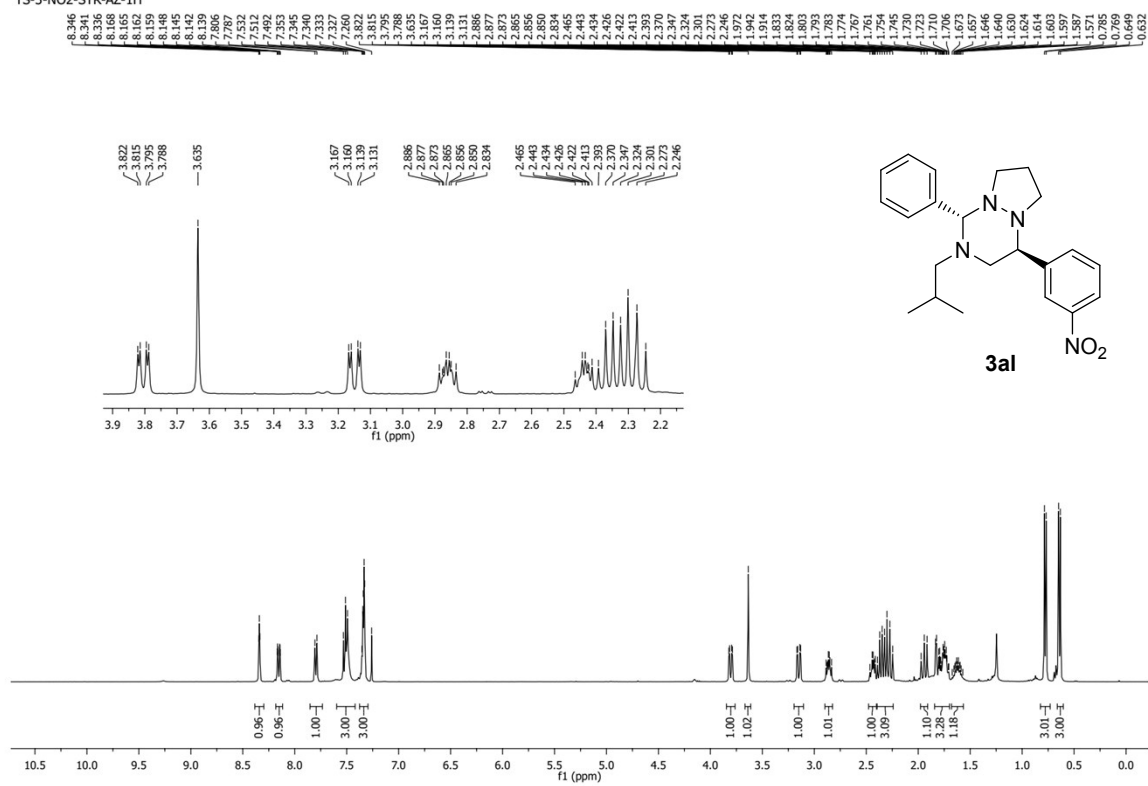

TS-3-NO2-STR-AZ-13C

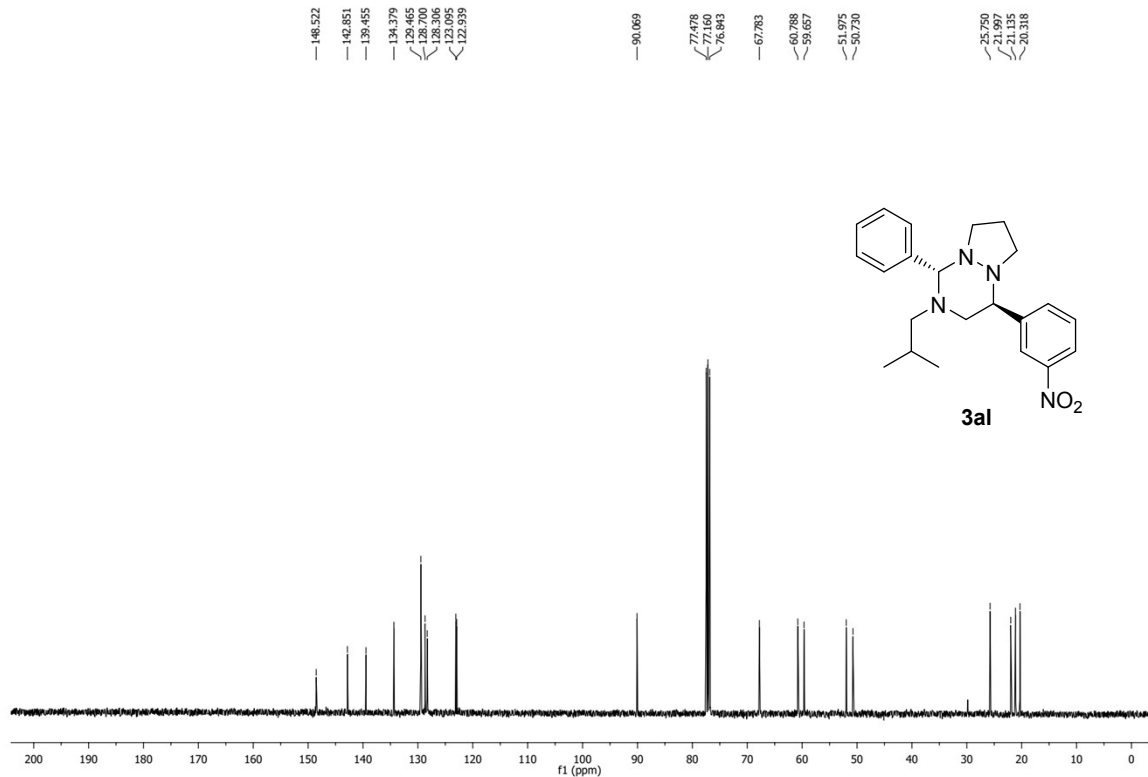

TS-4-CL-STR-AZ-1H

7.491 7.484 7.480 7.400 7.398 7.383 7.377 7.365 7.346 7.332 7.324 7.316 7.299 7.299 7.260 7.260 3.685 3.677 3.658 3.658 3.601 3.601 3.135 3.127 3.106 3.106 3.099 3.099 2.875 2.875 2.863 2.863 2.855 2.855 2.430 2.421 2.415 2.415 2.399 2.399 2.380 2.380 2.357 2.357 2.341 2.341 2.335 2.335 2.312 2.312 2.282 2.282 2.272 2.272 2.246 2.246 2.232 2.232 2.197 2.197 2.190 2.190 2.181 2.181 1.791 1.791 1.781 1.781 2.409 2.409 2.399 2.399 2.380 2.380 2.341 2.341 1.731 1.731 2.335 2.335 1.725 1.725 2.312 2.312 1.709 1.709 2.282 2.282 2.272 2.272 2.255 2.255 2.227 2.227 1.957 1.957 1.654 1.654 1.632 1.632 1.900 1.900 1.821 1.821 1.812 1.812 1.791 1.791 1.665 1.665 1.761 1.761 1.747 1.747 1.740 1.740 1.731 1.731 1.725 1.725 1.709 1.709 1.697 1.697 1.687 1.687 1.665 1.665 1.654 1.654 1.648 1.648 1.638 1.638 1.632 1.632 1.622 1.622 1.612 1.612 1.605 1.605 1.595 1.595 1.579 1.579 1.579 1.579 0.779 0.779 0.763 0.763 0.648 0.648 0.631 0.631

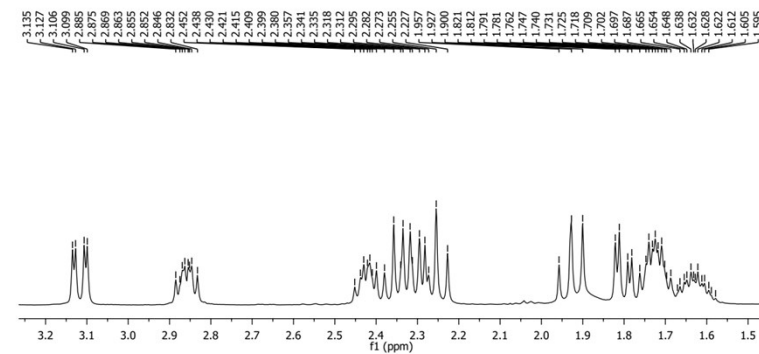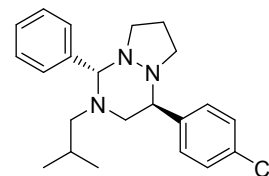

3am

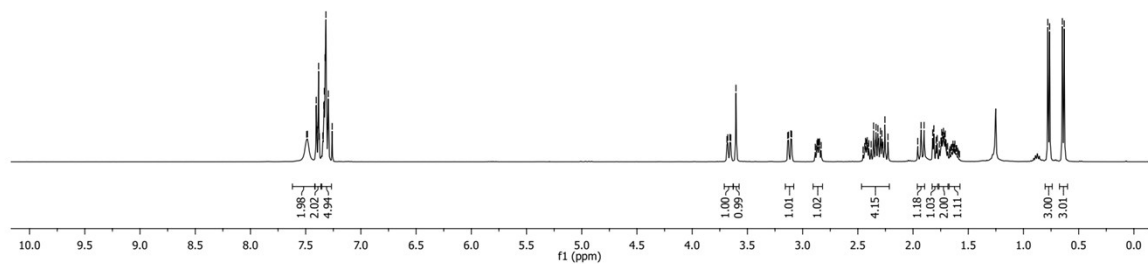

TS-4-CL-STR-AZ-13C

138.660 138.655 133.485 133.487 129.487 128.683 128.615 128.259 90.260 77.478 77.160 76.843 67.844 60.681 59.635 51.631 50.778 25.744 21.952 21.173 20.332

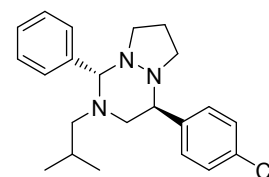

3am

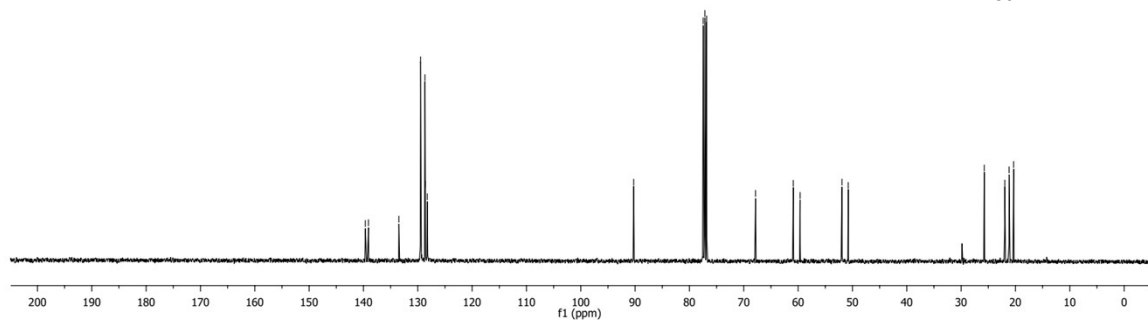





TS-4-F-STR-BZ-AZ-19F

-114.717

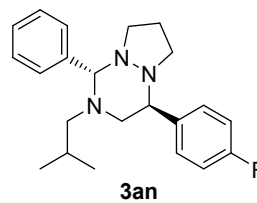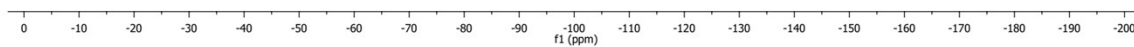

TS-4-OME-STR-AZ-1H

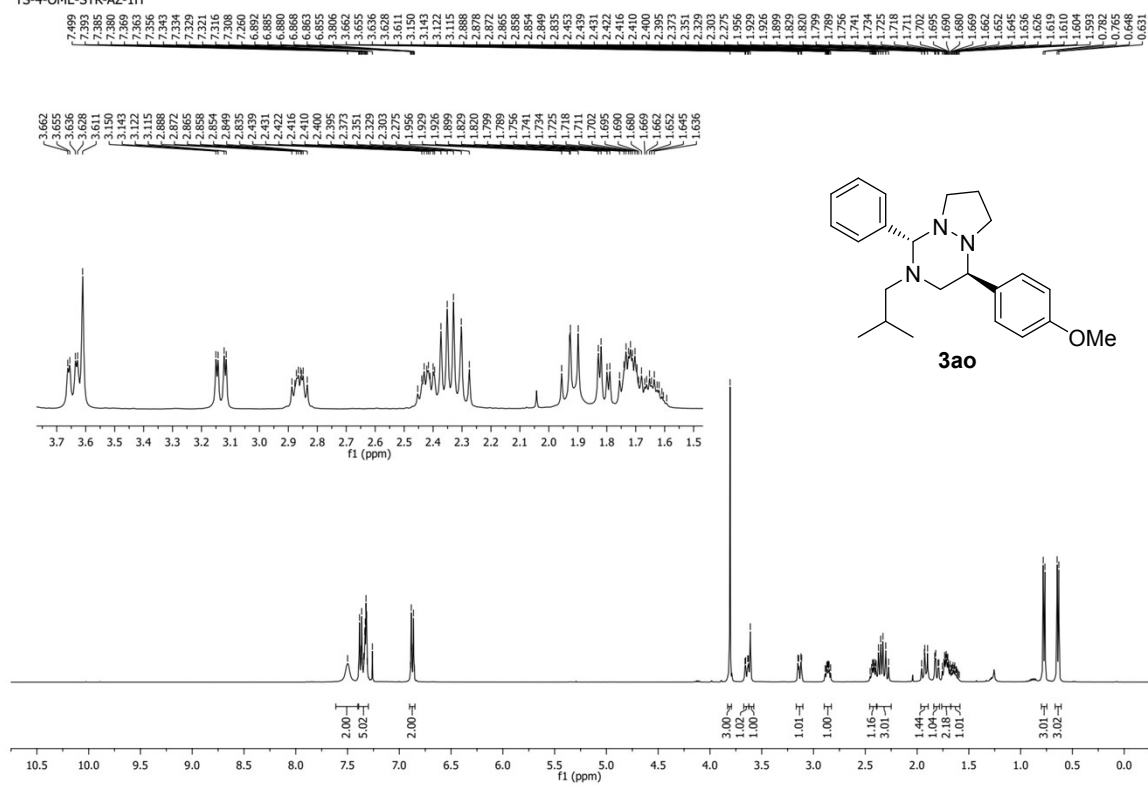

TS-4-OME-STR-AZ-13C

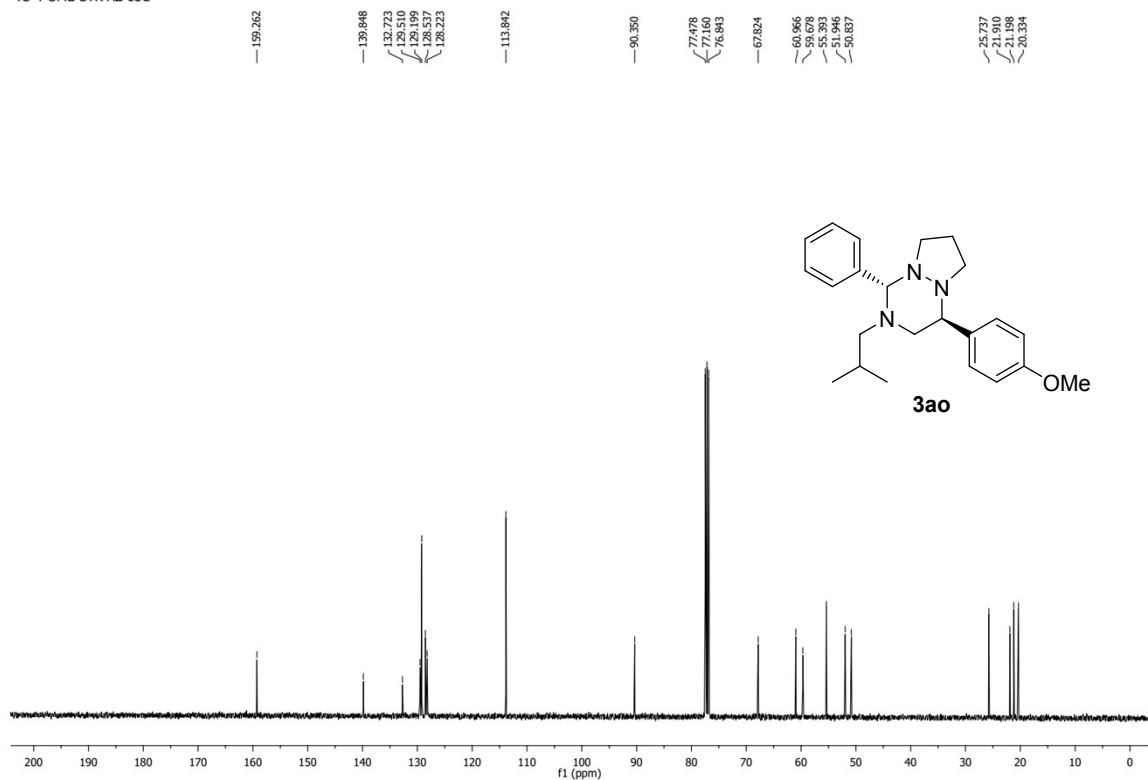

TS-4-OME-DIAZ-BZ-AZ-1H

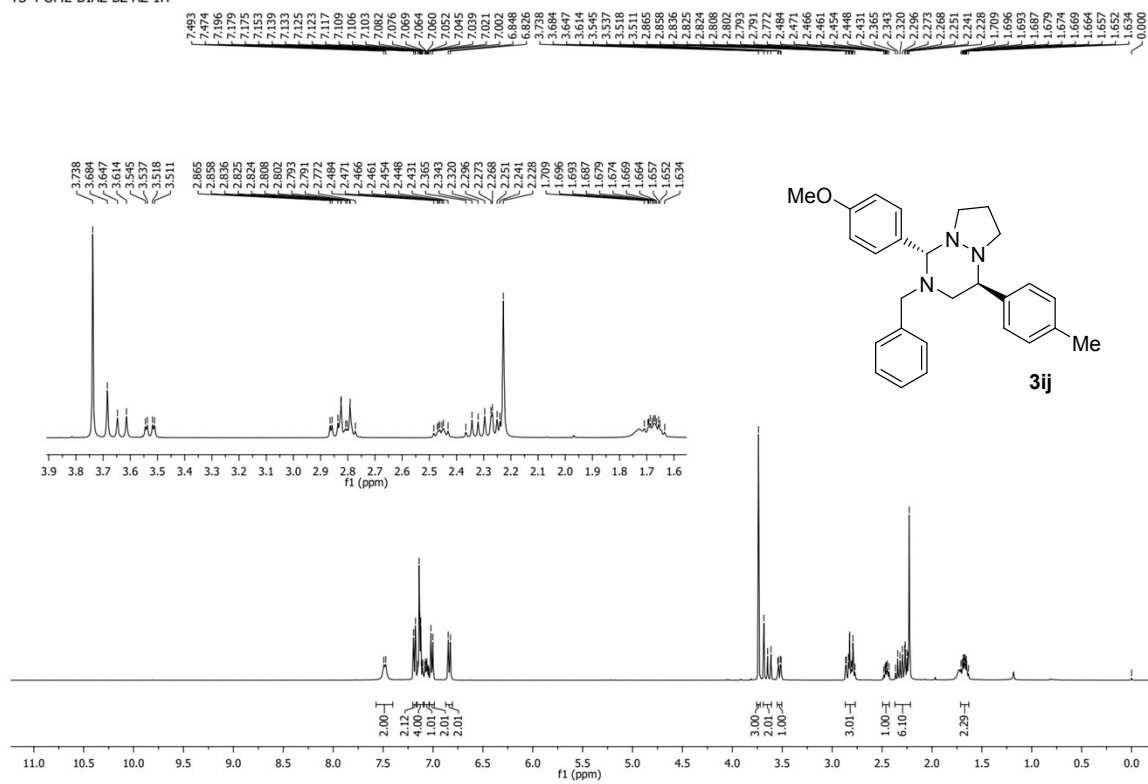

TS-4-OME-DIAZ-BZ-AZ-13C

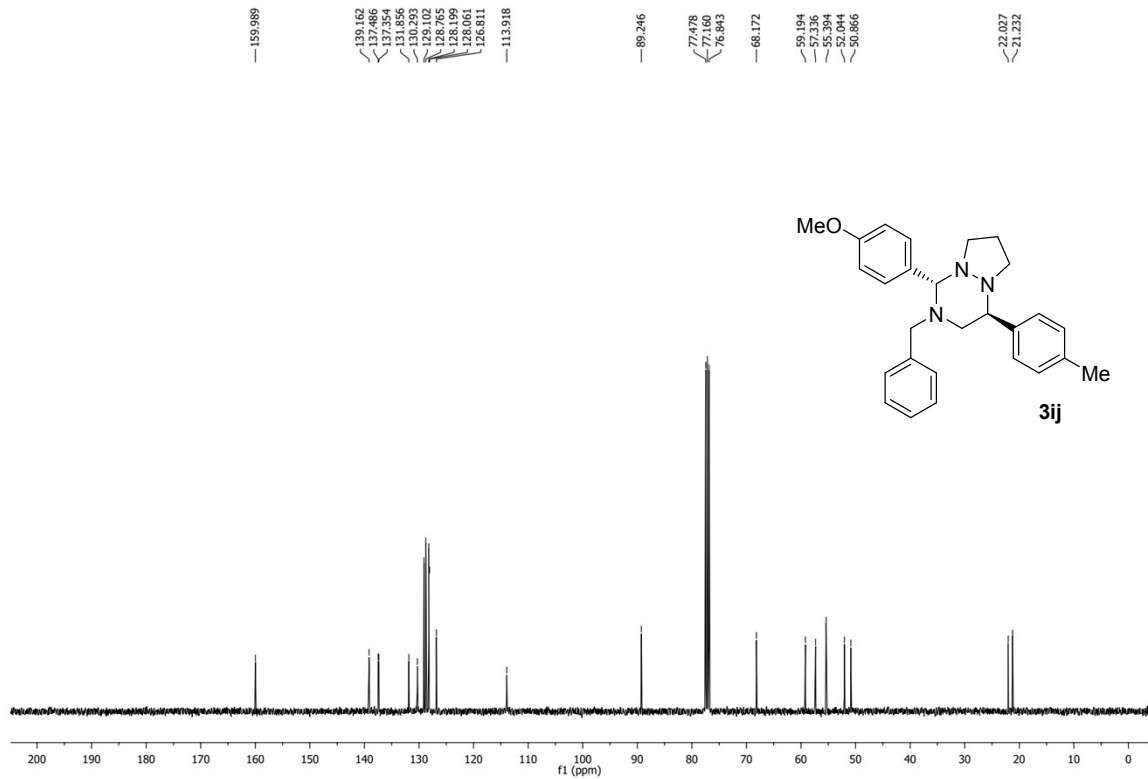

TS-4-OME-DIAZ-4-OME-BZ-AZ-1H

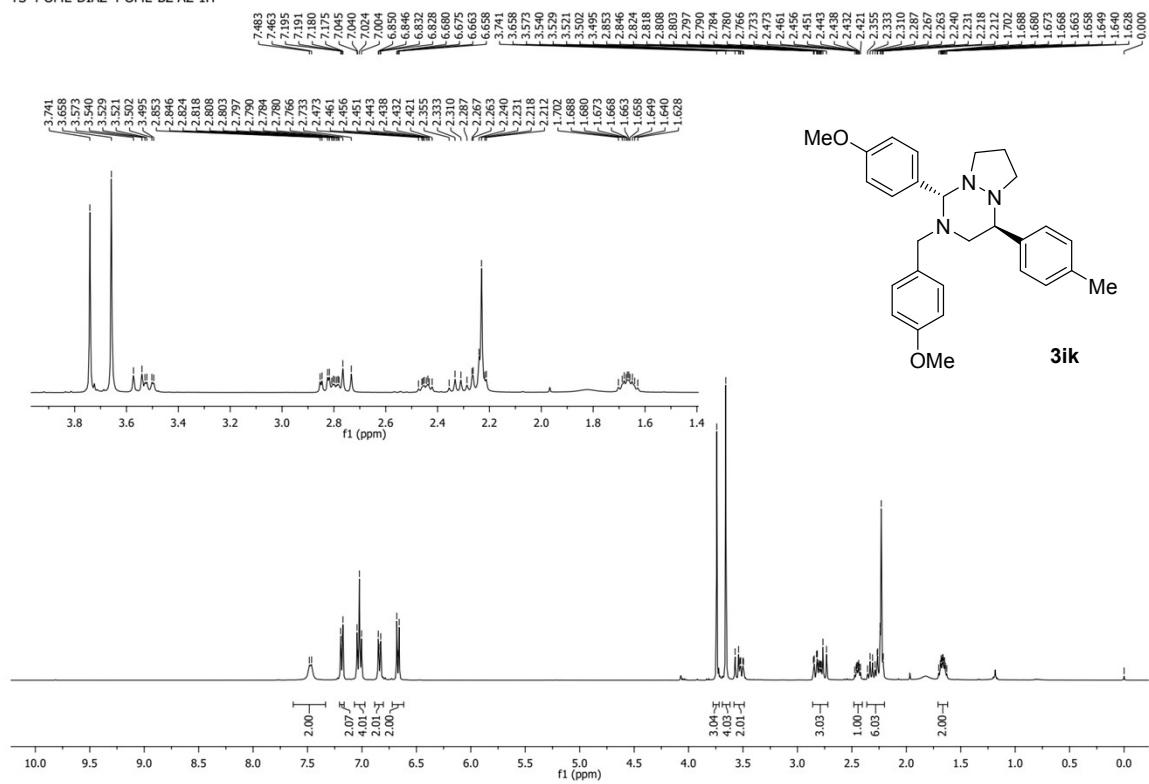

TS-4-OME-DIAZ-4-OME-BZ-AZ-13C

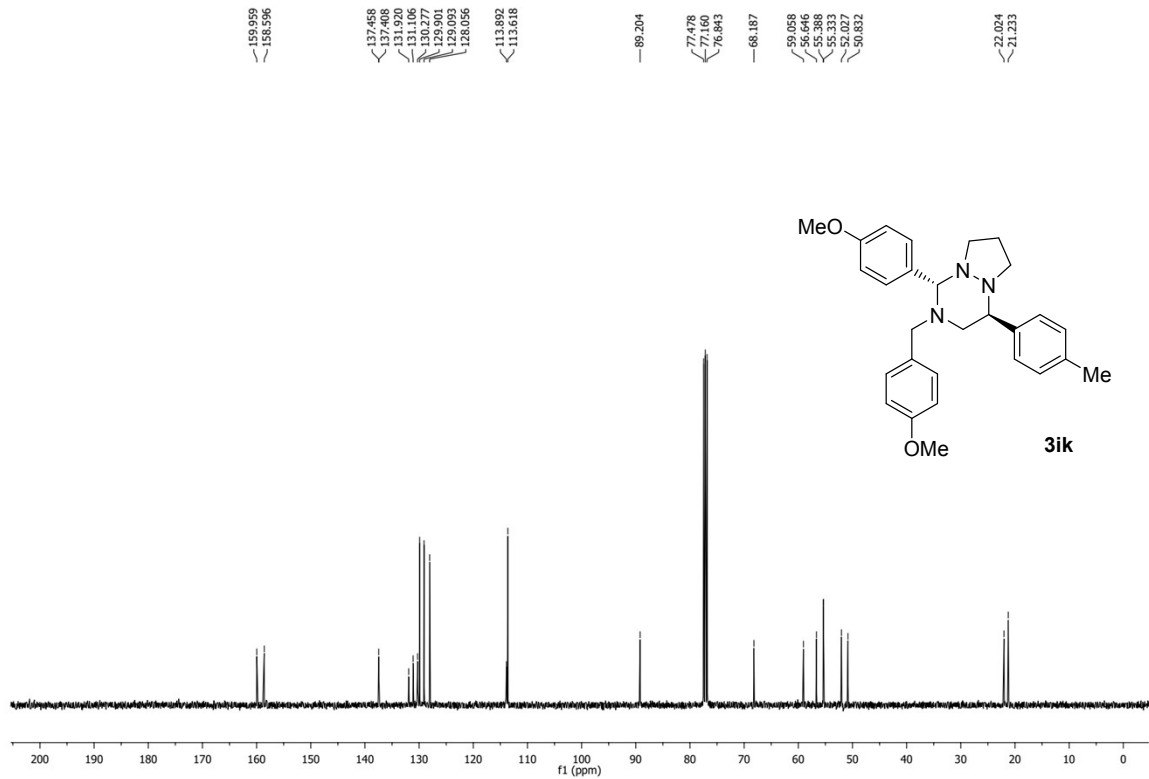

TS-4-CN-CHI-2-1H

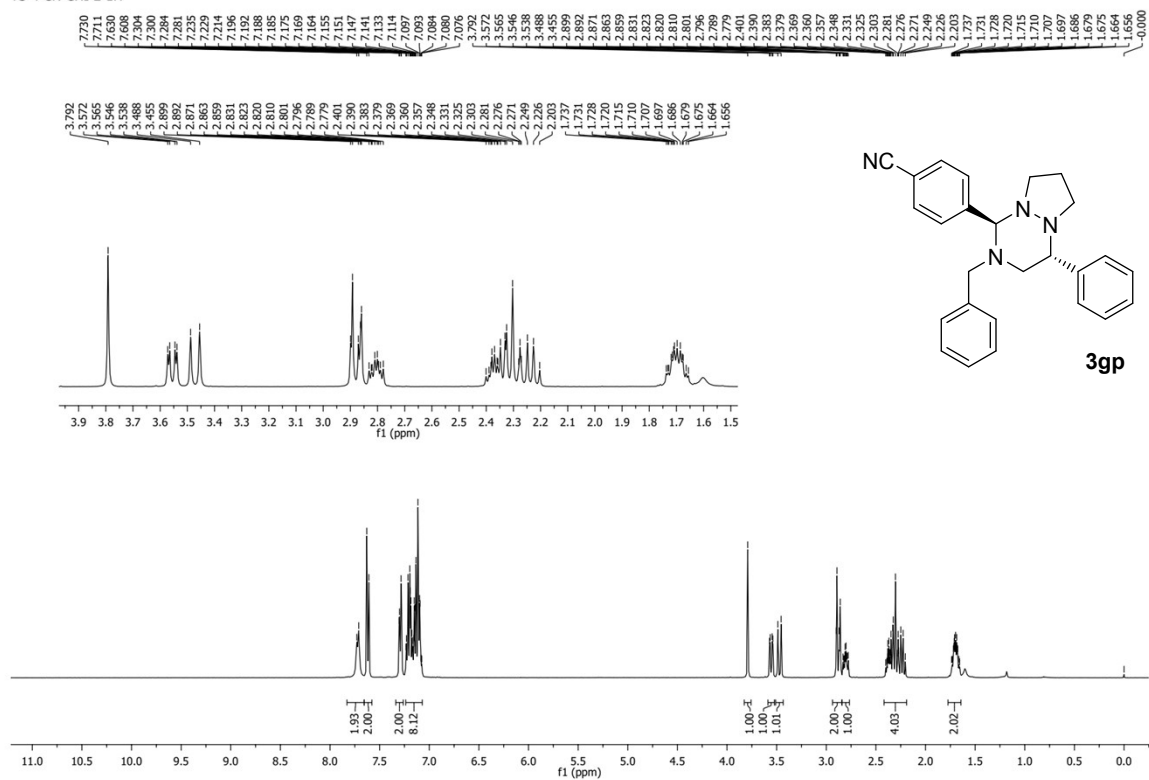

TS-4-CN-CHI-13C

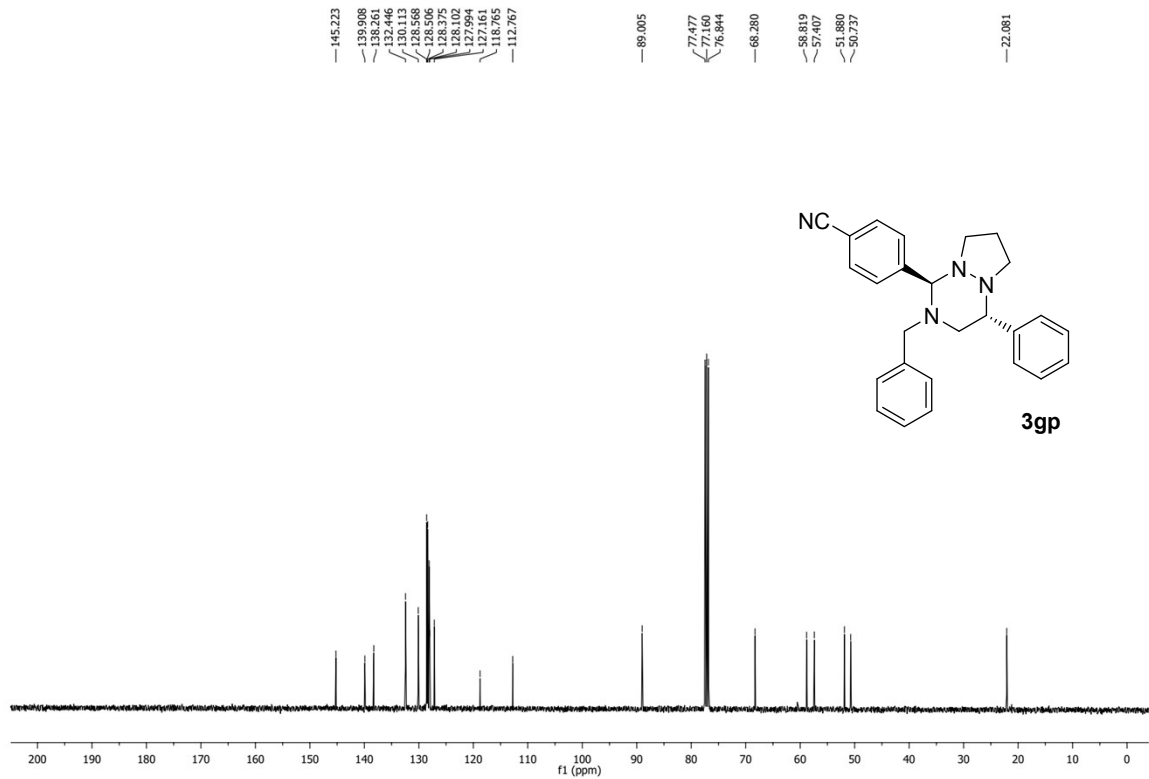



TS-4-NO2-CHI-2-1H

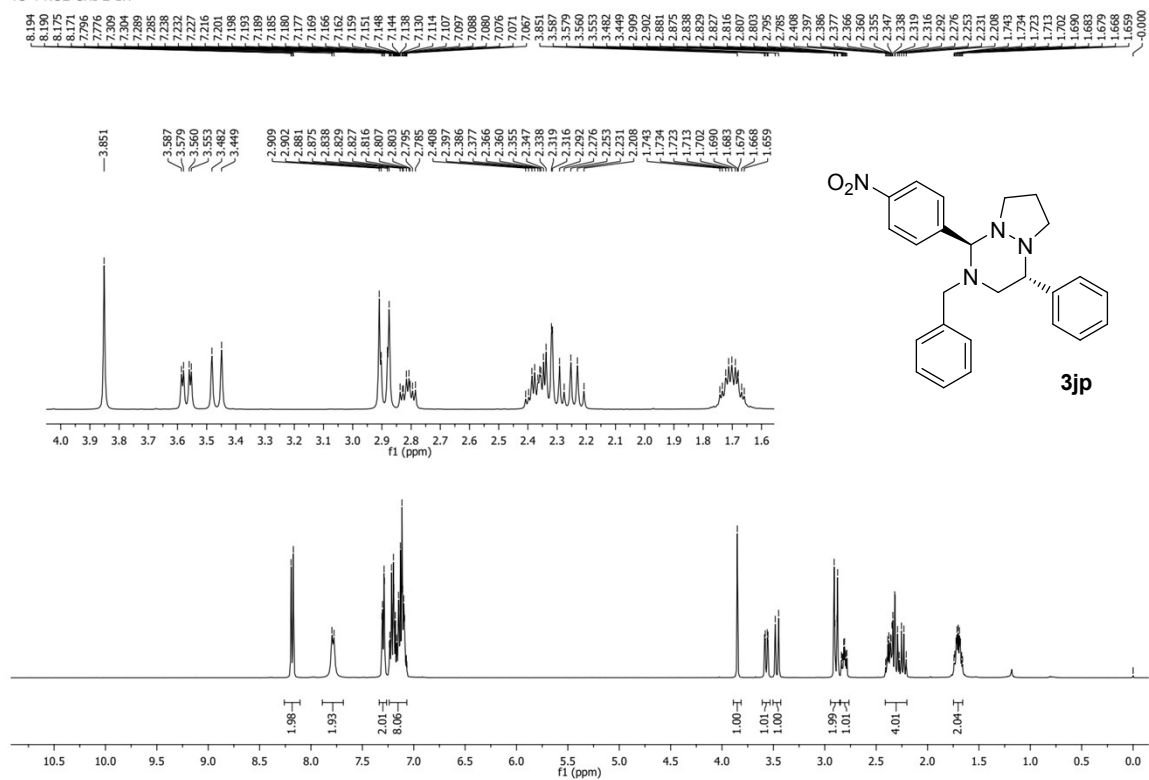

TS-4-NO2-CHI-13C

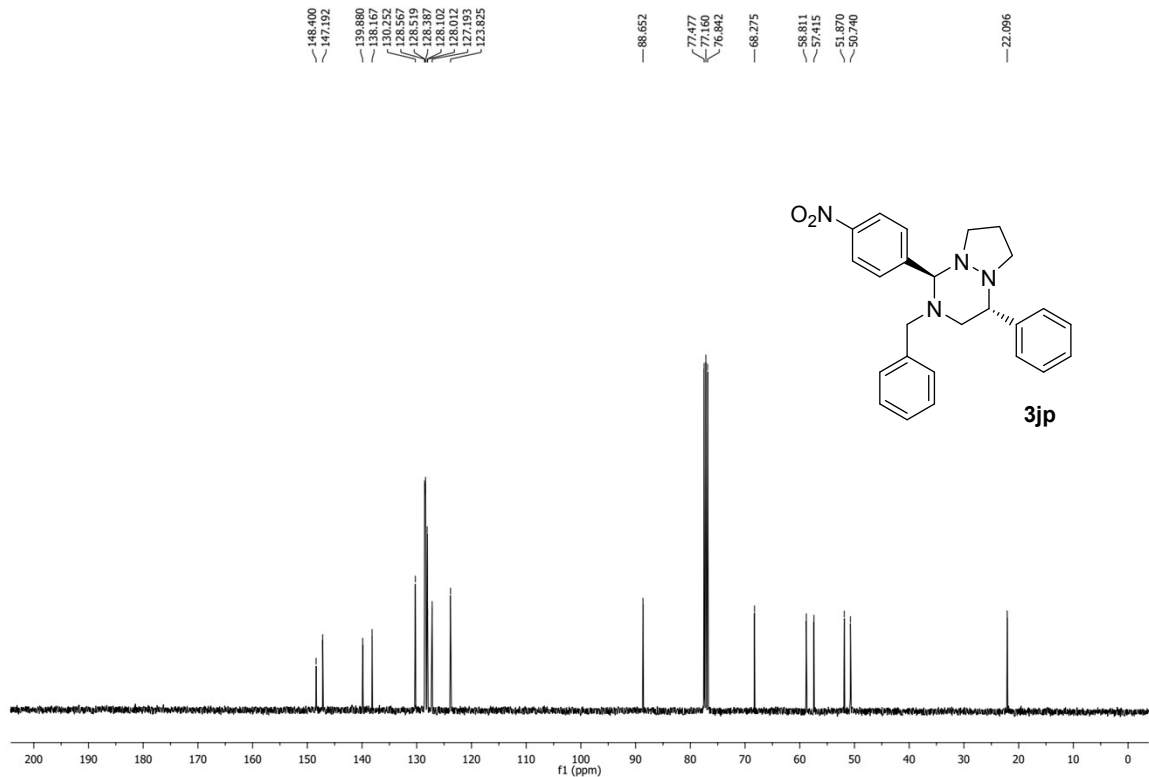

TS-BPIN-DIAZ-AZ-1H

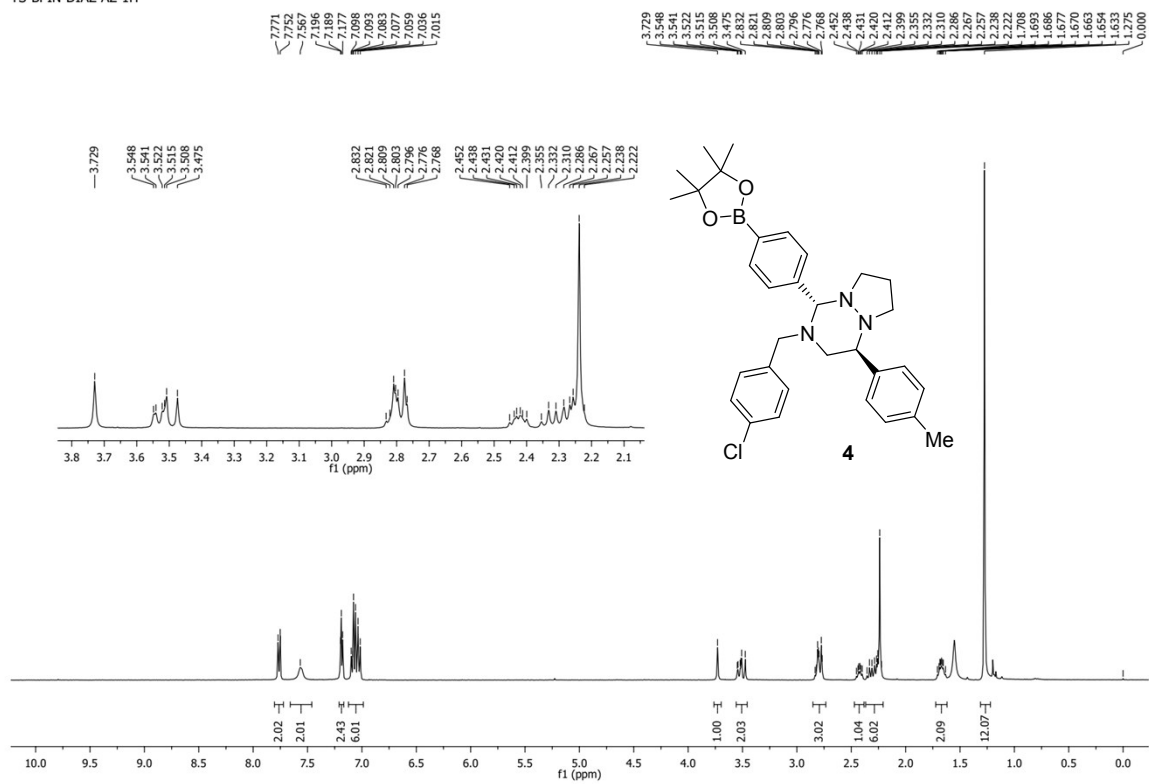

TS-BPIN-DIAZ-AZ-13C

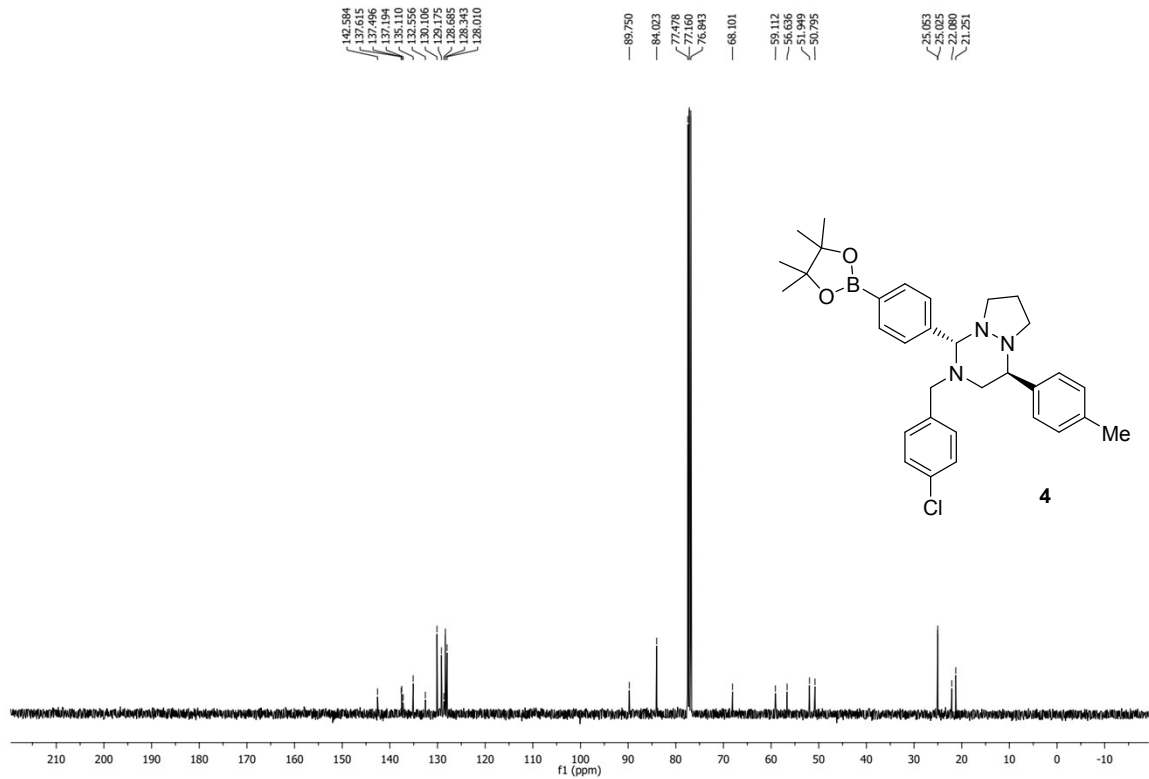

Supplement: c9cc10089j1.pdf [file c9cc10089j1.pdf]
